# Supplementary material for: A highly active and chemoselective homobimetallic ruthenium catalyst for one-pot reductive amination in water
Source: Royal Society of Chemistry journal article supplement (doi:10.1039/d3gc03374k), 2023-12-13
Supplement: d3gc03374k1.pdf [file d3gc03374k1.pdf]

## Supporting Information for

### Highly Active and Chemoselective Homobimetallic Ruthenium Catalyst for One-pot Reductive Amination in Water

Gopal Deshmukh, Thakur Rochak Kumar Rana, Nikita Yadav, Gopalan Rajaraman and Ramaswamy Murugavel

---

#### General Informations

All the experimental procedures were conducted in a well-ventilated fume hood in an ambient atmosphere. The amines and aldehydes substrates employed in catalysis were used as available commercially. Other chemicals and solvents were procured commercially and used without any purification. The ruthenium compounds reported herein are air and moisture stable and no special measures were taken in handling them.

The  $^1\text{H}$  and  $^{13}\text{C}$  NMR spectra were recorded either on a Bruker Avance III 500 or Bruker AV III 400 MHz NMR spectrometer using  $\text{CDCl}_3$  or  $\text{DMSO-d}_6$  as solvents. The melting points were measured in glass capillaries and are reported uncorrected. FT-IR spectra were recorded on a PerkinElmer Spectrum One Infrared Spectrometer (Model number- 73465) in KBr diluted discs within the  $4000\text{--}400\text{ cm}^{-1}$  frequency range. Elemental analyses were performed on a Thermo Finnigan (FLASH EA 1112) microanalyzer. ESI-MS measurements were performed on a Bruker Maxis Impact electrospray mass spectrometer. An Agilent 7890A GC system with an FID detector and a J & amp; WDB-1 column (10 m, 0.1 mm ID) was used to conduct GC-MS analysis., The catalytic product yields of the optimized reactions were determined for one of the starting materials. The UV-NIR-3600 spectrophotometer, Shimadzu was used for the UV-visible studies. Powder X-ray diffractions were recorded on a Rigaku SmartLab powder X-ray diffractometer using  $\text{Cu-K}\alpha$  radiation ( $\lambda = 1.54190\text{ \AA}$ ). The molecular structure of complexes **Ru1** and **Ru2** were determined using  $\text{Mo-K}\alpha$  radiation ( $\lambda = 0.71073\text{ \AA}$ ) Bruker D8 QUEST diffractometer.<sup>1-4</sup>

**Procedure for preparation of formic acid: sodium formate buffer (HCOOH/HCOONa) aqueous solutions of various pH values.**

Formic acid (98%, wt), sodium formate, and water were mixed in a conical flask to prepare the solutions with various pH values required to perform the reactions in Scheme 2. At 25 °C, the pH values were measured using a pH meter.

**pH 3.5:** 6.8 g of sodium formate (10 mmol), 3.7 mL of formic acid (98-100% by wt, 10 mmol), and 96 mL of water were mixed to attain pH 3.5 HCOONa and HCOOH buffer.

Using this all-other pH solutions have been prepared.

**Table S1.** Experiments for TON and TOF

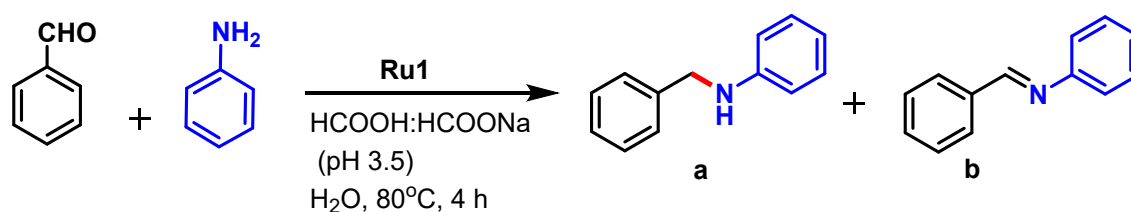

An oven-dried round bottom flask containing a stir bar was charged with benzaldehyde (5.0 mmol), aniline (5.0 mmol), and water (10 mL), and stirred under an ambient atmosphere for 5 minutes. **Ru1** (0.0001 mol% or 0.005 mol%) solution and buffer solution (HCOOH:HCOONa, pH 3.5, 15 mL) were added to the reaction mixture. The resulting reaction mixture was stirred at 80 °C for 4 h. After completion, the reaction mixture was extracted with ethyl acetate, dried over sodium sulfate, and analyzed by GC-MS (Figure S93-S95).

| Entry | Catalyst (mol%) | Yield (%) |    | Conversion (%) | TON    | TOF (h <sup>-1</sup> ) |
|-------|-----------------|-----------|----|----------------|--------|------------------------|
|       |                 | a         | b  |                |        |                        |
| 1     | 0.05            | 96        | 3  | 100            | 1920   | 480                    |
| 2     | 0.005           | 79        | 14 | 100            | 15800  | 3950                   |
| 3     | 0.001           | 73        | 26 | >99            | 67000  | 16750                  |
| 4     | 0.0001          | 43        | 56 | >99            | 430000 | 107500                 |

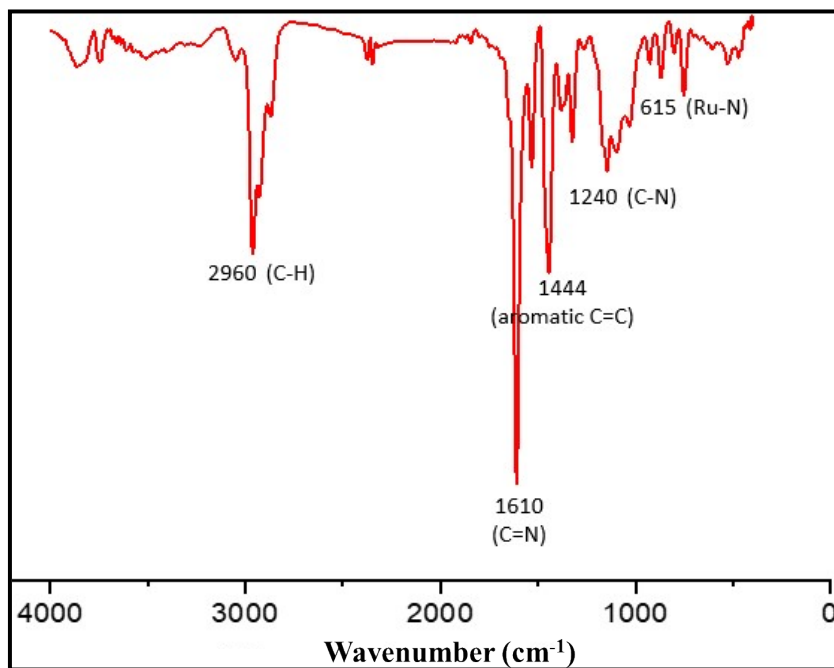

**Figure S1.** FT-IR spectrum of complex **Ru1** (as KBr diluted disk).

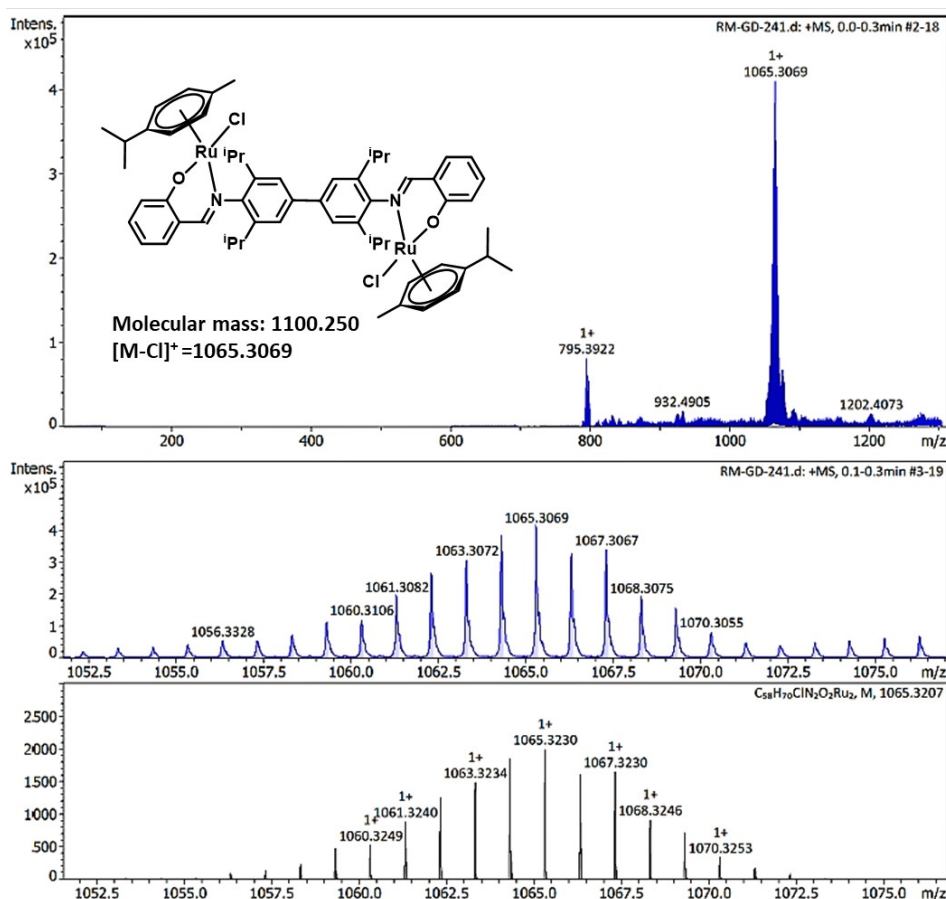

**Figure S2.** ESI-MS spectrum of complex **Ru1** in methanol showing experimental and simulated pattern for  $[\text{M-Cl}]^+$  ion at  $m/z$  1065.3069.

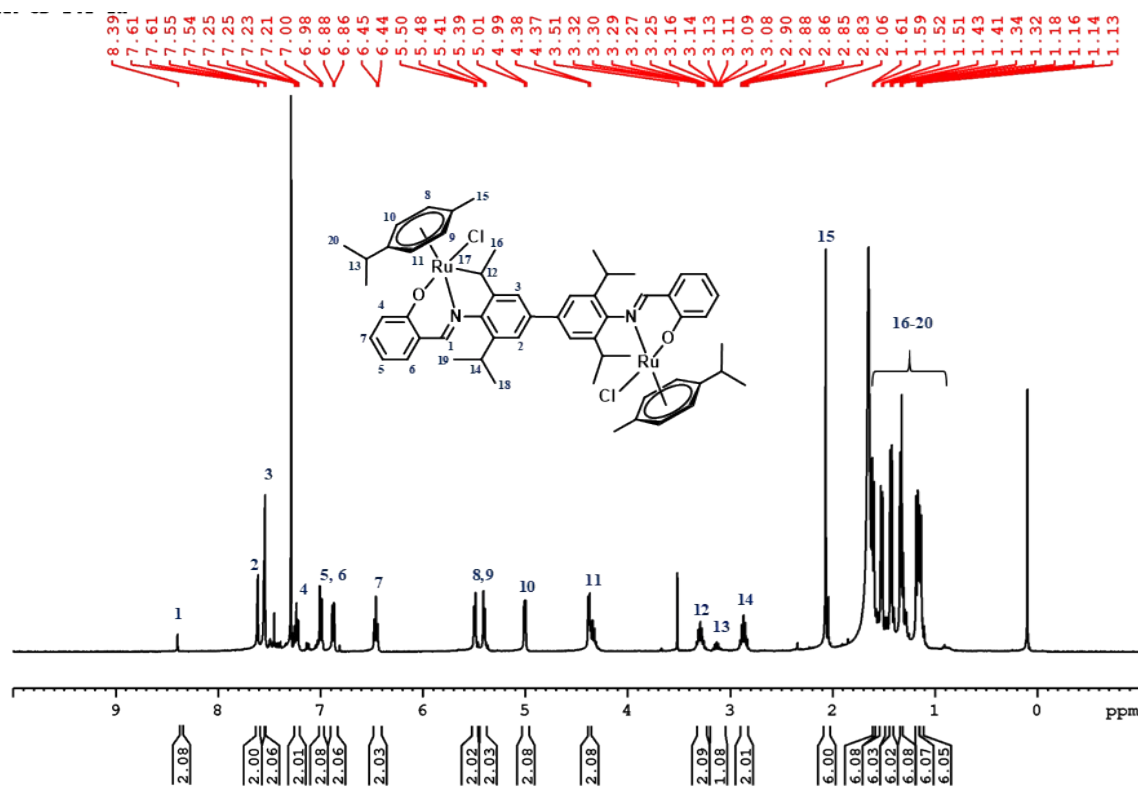

**Figure S3.** <sup>1</sup>H NMR spectrum of complex **Ru1** in CDCl<sub>3</sub> (400 MHz).

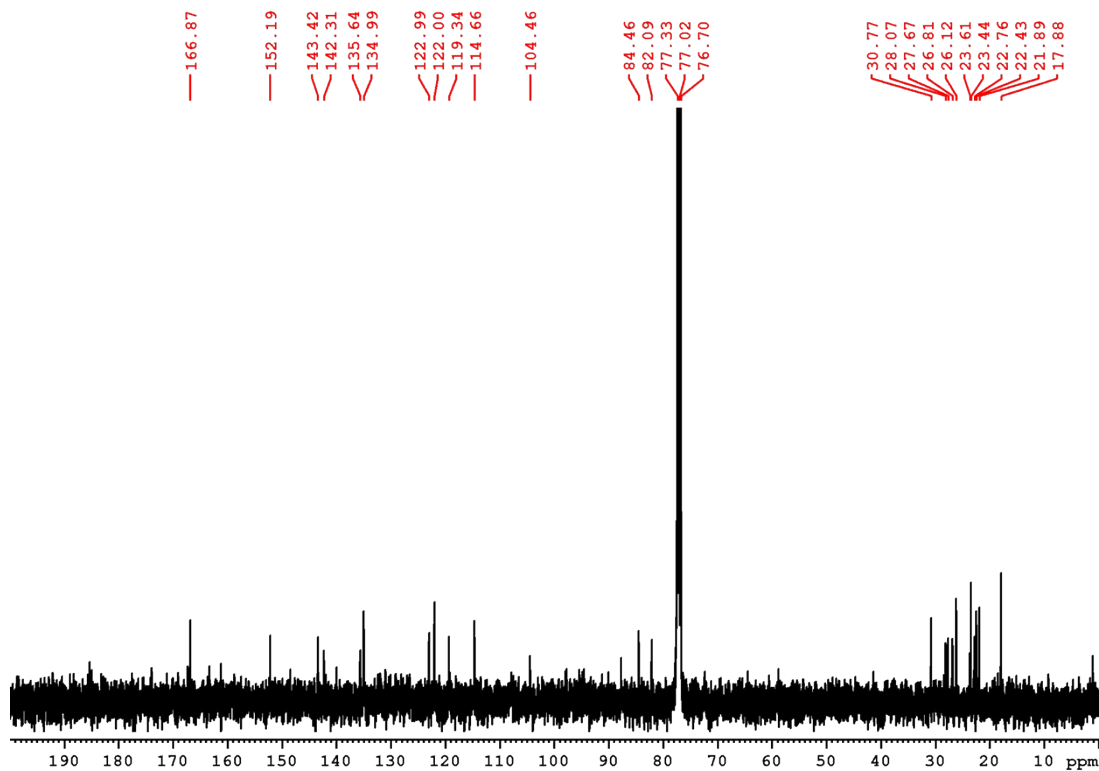

**Figure S4.** <sup>13</sup>C NMR spectrum of complex **Ru1** in CDCl<sub>3</sub> (100 MHz).



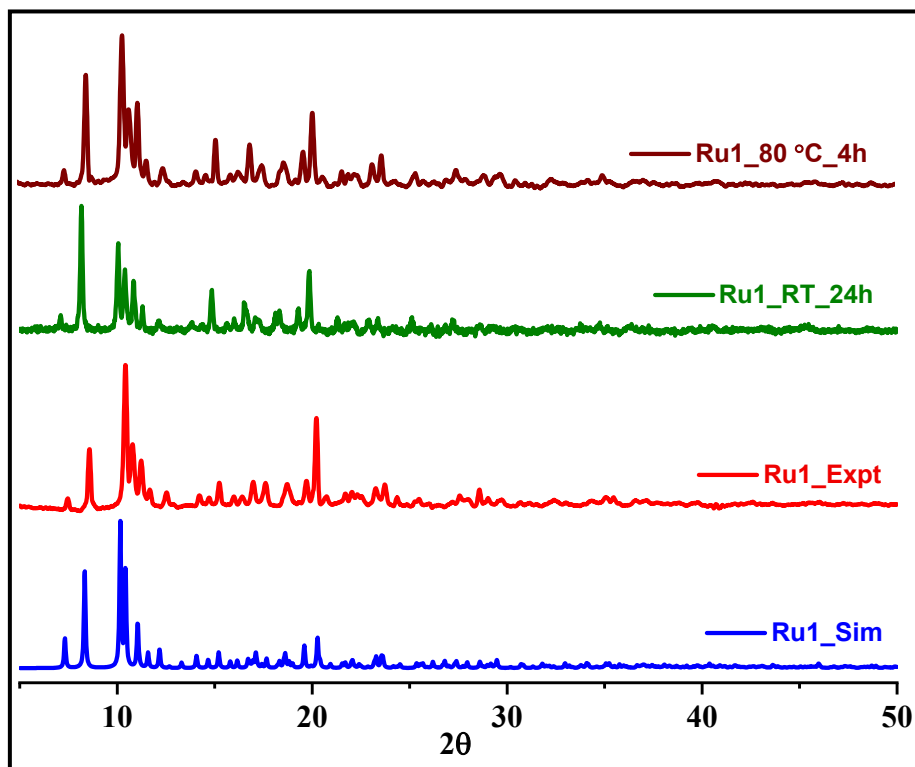

**Figure S5.** Powder X-ray diffraction pattern of complex **Ru1**. **Ru1\_Expt** corresponding to assynthesed sample. **Ru1\_RT\_24h** corresponding to sample soaked in water for 24 hours. **Ru1\_80 °C\_4h** corresponding to sample soaked in water and heated at 80 °C for 4 hours.

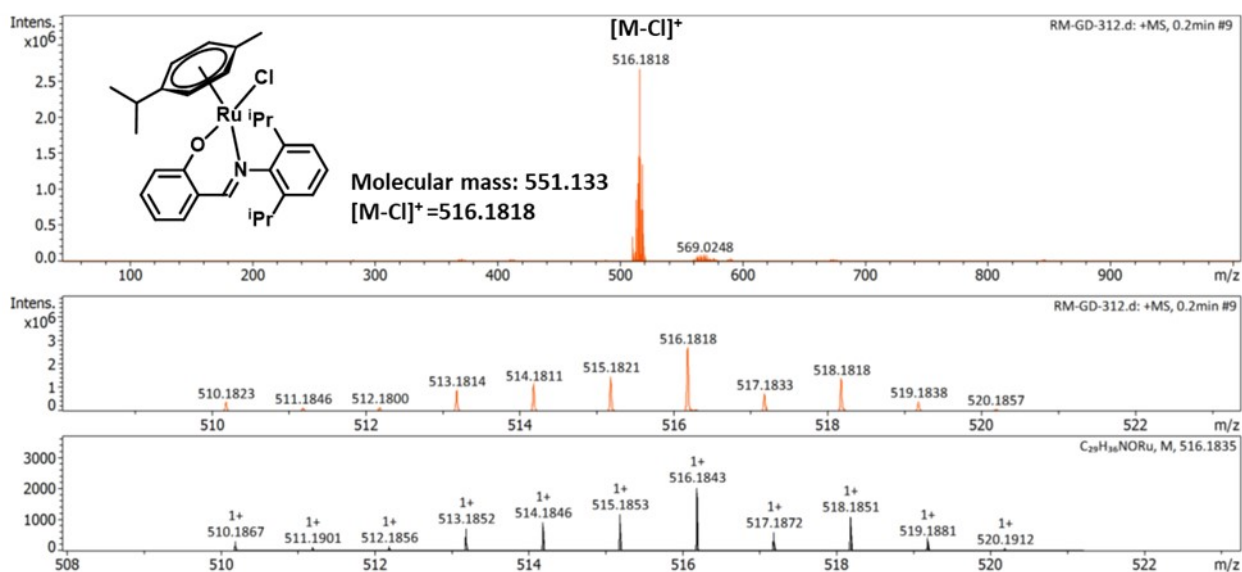

**Figure S6.** ESI-MS spectrum of complex **Ru2** in methanol showing experimental and simulated pattern for  $[M-Cl]^+$  ion at  $m/z$  516.1818.

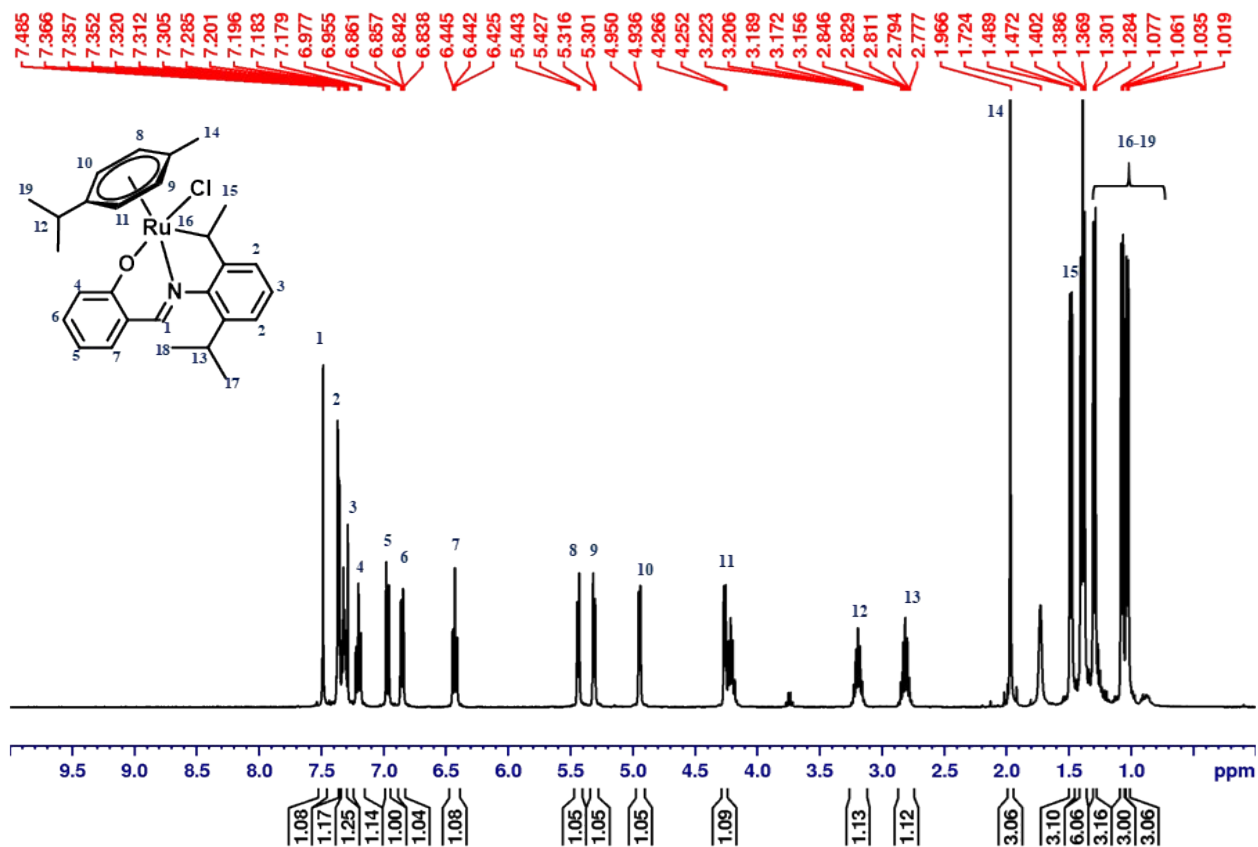

**Figure S7.** <sup>1</sup>H NMR spectrum of complex **Ru2** in CDCl<sub>3</sub> (400 MHz).

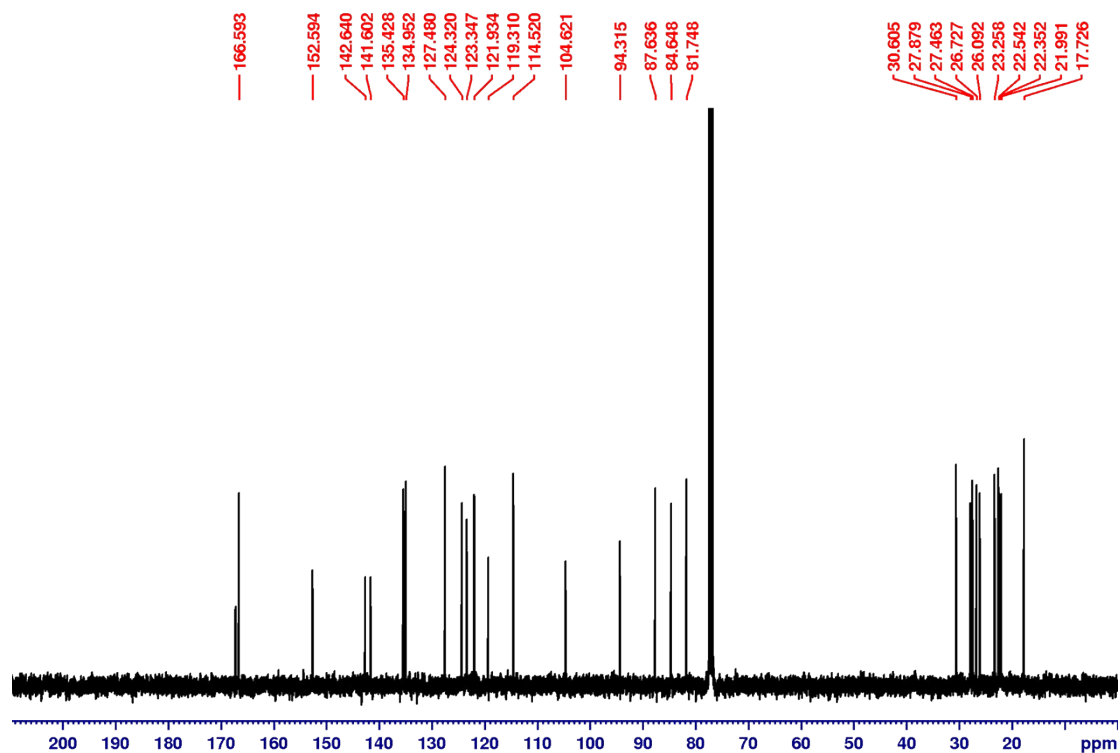

**Figure S8.** <sup>13</sup>C NMR spectrum of complex **Ru2** in CDCl<sub>3</sub> (100 MHz).

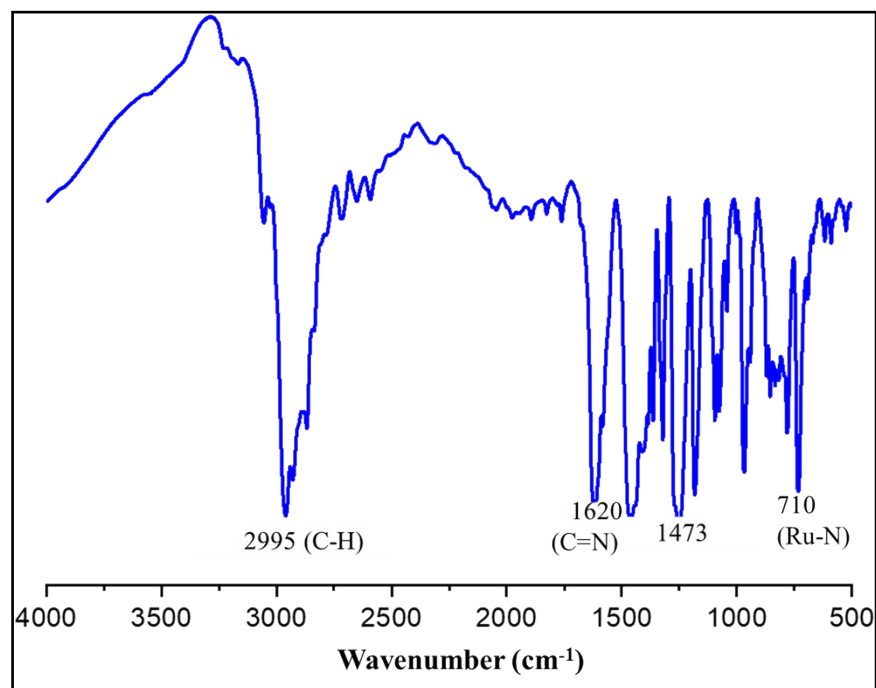

**Figure S9.** FT-IR spectrum of complex **Ru2** (as KBr diluted disk).

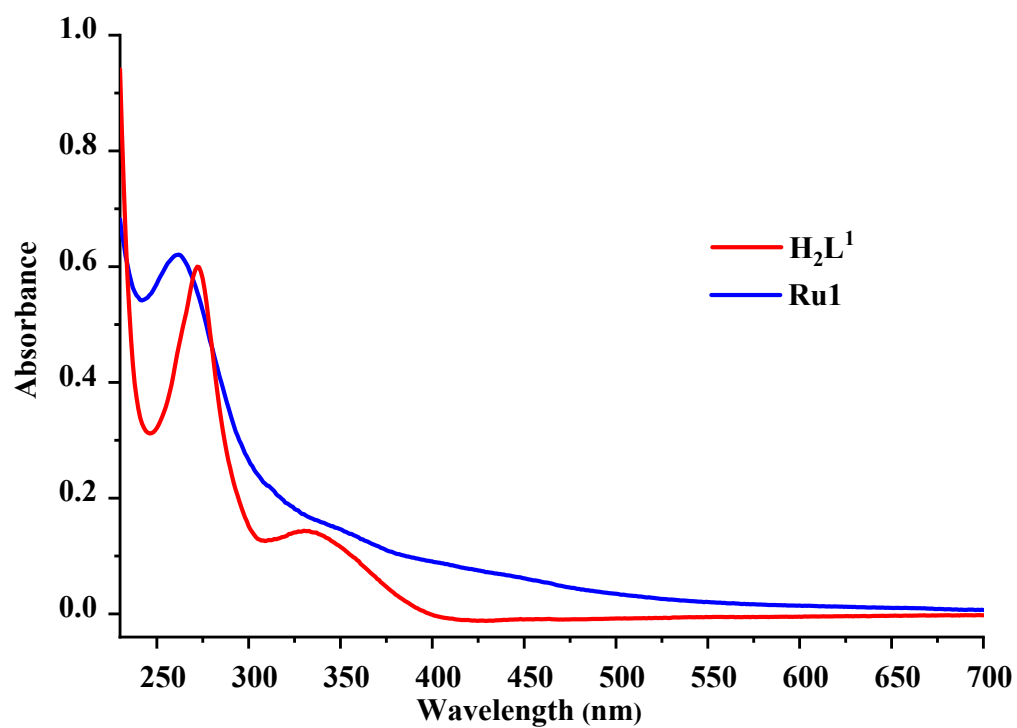

**Figure S10.** UV-vis spectra of the complex **Ru1** and **H<sub>2</sub>L<sup>1</sup>** ligand in DCM [ $\lambda_{\text{max}}$  (nm),  $\epsilon$  ( $\times 10^5$  M<sup>-1</sup> cm<sup>-1</sup>)] **Ru1**(4.52 mM); 226 (1.6), 266 (1.3), **H<sub>2</sub>L<sup>1</sup>**(7.33 mM); 230 (1.2), 272 (0.8), 332(0.2)].

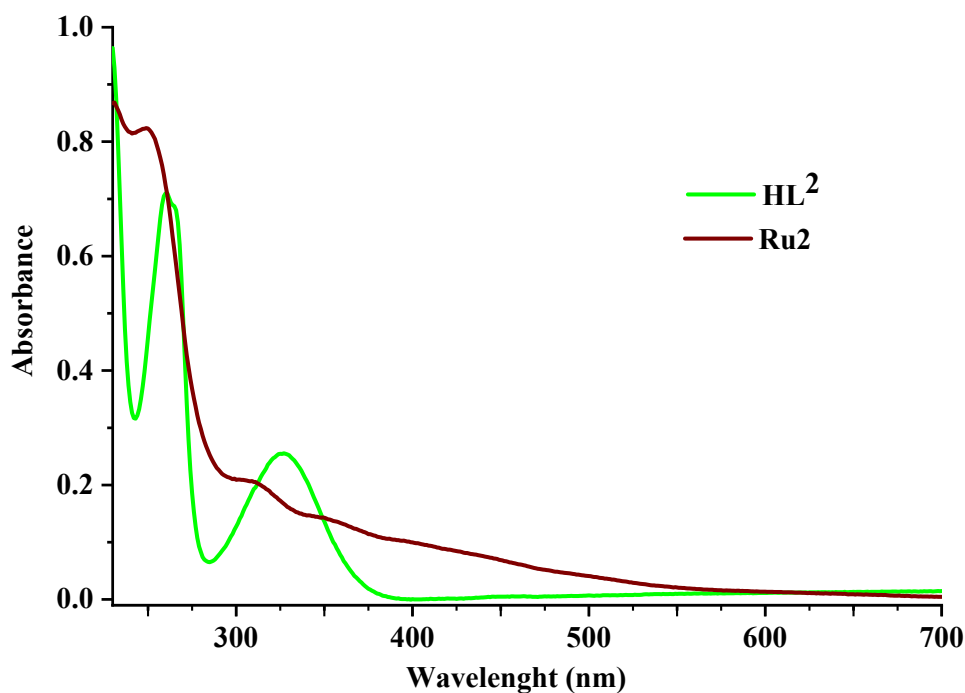

**Figure S11.** UV-vis spectra of the complex **Ru2** and **HL<sup>2</sup>** ligand in DCM [ $\lambda_{\text{max}}$  (nm),  $\epsilon$  ( $\times 10^5 \text{ M}^{-1} \text{ cm}^{-1}$ )] **Ru2** (12.00 mM); 230 (0.7), 261 (0.6), **HL<sup>2</sup>** (18.40 mM); 230 (0.5), 260 (0.4), 327(0.2)].

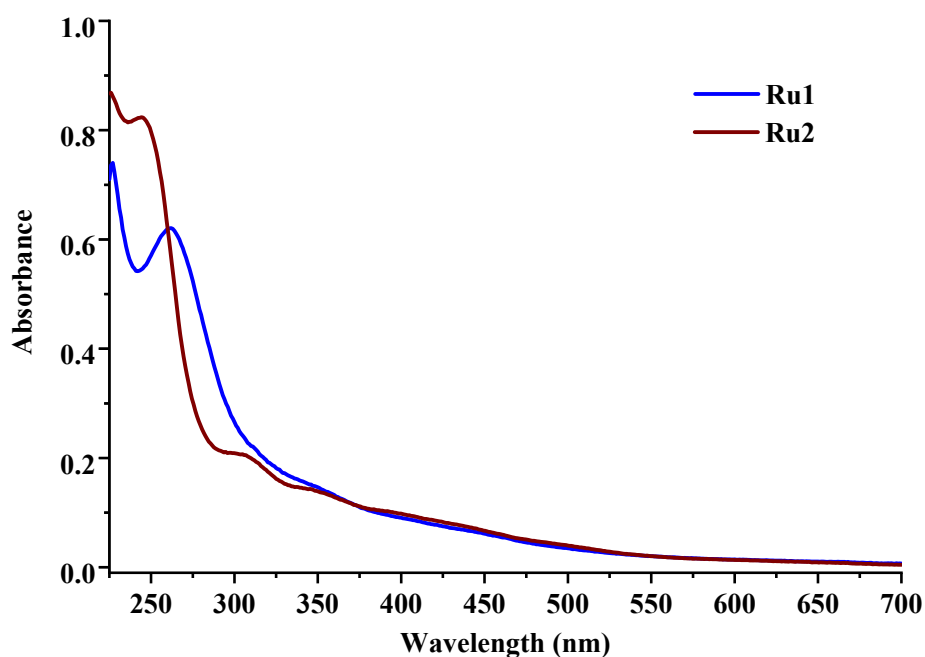

**Figure S12.** UV-vis spectra of the complex **Ru1** and **Ru2** in DCM [ $\lambda_{\text{max}}$  (nm),  $\epsilon$  ( $\times 10^5 \text{ M}^{-1} \text{ cm}^{-1}$ )] **Ru1** (4.52 mM); 226 (1.6), 266 (1.3), **Ru2** (12.00 mM); 230 (0.7), 261 (0.6)].

### Detection of intermediates II and III by ESI-MS

**Ru1** (0.01 mmol) was mixed with 2.0 mL of water along with 3.0 mL of buffer (HCOOH:HCOONa, pH 3.5), and heated at 60 °C in the round bottom flask. Once the reaction started, an aliquot was taken at an interval of every five minutes and analyzed by mass

spectrometry. The Ru-formato species **II** was identified at  $m/z$  1121.29 after ten minutes 32 (Figure S15); this species immediately changed into Ru-hydride species **III**, which was also detected in mass spectrometry at  $m/z$  1033.32 (Figure S14). A prominent change in color in the reaction mixture was observed that occurred once the species converted to Ru-hydride from Ru-formato intermediate.

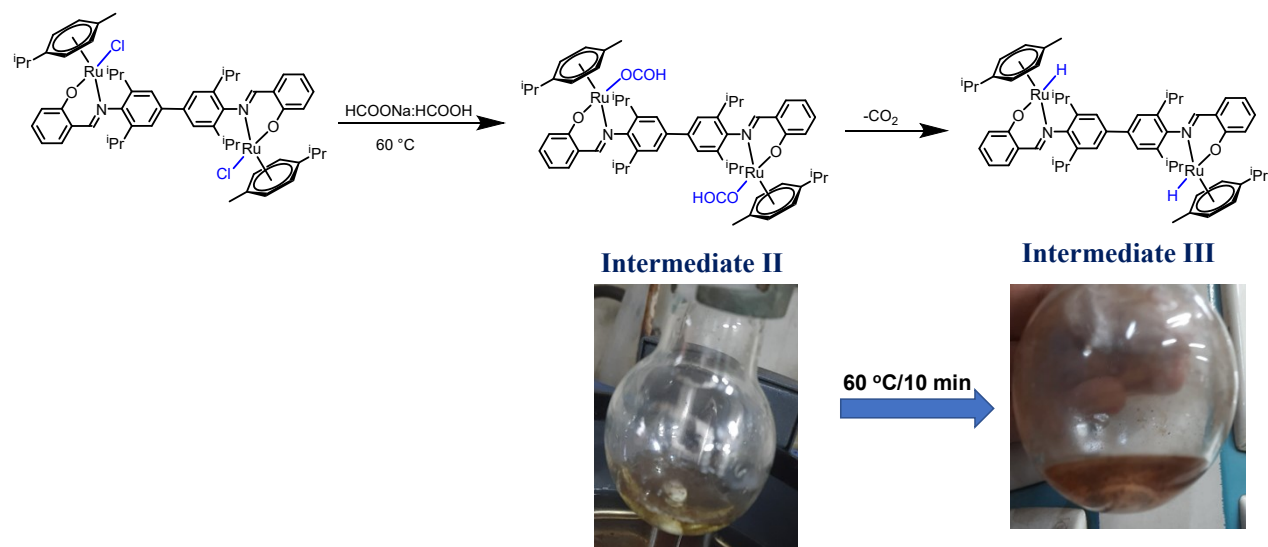

**Figure S13.** Catalytic intermediate for RA (picture showing the color change from pale yellow to brown during reaction).

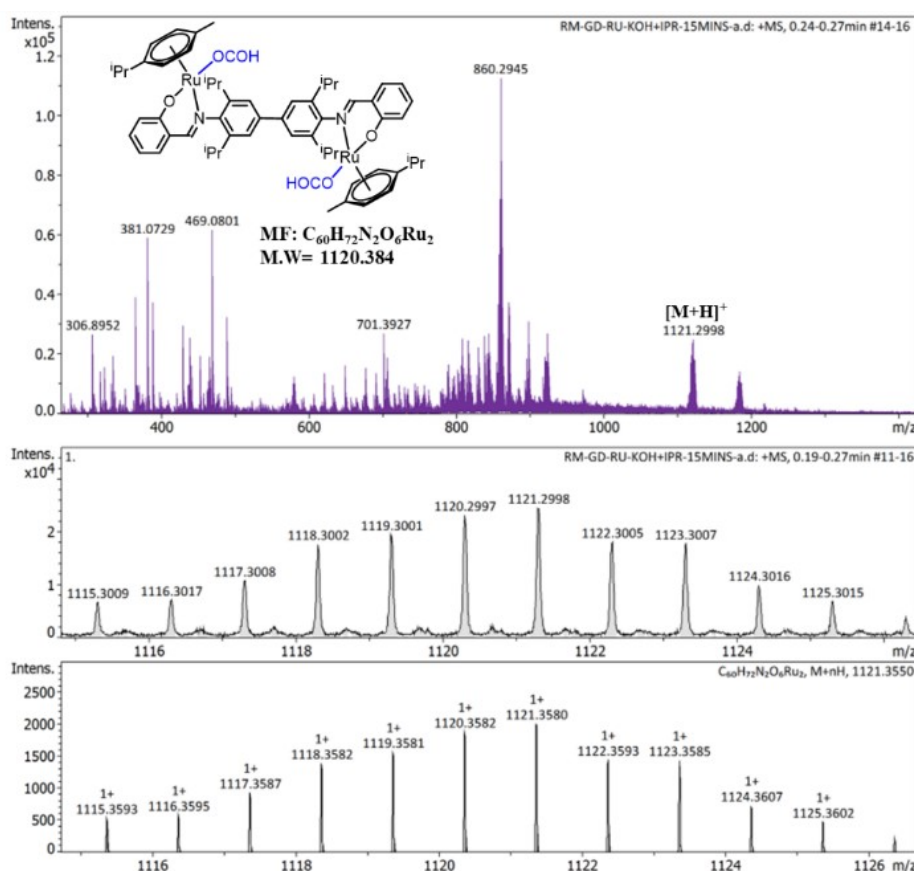

**Figure S14.** ESI-MS spectrum of intermediate **II** in methanol showing experimental and simulated pattern for  $[M+H]^+$  ion at  $m/z$  1121.2998.

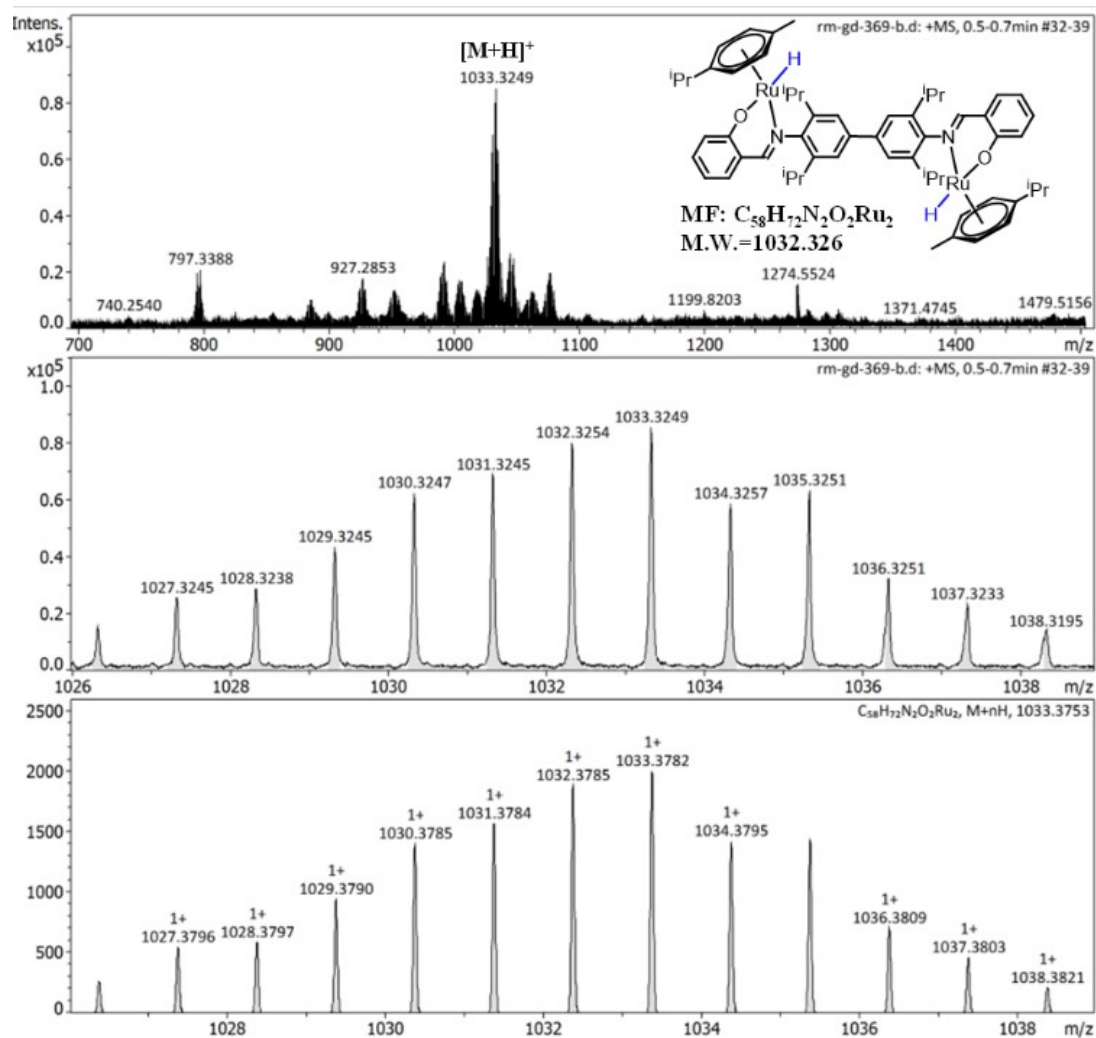

**Figure S15.** ESI-MS spectrum of intermediate **III** in methanol showing experimental and simulated pattern for  $[M+H]^+$  ion at  $m/z$  1033.3249.

**Table S2.** Comparison of reaction parameter with selected complexes for reductive amination reaction

| Sr. No. | Catalyst                                                                            | mol%   | Additives                                              | Solvent                                    | Time (h)/Temp. (°C) | Yield (%) | TON    | TOF (h <sup>-1</sup> ) | Reference           |
|---------|-------------------------------------------------------------------------------------|--------|--------------------------------------------------------|--------------------------------------------|---------------------|-----------|--------|------------------------|---------------------|
| 1       | 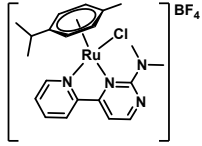   | 1.5    | -                                                      | <i>i</i> PrOH                              | 6/90                | 60        | 40     | 7                      | S5                  |
| 2       |    | 0.5    | HCOOH:HCOONa (pH 4.4)                                  | H <sub>2</sub> O: Toluene                  | 4 / 80              | 63        | 126    | 32                     | S6                  |
| 3       |    | 2      | AcOH, H <sub>2</sub> 30 bar                            | MeOH                                       | 4 / 80              | 87        | 44     | 22                     | S7                  |
| 4       |   | 1      | HCOOH:HCOONa (pH 4.8)                                  | H <sub>2</sub> O                           | 1/80                | 53        | 53     | 27                     | S8                  |
| 5       |  | 1      | PhSiH <sub>3</sub> , 4 Å molecular sieves              | Ethanol                                    | 0.5/30              | 97        | 97     | 194                    | S9                  |
| 6       |  | 0.1    | HCOOH:HCOONa (pH 4.8) or H <sub>2</sub> 3 bar          | H <sub>2</sub> O or MeOH: H <sub>2</sub> O | 5/60                | 92        | 920    | 184                    | S10                 |
| 7       |  | 0.05   | tris( <i>p</i> -chlorophenyl) phosphine, 50 bar CO/ KI | THF                                        | 20/160              | 77        | 1540   | 77                     | S11                 |
| 8       |  | 0.05   | HCOOH:HCOONa (pH 3.5)                                  | H <sub>2</sub> O                           | 4/80                | 96        | 1920   | 480                    | <b>Present Work</b> |
|         |                                                                                     | 0.0001 |                                                        |                                            |                     | 43        | 430000 | 107500                 |                     |

**Table S3.** Comparison of green metrics with selected complexes for reductive amination reaction.

| Sr. No. | Catalyst                                                                            | Atom economy (%) | Atom efficiency (%) | Reaction mass efficiency (%) | Reference           |
|---------|-------------------------------------------------------------------------------------|------------------|---------------------|------------------------------|---------------------|
| 1       | 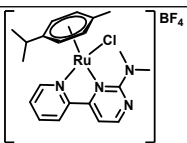   | 91.97            | 55.18               | 55.27                        | S5                  |
| 2       |    |                  | 57.94               | 57.93                        | S6                  |
| 3       |    |                  | 79.98               | 80.42                        | S7                  |
| 4       |   |                  | 57.62               | 48.64                        | S8                  |
| 5       |  |                  | 84.72               | 84.67                        | S10                 |
| 6       |  |                  | 70.07               | 70.82                        | S11                 |
| 7       |  |                  | <b>89.21</b>        | <b>89.69</b>                 | <b>Present Work</b> |



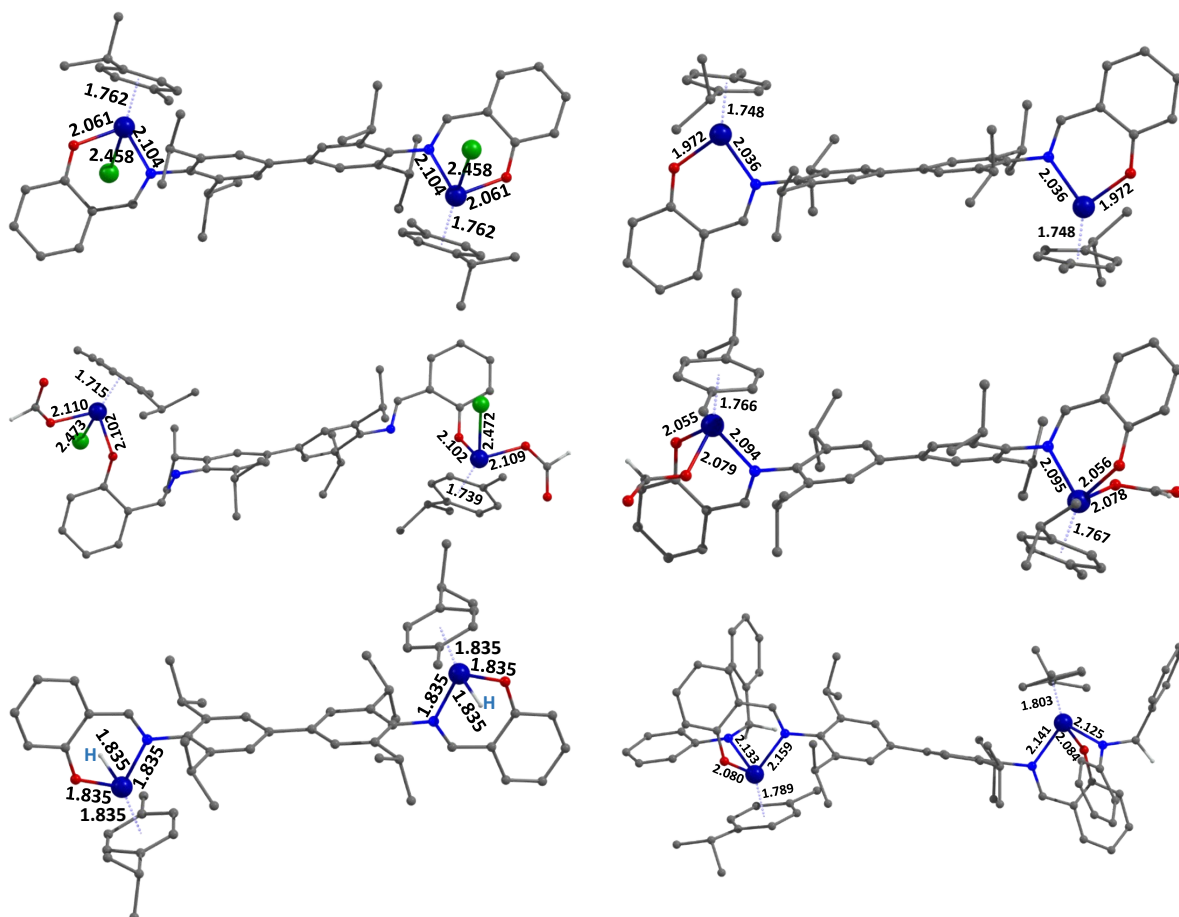

**Figure S16.** The DFT optimized geometry and structural parameters for bimetallic study for both active sides.

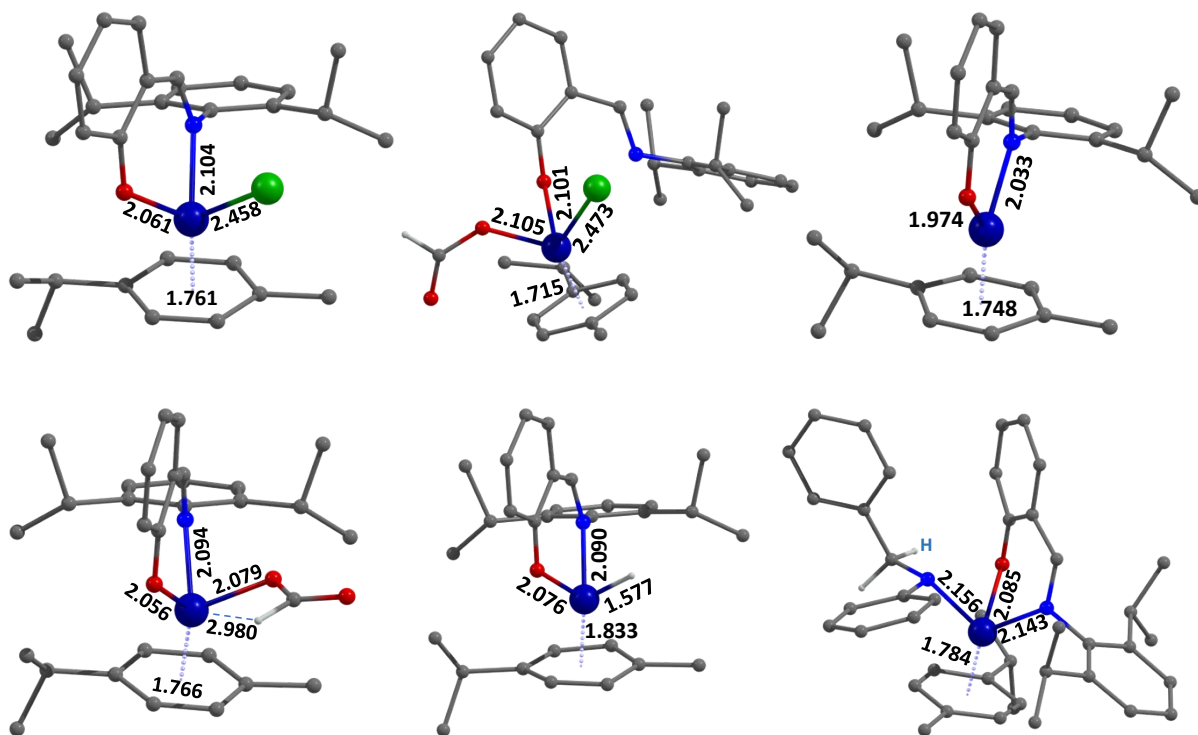

**Figure S17.** The DFT optimized geometry and structural parameters for monometallic study.

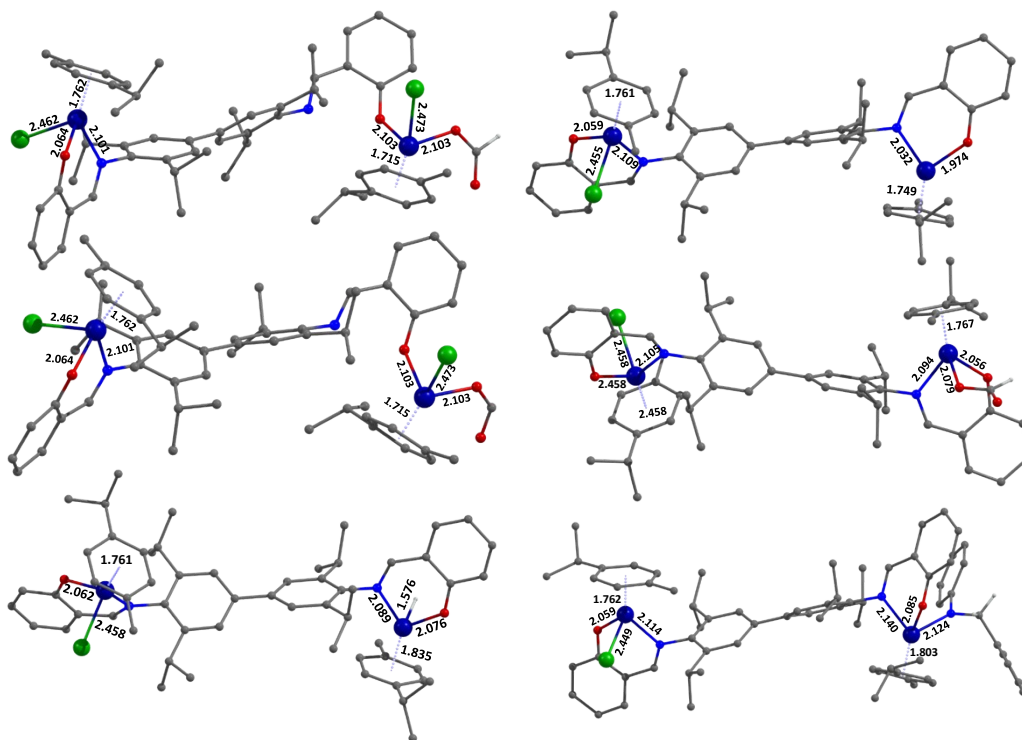

**Figure S18.** The DFT optimized geometry and structural parameters for bimetallic study for one active side.

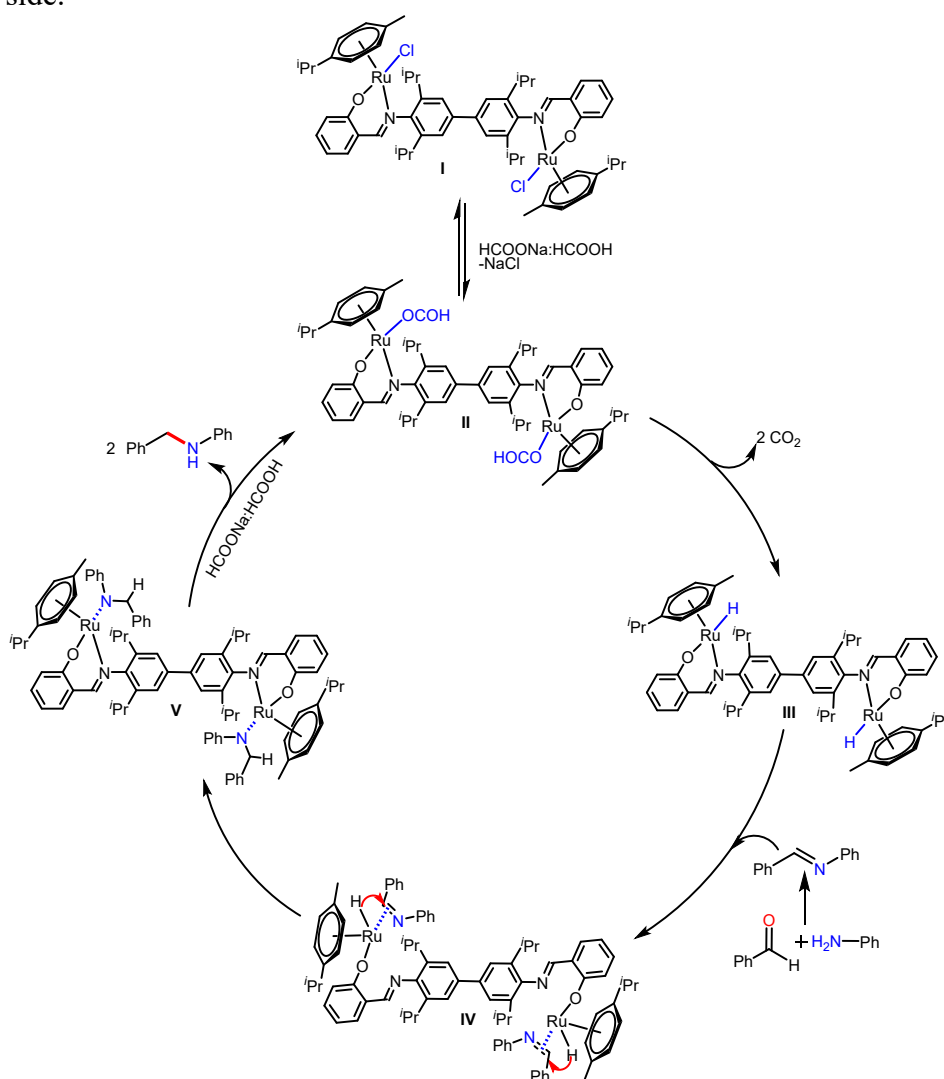

**Scheme S1.** Proposed a mechanism for reductive amination with **Ru1** catalyst.

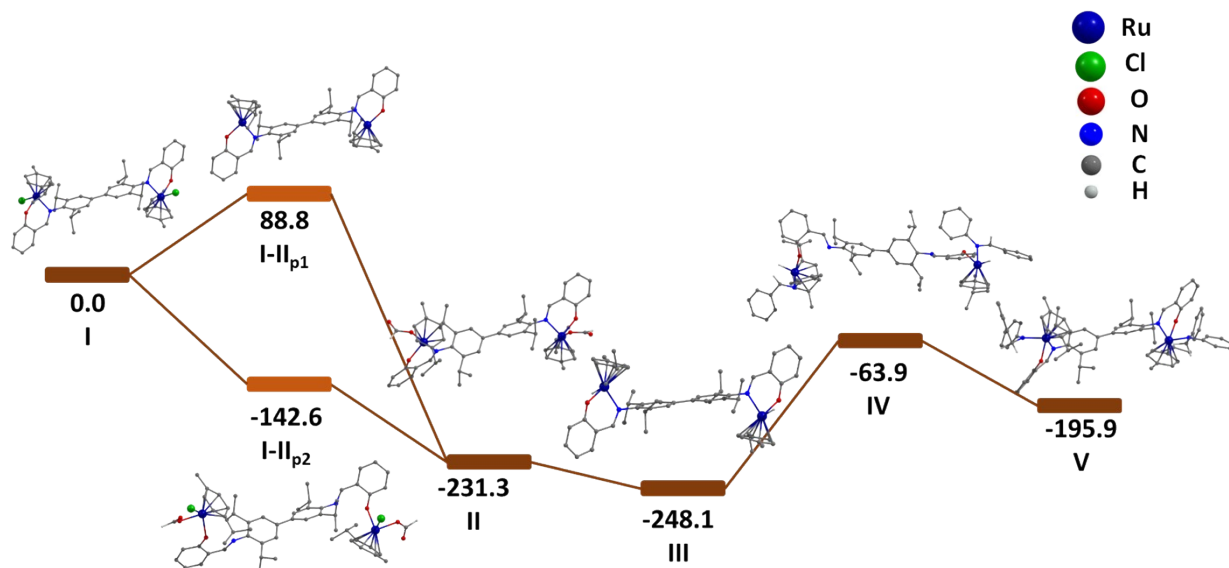

**Figure S19:** DFT-computed potential energy diagram (kJ/mol) of the reductive amination for the bimetallic study.

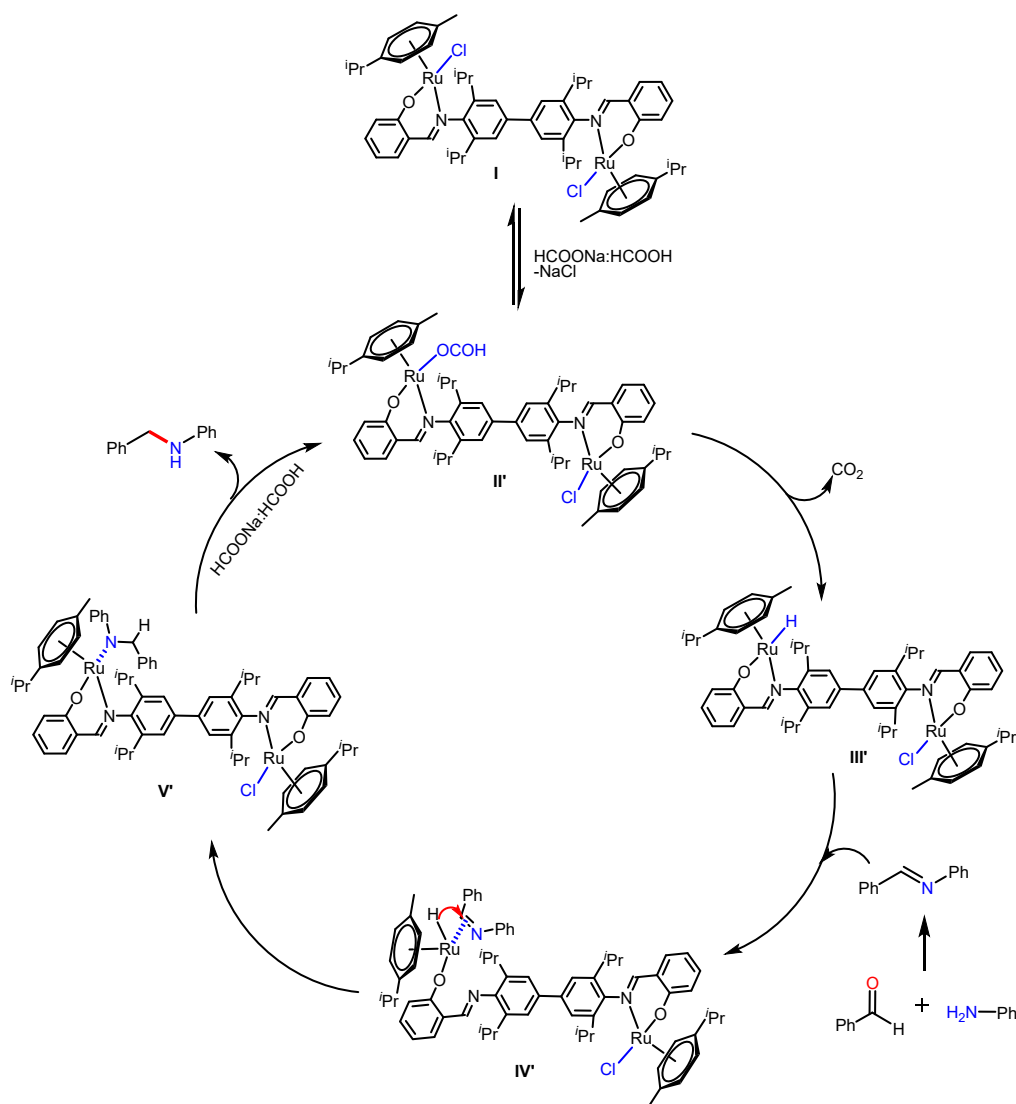

**Scheme S2.** Proposed a mechanism for reductive amination with **Ru1** catalyst at one side of Ru center

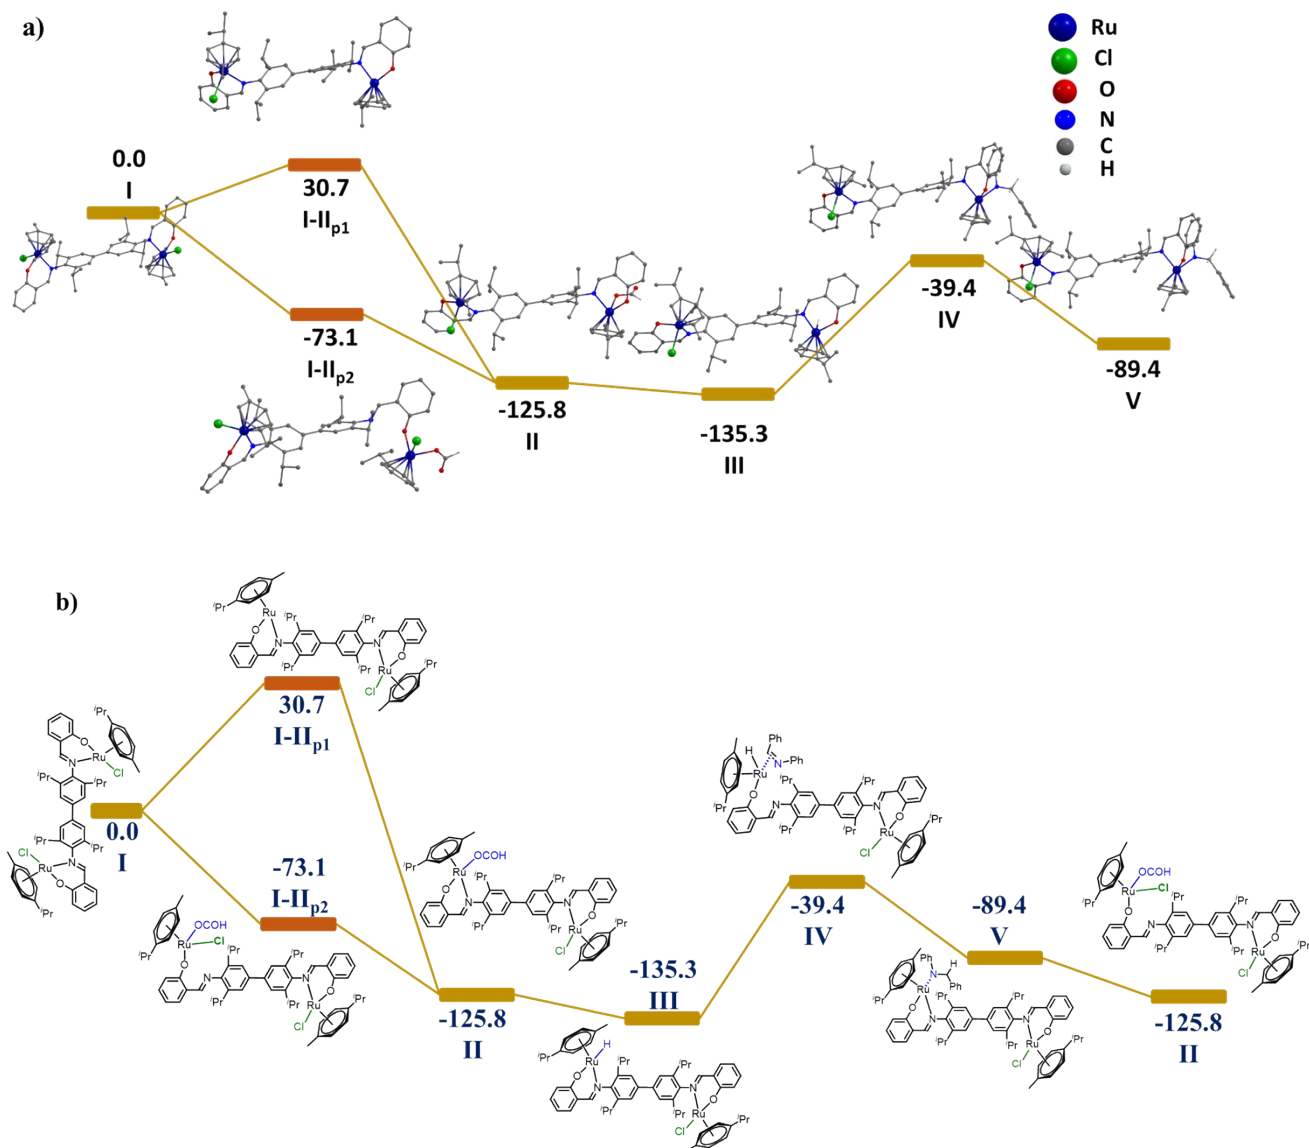

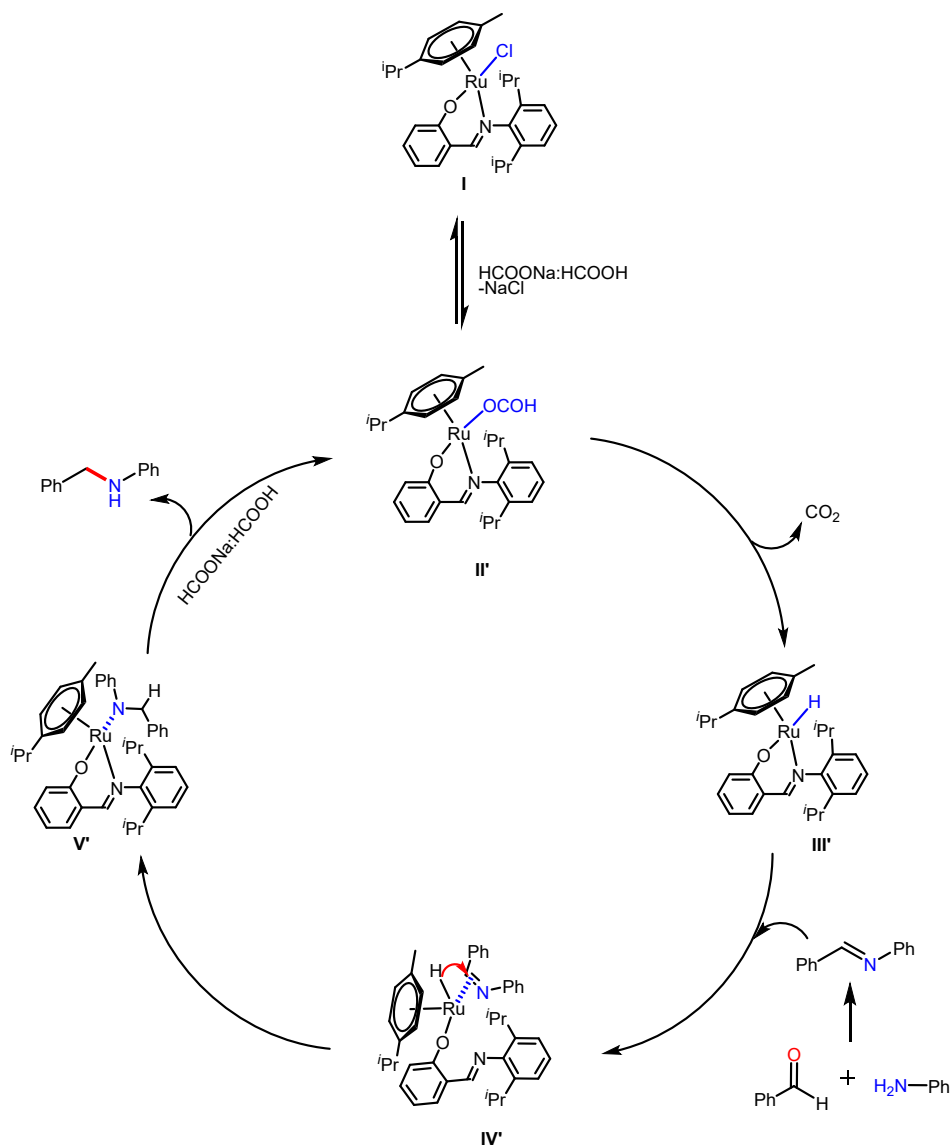

**Scheme S3.** Proposed a mechanism for reductive amination with **Ru2** catalyst.

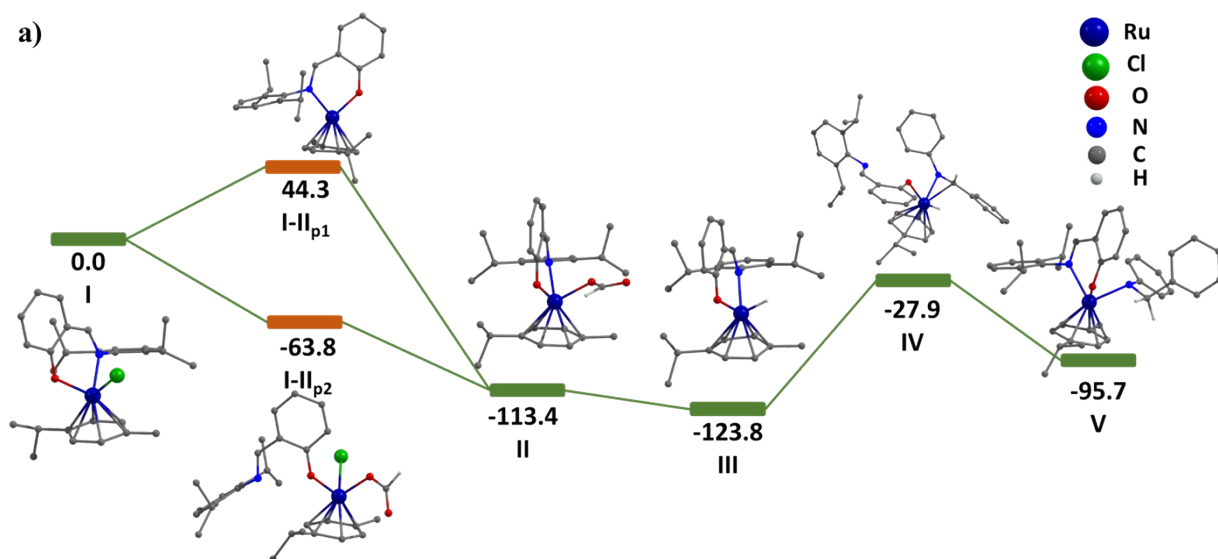

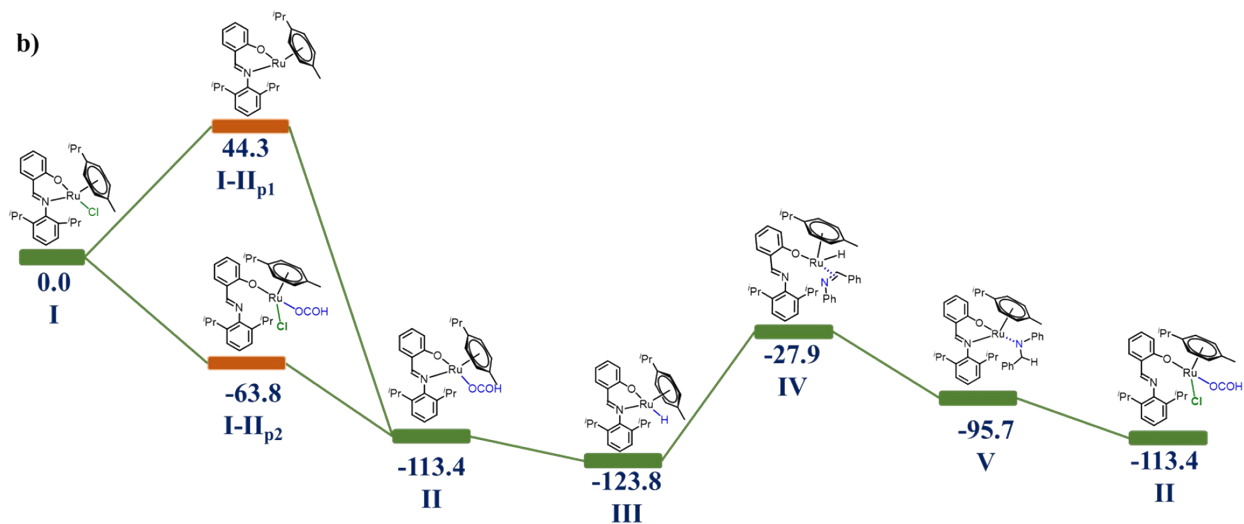

**Figure S21:** a) DFT-computed potential energy diagram (kJ/mol) of the reductive amination for the **Ru2** monometallic study. (b) The corresponding Chemdraw energy profile

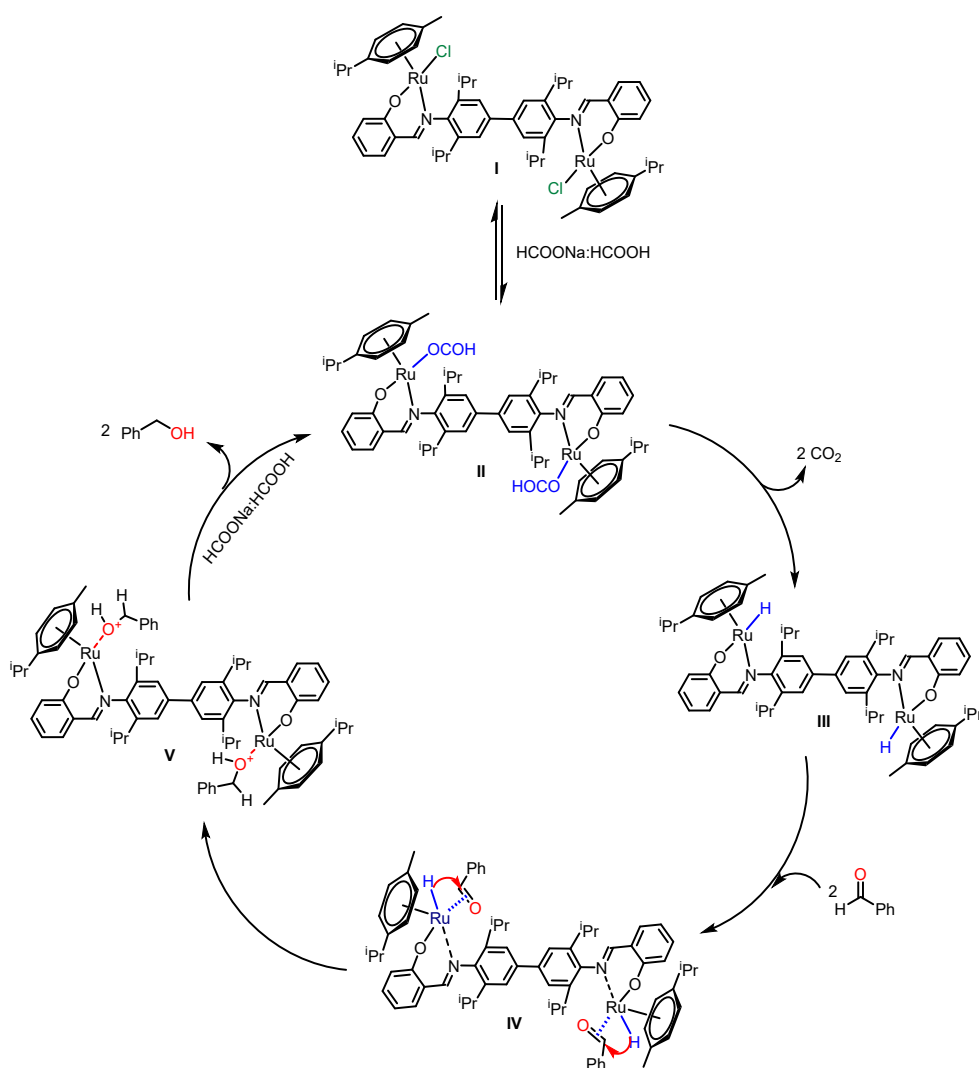

**Scheme S4.** Proposed a mechanism for alcohol formation with **Ru2** catalyst.

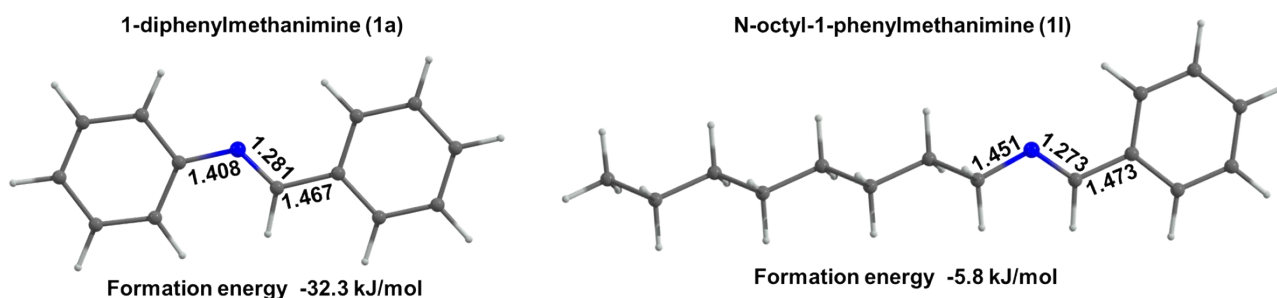

**Figure S22** Optimized geometry of substrate **1a** and **11** and their formation energies.

**Table S4:** Compression of the structural parameter optimized geometry with experiments

| <b>Ru1</b>               | <b>Experimental Data</b> | <b>Computational Data</b> |
|--------------------------|--------------------------|---------------------------|
| Ru(1)- Cl(1)             | 2.435                    | 2.458                     |
| Ru(1)- O(1)              | 2.047                    | 2.061                     |
| Ru(1)- N(1)              | 2.108                    | 2.104                     |
| Ru(1) - <i>p</i> -cymene | 1.680                    | 1.762                     |
| ∠O(1)-Ru(1)-Cl(1)        | 83.47                    | 85.2                      |
| ∠O(1)-Ru(1)-N(1)         | 86.81                    | 86.7                      |
| ∠N(1)-Ru(1)-Cl(1)        | 84.76                    | 86.3                      |
| ∠C(21)-C(21)-C(22)-C(23) | 176.8                    | 179.1                     |
| <b>Ru2</b>               | <b>Experimental Data</b> | <b>Computational Data</b> |
| Ru(1)- Cl(1)             | 2.438                    | 2.458                     |
| Ru(1)- O(1)              | 2.056                    | 2.061                     |
| Ru(1)- N(1)              | 2.107                    | 2.104                     |
| Ru(1) - <i>p</i> -cymene | 1.680                    | 1.761                     |
| ∠O(1)-Ru(1)-Cl(1)        | 82.99                    | 85.2                      |
| ∠O(1)-Ru(1)-N(1)         | 87.60                    | 86.6                      |
| ∠N(1)-Ru(1)-Cl(1)        | 85.81                    | 86.4                      |

**Table S5.** Crystallographic details of complex **Ru1** and **Ru2**.

| Compound            | <b>Ru1</b>                                                                                    | <b>Ru2</b>                             |
|---------------------|-----------------------------------------------------------------------------------------------|----------------------------------------|
| Identification code | RM_GD_241_0m                                                                                  | RM_GD_312                              |
| Empirical formula   | C <sub>63</sub> H <sub>70</sub> Cl <sub>2</sub> N <sub>2</sub> O <sub>5</sub> Ru <sub>2</sub> | C <sub>29</sub> H <sub>36</sub> ClNORu |
| Formula weight      | 1208.35                                                                                       | 551.11                                 |
| Temperature/K       | 150.00                                                                                        | 104.5(7)                               |
| Crystal system      | triclinic                                                                                     | monoclinic                             |
| Space group         | <i>P</i> $\bar{1}$                                                                            | <i>P</i> 2 <sub>1</sub> / <i>n</i>     |
| <i>a</i> /Å         | 10.829(1)                                                                                     | 11.3984(1)                             |
| <i>b</i> /Å         | 11.297(1)                                                                                     | 12.3026(1)                             |
| <i>c</i> /Å         | 12.205(1)                                                                                     | 18.3366(2)                             |
| $\alpha$ /°         | 82.474(4)                                                                                     | 90                                     |
| $\beta$ /°          | 89.037(4)                                                                                     | 99.3510(10)                            |

|                                                |                                                               |                                                               |
|------------------------------------------------|---------------------------------------------------------------|---------------------------------------------------------------|
| $\gamma/^\circ$                                | 78.850(4)                                                     | 90                                                            |
| Volume/ $\text{\AA}^3$                         | 1452.3(3)                                                     | 2537.17(4)                                                    |
| Z                                              | 1                                                             | 4                                                             |
| $\rho_{\text{calc}}/\text{g/cm}^3$             | 1.400                                                         | 1.443                                                         |
| $\mu/\text{mm}^{-1}$                           | 0.662                                                         | 0.745                                                         |
| F(000)                                         | 640.0                                                         | 1144.0                                                        |
| Crystal size/ $\text{mm}^3$                    | $0.461 \times 0.311 \times 0.192$                             | $0.201 \times 0.057 \times 0.023$                             |
| Radiation                                      | MoK $\alpha$ ( $\lambda = 0.71073$ )                          | Mo K $\alpha$ ( $\lambda = 0.71073$ )                         |
| 2 $\Theta$ range for data collection/ $^\circ$ | 5.08 to 50.28                                                 | 4.502 to 50.038                                               |
| Index ranges                                   | $-12 \leq h \leq 12, -13 \leq k \leq 13, -14 \leq l \leq 14$  | $-13 \leq h \leq 13, -14 \leq k \leq 14, -21 \leq l \leq 21$  |
| Reflections collected                          | 51543                                                         | 44264                                                         |
| Independent reflections                        | 5178 [ $R_{\text{int}} = 0.0486, R_{\text{sigma}} = 0.0238$ ] | 4454 [ $R_{\text{int}} = 0.0357, R_{\text{sigma}} = 0.0150$ ] |
| Data/restraints/parameters                     | 5178/6/322                                                    | 4454/0/305                                                    |
| Goodness-of-fit on $F^2$                       | 1.119                                                         | 1.033                                                         |
| Final R indexes [ $I \geq 2\sigma(I)$ ]        | $R_1 = 0.0555, wR_2 = 0.1455$                                 | $R_1 = 0.0212, wR_2 = 0.0542$                                 |
| Final R indexes [all data]                     | $R_1 = 0.0635, wR_2 = 0.1523$                                 | $R_1 = 0.0221, wR_2 = 0.0549$                                 |
| Largest diff. peak/hole / $e \text{\AA}^{-3}$  | 1.55/-0.7                                                     | 0.45/-0.43                                                    |

**Table S6.** Selected bond distances ( $\text{\AA}$ ) and angles ( $^\circ$ ) in compound **Ru1**.

|              |           |                    |          |
|--------------|-----------|--------------------|----------|
| Ru(1)-Cl(1)  | 2.439(1)  | O(1)- Ru(1)- Cl(1) | 83.5(1)  |
| Ru(1)-O(1)   | 2.051(3)  | O(1)- Ru(1)- N(1)  | 86.8 (1) |
| Ru(1)-N(1)   | 2.114(4)  | N(1)- Ru(1)- Cl(1) | 84.8(1)  |
| Ru(1)- C(20) | 2.204(5)  | C(1)- O(1)- Ru(1)  | 127.7(3) |
| Ru(1)- C(21) | 2.176(5)  | C(7)-N(1)- Ru(1)   | 124.3(3) |
| Ru(1)- C(22) | 2.189(5)  | C(7)-N(1)-(C8)     | 116.5(4) |
| Ru(1)- C(23) | 2.201(5)  | C(8)-N(1)- Ru(1)   | 119.0(3) |
| Ru(1)- C(24) | 2.203(5)  |                    |          |
| Ru(1)- C(25) | 2.189 (5) |                    |          |
| N(1)- C(7)   | 1.291(6)  |                    |          |
| N(1)- C(8)   | 1.453(6)  |                    |          |

**Table S7.** Selected bond distances ( $\text{\AA}$ ) and angles ( $^\circ$ ) in compound **Ru2**.



|              |           |                    |           |
|--------------|-----------|--------------------|-----------|
| Ru(1)-Cl(1)  | 2.4385(4) | O(1)- Ru(1)- Cl(1) | 82.99(4)  |
| Ru(1)-O(1)   | 2.057(1)  | O(1)- Ru(1)- N(1)  | 87.60(5)  |
| Ru(1)-N(1)   | 2.107(2)  | N(1)- Ru(1)- Cl(1) | 85.81(4)  |
| Ru(1)- C(20) | 2.21(2)   | C(1)- O(1)- Ru(1)  | 126.94(1) |
| Ru(1)- C(21) | 2.202(2)  | C(7)-N(1)- Ru(1)   | 123.63(1) |
| Ru(1)- C(22) | 2.214(2)  | C(7)-N(1)-(C8)     | 116.83(2) |
| Ru(1)- C(23) | 2.194(2)  | C(8)-N(1)- Ru(1)   | 119.42(1) |
| Ru(1)- C(24) | 2.185(2)  |                    |           |
| Ru(1)- C(25) | 2.175(2)  |                    |           |
| N(1)- C(7)   | 1.296(2)  |                    |           |
| N(1)- C(8)   | 1.296(2)  |                    |           |

### Calculation of green metrics for reductive amination optimized substrate

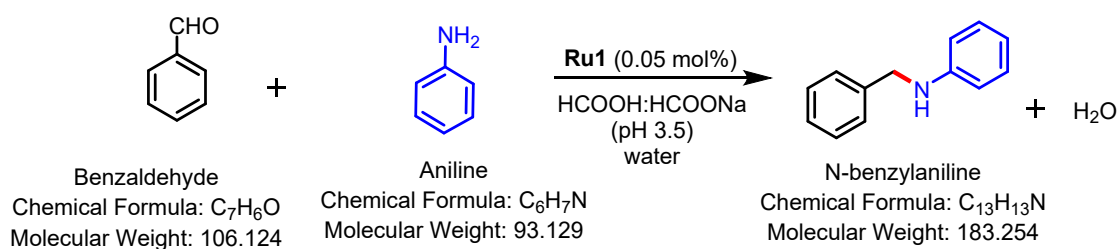

$$\text{Total} = 106.124 + 93.129 = 199.253$$

$$\text{Product yield} = 97\% (178.5 \text{ mg})$$

|             |                 |        |                     |
|-------------|-----------------|--------|---------------------|
| Reactant 1  | Benzaldehyde    | 106 mg | Formula wt. 106.124 |
| Reactant 1  | Aniline         | 93 mg  | F.W. 93.129         |
| Additives   | HCOONa:HCOOH    | 3 mL   | F.W. 105.01         |
| Solvent     | Water           | 2 mL   | F.W. 18.01          |
| Products    | N-benzylaniline | 178.5  | F.W. 183.254        |
| By products | Water           | -      | F.W. 18.01          |

Atom economy = Reactant total molecular weight / Product molecular weight

$$= 183.254 / 199.253 = 91.97 \%$$

Atom efficiency = Product yield × (atom economy/ 100)

$$= 97 \times (91.97/100) = 89.21\%$$

Carbon efficiency = No. C in product / no. total C in reactant = 100%

Reaction mass efficiency = Product experimental weight / total weight of reactant used

$$= 178.5 \text{ mg} / (106 + 93) \times 100 = 89.69\%$$

### Calculation of green metrics for gram scale reaction

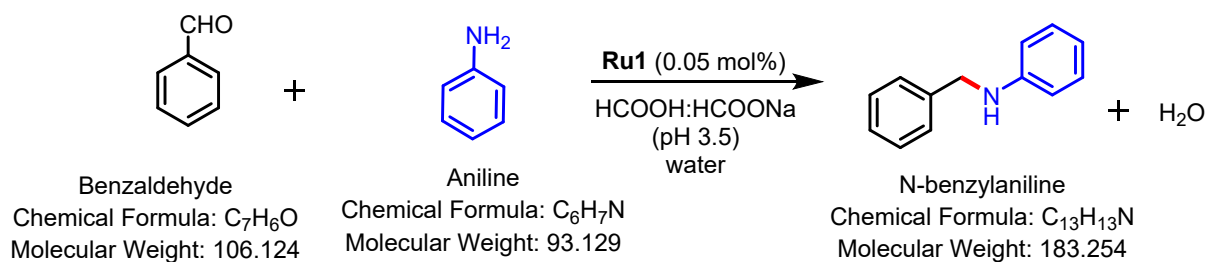

$$\text{Total} = 106.124 + 93.129 = 199.253$$

$$\text{Product yield} = 89\% (3.2 \text{ g})$$

|             |                 |        |                     |
|-------------|-----------------|--------|---------------------|
| Reactant 1  | Benzaldehyde    | 2.1 g  | Formula wt. 106.124 |
| Reactant 1  | Aniline         | 1.8 mg | F.W. 93.129         |
| Additives   | HCOONa:HCOOH    | 25 mL  | F.W. 105.01         |
| Solvent     | Water           | 15 mL  | F.W. 18.01          |
| Products    | N-benzylaniline | 3.2 g  | F.W. 183.254        |
| By products | Water           | -      | F.W. 18.01          |

Atom economy = Reactant total molecular weight / Product molecular weight

$$= 183.254 / 199.253 = 91.97 \%$$

Atom efficiency = Product yield × (atom economy/ 100)

$$= 89 \times (91.97/100) = 81.85\%$$

Carbon efficiency = No. C in product / no. total C in reactant = 100%

Reaction mass efficiency = Product experimental weight / total weight of reactant used

$$= 3.2 \text{ g} / (2.1 \text{ g} + 1.8 \text{ g}) \times 100 = 82.05\%$$

### NMR data for secondary amines product:

1.

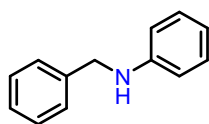

167 mg; 91% yield; <sup>1</sup>H NMR (400 MHz, CDCl<sub>3</sub>): δ 7.37-7.25 (m, 4H), 7.24-7.20 (m, 1H), 7.18-7.14 (m, 2H), 6.72-6.65 (m, 1H), 6.68-6.61 (m, 2H), 4.31 (s, 2H), 4.01 (br, 1H) ppm. <sup>13</sup>C NMR (100 MHz, CDCl<sub>3</sub>) δ 148.18, 139.46, 129.30, 128.67, 127.54, 127.26, 117.59, 112.87, 48.35 ppm.

2.

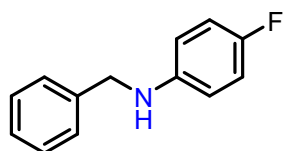

178 mg; 90% yield; <sup>1</sup>H NMR (400 MHz, CDCl<sub>3</sub>) δ 7.37 – 7.29 (m, 5H), 6.91-6.87 (m, 2H), 6.58-6.54 (m, 2H), 4.30 (s, 3H), 3.96 (s, 1H) ppm. <sup>13</sup>C NMR (100 MHz, CDCl<sub>3</sub>) δ 144.50, 139.26, 128.69, 127.51, 127.33, 115.80, 115.57, 113.70, 113.63, 48.95 ppm.

3.

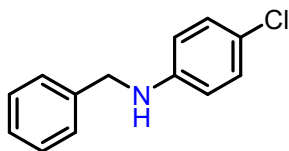

199 mg; 92% yield;  $^1\text{H}$  NMR (400 MHz,  $\text{CDCl}_3$ )  $\delta$  7.37 – 7.26 (m, 5H), 7.11 (d,  $J = 8.8$  Hz, 2H), 6.55 (d,  $J = 8.8$  Hz, 2H), 4.31 (s, 2H), 4.08 (s, 1H) ppm.  $^{13}\text{C}$  NMR (100 MHz,  $\text{CDCl}_3$ )  $\delta$  146.67, 138.96, 129.25, 129.09, 128.73, 127.43, 122.11, 114.03, 113.86, 48.36 ppm.

4.

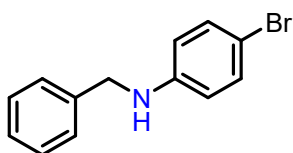

244 mg; 93% yield;  $^1\text{H}$  NMR (400 MHz,  $\text{CDCl}_3$ )  $\delta$  7.38 (d,  $J = 4.5$  Hz, 2H), 7.36 – 7.24 (m, 5H), 6.53 (d,  $J = 8.9$  Hz, 2H), 4.33 (s, 2H), 4.11 (s, 1H) ppm.  $^{13}\text{C}$  NMR (100 MHz,  $\text{CDCl}_3$ )  $\delta$  147.07, 138.87, 131.95, 128.72, 127.41, 114.43, 109.13, 48.24 ppm.

5.

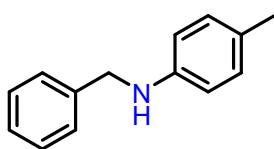

180 mg; 92% yield;  $^1\text{H}$  NMR (400 MHz,  $\text{CDCl}_3$ ):  $\delta$  7.44-7.33 (m, 5H), 6.64 (d,  $J = 7.3$  Hz, 2H), 6.61 (d,  $J = 7.6$  Hz, 2H), 4.36 (s, 2H) 3.95 (s, 1H), 2.31 (s, 3H) ppm.  $^{13}\text{C}$  NMR (100 MHz,  $\text{CDCl}_3$ )  $\delta$  146.01, 139.75, 129.83, 128.67, 127.57, 127.22, 126.79, 113.07, 48.69, 29.81, 20.49 ppm.

6.

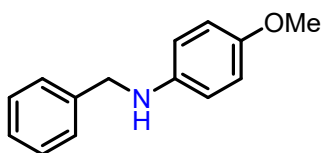

205 mg; 96% yield;  $^1\text{H}$  NMR (400 MHz,  $\text{CDCl}_3$ )  $\delta$  7.42 – 7.01 (m, 5H), 6.85 (d,  $J = 8.9$  Hz, 5H), 6.67 (d,  $J = 8.9$  Hz, 2H), 4.33 (s, 2H), 3.79 (s, 3H) ppm.  $^{13}\text{C}$  NMR (100 MHz,  $\text{CDCl}_3$ )  $\delta$  153.55, 128.58, 128.19, 127.51, 116.20, 114.80, 55.71, 50.41, 29.71, 22.60, 14.04 ppm.

7.

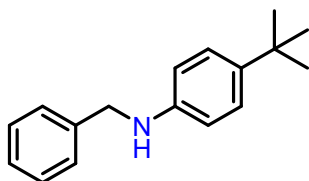

240 mg; 99% yield;  $^1\text{H}$  NMR (400 MHz,  $\text{CDCl}_3$ )  $\delta$  7.44 – 7.31 (m, 5H), 7.27 (d,  $J = 8.3$  Hz, 2H), 6.66 (d,  $J = 8.4$  Hz, 2H), 4.36 (s, 2H), 3.98 (s, 1H), 1.34 (s, 9H) ppm.  $^{13}\text{C}$  NMR (100 MHz,  $\text{CDCl}_3$ )  $\delta$  145.91, 140.35, 139.73, 128.65, 127.61, 127.22, 126.08, 112.59, 48.66, 31.91, 31.60 ppm.

8.

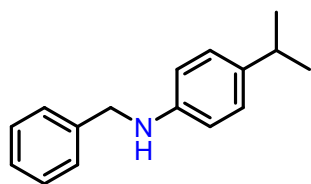

223 mg; 98% yield;  $^1\text{H NMR}$  (400 MHz,  $\text{CDCl}_3$ )  $\delta$  7.42 – 7.25 (m, 5), 7.09 (d,  $J = 8.5$  Hz, 2H), 6.64 (d,  $J = 8.4$  Hz, 2H), 4.34 (s, 3H), 3.04 – 2.64 (sept,  $J = 6.8$  Hz, 1H), 1.25 (d,  $J = 6.9$  Hz, 6H) ppm.  $^{13}\text{C NMR}$  (100 MHz,  $\text{CDCl}_3$ )  $\delta$  146.26, 139.70, 138.12, 128.61, 127.57, 127.19, 127.13, 112.89, 48.69, 33.18, 24.26 ppm.

9.

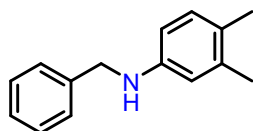

204 mg; 97% yield;  $^1\text{H NMR}$  (400 MHz,  $\text{CDCl}_3$ )  $\delta$  7.41 – 7.29 (m, 5H), 6.97 (s, 1H), 6.52 (s, 1H), 6.46 – 6.43 (m, 1H), 4.33 (s, 2H), 2.21 (s, 6H) ppm.  $^{13}\text{C NMR}$  (100 MHz,  $\text{CDCl}_3$ )  $\delta$  146.42, 139.81, 137.38, 130.33, 128.63, 127.55, 127.16, 125.61, 114.75, 110.26, 48.67, 20.12, 18.76 ppm.

10.

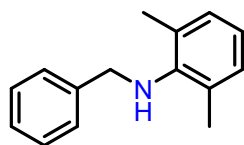

188 mg; 88% yield;  $^1\text{H NMR}$  (400 MHz,  $\text{CDCl}_3$ )  $\delta$  7.39 – 7.30 (m, 5H), 7.03 (d,  $J = 7.5$  Hz, 2H), 6.88 (t,  $J = 7.4$  Hz, 1H), 4.12 (s, 2H), 2.29 (s, 3H) ppm.  $^{13}\text{C NMR}$  (100 MHz,  $\text{CDCl}_3$ )  $\delta$  145.91, 140.46, 129.85, 128.85, 128.59, 127.99, 127.30, 122.21, 52.90, 18.48 ppm.

11.

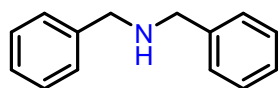

162 mg; 82% yield;  $^1\text{H NMR}$  (400 MHz,  $\text{CDCl}_3$ )  $\delta$  7.38 – 6.87 (m, 10H), 3.82 (s, 4H) ppm.  $^{13}\text{C NMR}$  (100 MHz,  $\text{CDCl}_3$ )  $\delta$  138.91, 133.18, 132.69, 121.72, 53.47 ppm.

12.

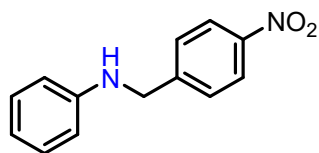

223 mg; 98% yield;  $^1\text{H NMR}$  (400 MHz,  $\text{CDCl}_3$ )  $\delta$  8.21 (d,  $J = 4.8$  Hz, 2H), 7.55 (d,  $J = 8.9$  Hz, 2H), 7.17 (t,  $J = 7.6$  Hz, 2H), 6.75 – 6.69 (m, 1H), 6.59 (d,  $J = 7.8$  Hz, 2H), 4.48 (s, 2H), 4.25 (s, 1H) ppm.  $^{13}\text{C NMR}$  (100 MHz,  $\text{CDCl}_3$ )  $\delta$  147.47, 147.31, 129.41, 127.71, 123.91, 118.26, 112.93, 47.65 ppm.

13.

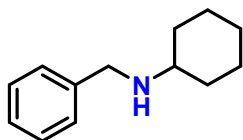

180 mg; 95% yield;  $^1\text{H NMR}$  (400 MHz,  $\text{CDCl}_3$ )  $\delta$  7.20 (t,  $J = 7.1$  Hz, 2H), 6.10 (t,  $J = 6.9$  Hz, 1H), 6.14 (d,  $J = 7.4$  Hz, 2H), 3.79 (s, 1H), 3.10 (d,  $J = 5.9$  Hz, 2H), 1.50 – 1.56 (m, 5H), 1.50-1.34 (m, 1H), 1.30 – 1.19 (m, 3H), 1.00-0.89 (m, 2H) ppm.  $^{13}\text{C NMR}$  (100 MHz,  $\text{CDCl}_3$ )  $\delta$  150.34, 130.52, 128.26, 113.59, 51.78, 36.39, 30.45, 27.00, 25.31 ppm.

14.

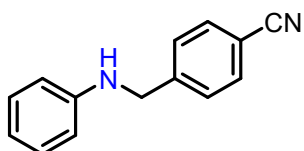

202 mg; 98% yield;  $^1\text{H NMR}$  (400 MHz,  $\text{CDCl}_3$ )  $\delta$  7.66 (d,  $J = 8.3$  Hz, 2H), 7.50 (d,  $J = 8.5$  Hz, 2H), 7.26 – 7.12 (m, 2H), 6.84 – 6.52 (m, 3H), 4.46 (s, 2H), 4.22 (s, 1H) ppm.  $^{13}\text{C NMR}$  (100 MHz,  $\text{CDCl}_3$ )  $\delta$  147.40, 145.38, 132.48, 129.41, 127.74, 127.65, 118.89, 113.00, 112.78, 110.97, 47.82 ppm.

15.

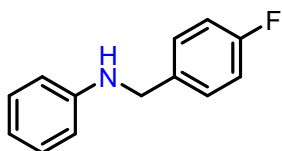

180 mg; 88% yield;  $^1\text{H NMR}$  (400 MHz,  $\text{CDCl}_3$ )  $\delta$  7.38 – 7.31 (m, 2H), 7.22 – 7.14 (m, 2H), 7.05 (t,  $J = 8.7$  Hz, 2H), 6.75 (t,  $J = 7.3$  Hz, 1H), 6.66 (d,  $J = 7.6$  Hz, 2H), 4.33 (s, 2H), 4.05 (s, 1H) ppm.  $^{13}\text{C NMR}$  (100 MHz,  $\text{CDCl}_3$ )  $\delta$  147.95, 135.13, 129.30, 128.97, 117.76, 115.56, 115.35, 112.89, 47.63 ppm.

16.

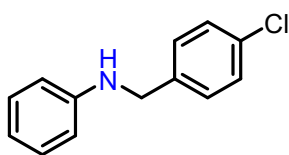

198 mg; 90% yield;  $^1\text{H NMR}$  (400 MHz,  $\text{CDCl}_3$ )  $\delta$  7.38 – 7.17 (m, 5H), 6.75 (d,  $J = 7.3$  Hz, 2H), 6.63 (d,  $J = 7.6$  Hz, 2H), 4.33 (s, 2H), 4.05 (s, 1H) ppm.  $^{13}\text{C NMR}$  (100 MHz,  $\text{CDCl}_3$ )  $\delta$  147.85, 138.02, 132.88, 129.32, 128.77, 128.71, 128.29, 117.83, 112.91, 47.63 ppm.

17.

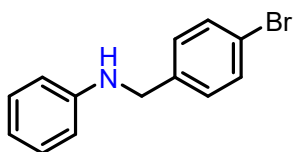

242 mg; 92% yield;  $^1\text{H NMR}$  (400 MHz,  $\text{CDCl}_3$ )  $\delta$  7.47 (d,  $J = 8.4$  Hz, 2H), 7.32 – 7.09 (m, 5H), 6.62 (d,  $J = 7.6$  Hz, 2H), 4.30 (s, 2H), 3.20 (s, 2H) ppm.  $^{13}\text{C NMR}$  (100 MHz,  $\text{CDCl}_3$ )  $\delta$  147.84, 138.60, 131.73, 129.35, 129.09, 120.94, 117.86, 112.94, 47.667 ppm.

18.

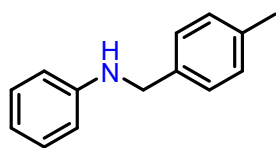

173 mg; 88% yield;  $^1\text{H NMR}$  (400 MHz,  $\text{CDCl}_3$ )  $\delta$  7.22 – 7.15 (m, 5H), 6.73 (d,  $J = 8.4$  Hz, 2H), 6.66 (d,  $J = 7.6$  Hz, 2H), 4.31 (s, 2H), 2.37 (s, 3H) ppm.  $^{13}\text{C NMR}$  (100 MHz,  $\text{CDCl}_3$ )  $\delta$  148.25, 136.90, 136.38, 129.34, 129.28, 127.56, 117.52, 112.87, 48.11, 21.14 ppm.

19.

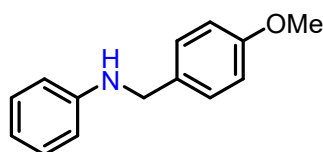

200 mg; 93% yield;  $^1\text{H NMR}$  (400 MHz,  $\text{CDCl}_3$ )  $\delta$  7.35 (d,  $J = 8.7$  Hz, 2H), 7.23 (t,  $J = 15.6$  Hz, 2H), 6.94 (d,  $J = 8.67$  Hz, 2H), 6.72 (dd,  $J = 1.8, 2.7$  Hz, 3H), 4.30 (s, 2H), 3.85 (s, 3H) ppm.  $^{13}\text{C NMR}$  (100 MHz,  $\text{CDCl}_3$ )  $\delta$  158.88, 148.25, 131.45, 129.29, 128.85, 117.54, 115.16, 112.88, 55.34, 47.82 ppm.

20.

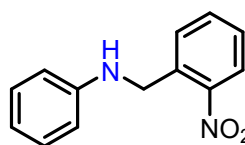

206 mg; 90% yield;  $^1\text{H NMR}$  (400 MHz,  $\text{CDCl}_3$ )  $\delta$  8.09 (d,  $J = 8.1$  Hz, 1H), 7.71 (d,  $J = 8.3$  Hz, 1H), 7.59 (t,  $J = 7.0$  Hz, 1H), 7.45 (t,  $J = 7.7$  Hz, 1H), 7.26 – 7.12 (m, 2H), 6.75 (t,  $J = 7.3$  Hz, 1H), 6.60 (d,  $J = 8.6$  Hz, 1H), 4.76 (s, 2H), 4.38 (s, 1H) ppm.  $^{13}\text{C NMR}$  (100 MHz,  $\text{CDCl}_3$ )  $\delta$  147.37, 135.70, 133.71, 129.79, 129.36, 128.00, 125.22, 118.04, 112.89, 45.78 ppm.

21.

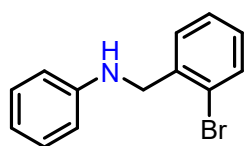

225 mg; 86% yield;  $^1\text{H NMR}$  (400 MHz,  $\text{CDCl}_3$ )  $\delta$  7.62 (d,  $J = 9.1$  Hz, 1H), 7.45 (d,  $J = 7.4$  Hz, 1H), 7.31-7.20 (m, 5H), 6.79 (d,  $J = 9.5$  Hz, 2H), 4.44 (s, 2H) ppm.  $^{13}\text{C NMR}$  (100 MHz,  $\text{CDCl}_3$ )  $\delta$  147.73, 138.21, 132.84, 129.33, 129.19, 128.72, 127.60, 123.29, 117.89, 112.98, 48.43 ppm.

22.

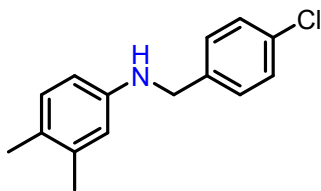

231 mg; 92% yield;  $^1\text{H}$  NMR (400 MHz,  $\text{CDCl}_3$ )  $\delta$  7.33 (s, 1H), 6.93 (d,  $J = 8.1$  Hz, 2H), 6.46 (d,  $J = 2.4$  Hz, 2H), 6.36 (d,  $J = 8.0$  Hz, 2H), 4.28 (s, 2H), 3.85 (s, 1H) ppm.  $^{13}\text{C}$  NMR (100 MHz,  $\text{CDCl}_3$ )  $\delta$  146.04, 138.37, 137.40, 130.32, 128.70, 128.28, 125.85, 114.77, 110.27, 47.93, 20.05, 18.69 ppm.

23.

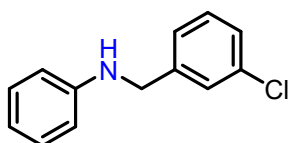

203 mg; 94% yield;  $^1\text{H}$  NMR (400 MHz,  $\text{CDCl}_3$ )  $\delta$  7.42 (s, 1H), 7.31-7.21 (m, 5H), 6.80 (t,  $J = 13.5$  Hz, 1H), 6.66 (d,  $J = 8.5$  Hz, 2H), 4.36 (s, 2H) ppm.  $^{13}\text{C}$  NMR (100 MHz,  $\text{CDCl}_3$ )  $\delta$  147.81, 141.78, 134.54, 129.95, 129.36, 127.44, 127.40, 125.45, 117.88, 112.93, 47.78 ppm.

24.

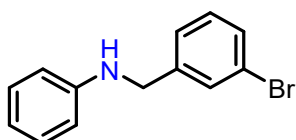

245 mg; 93% yield;  $^1\text{H}$  NMR (400 MHz,  $\text{CDCl}_3$ )  $\delta$  7.56 (s, 1H), 7.34-7.20 (m, 5H), 6.78 (t,  $J = 15.5$  Hz, 1H), 6.66 (d,  $J = 8.5$  Hz, 2H), 4.34 (s, 2H) ppm.  $^{13}\text{C}$  NMR (100 MHz,  $\text{CDCl}_3$ )  $\delta$  147.79, 142.05, 130.33, 130.25, 129.36, 125.92, 122.79, 120.93, 117.89, 112.93, 47.74 ppm.

25.

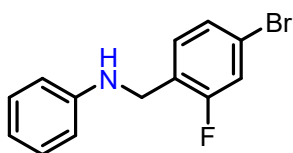

255 mg; 89% yield;  $^1\text{H}$  NMR (400 MHz,  $\text{CDCl}_3$ )  $\delta$  7.29-7.19 (m, 5H), 6.79 (t,  $J = 7.3$  Hz, 1H), 6.66 (d,  $J = 8.6$  Hz, 2H), 4.39 (s, 2H), 4.10 (s, 1H) ppm.  $^{13}\text{C}$  NMR (100 MHz,  $\text{CDCl}_3$ )  $\delta$  147.47, 130.45, 129.35, 127.54, 125.79, 120.91, 119.13, 118.89, 118.04, 112.95, 41.48 ppm.

26.

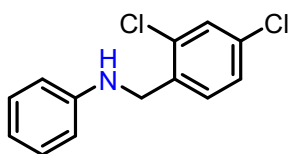

231 mg; 92% yield;  $^1\text{H}$  NMR (400 MHz,  $\text{CDCl}_3$ )  $\delta$  7.50 – 7.26 (m, 2H), 7.18 (d,  $J = 10.9$  Hz, 3H), 6.79 – 6.68 (m, 1H), 6.61 (d,  $J = 8.6$  Hz, 2H), 4.78 (s, 2H), 4.43 (s, 1H)

ppm.  $^{13}\text{C}$  NMR (100 MHz,  $\text{CDCl}_3$ )  $\delta$  147.44, 135.37, 133.74, 129.74, 129.35, 129.31, 127.22, 118.00, 112.92, 45.45 ppm.

27.

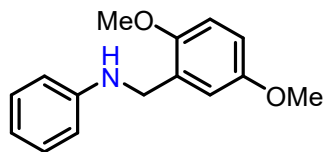

236 mg; 97% yield;  $^1\text{H}$  NMR (400 MHz,  $\text{CDCl}_3$ )  $\delta$  7.23 (dd,  $J = 8.8$  Hz, 2H), 6.99 (s, 1H), 6.86 – 6.70 (m, 5H), 4.37 (s, 2H), 3.88 (s, 3H), 3.79 (s, 3H) ppm.  $^{13}\text{C}$  NMR (100 MHz,  $\text{CDCl}_3$ )  $\delta$  153.68, 151.62, 148.41, 129.34, 128.69, 118.57, 117.48, 115.34, 113.17, 112.23, 111.25, 55.92, 55.74, 43.55 ppm.

28.

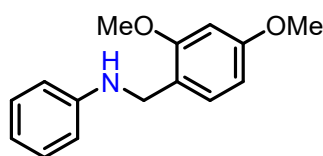

206 mg; 84% yield;  $^1\text{H}$  NMR (400 MHz,  $\text{CDCl}_3$ )  $\delta$  7.24 (s, 1H), 7.23 – 7.15 (m, 2H), 6.83 – 6.62 (m, 2H), 6.51 (d,  $J = 2.3$  Hz, 1H), 6.46 (dd,  $J = 8.2, 2.4$  Hz, 2H), 4.28 (s, 2H), 3.86 (s, 3H), 3.83 (s, 3H) ppm.  $^{13}\text{C}$  NMR (100 MHz,  $\text{CDCl}_3$ )  $\delta$  160.20, 158.44, 148.51, 129.71, 129.17, 117.30, 115.13, 103.86, 98.62, 55.40, 55.37, 43.17 ppm.

29.

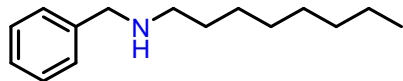

157 mg; 71% yield;  $^1\text{H}$  NMR (500 MHz,  $\text{CDCl}_3$ )  $\delta$  7.49 – 7.20 (m, 5H), 3.82 (s, 2H), 2.67 (t,  $J = 7.3$  Hz, 2H), 1.76 (s, 2H), 1.64 – 1.49 (m, 2H), 1.34 (m, 10H), 0.95 (t,  $J = 6.8$  Hz, 3H) ppm.  $^{13}\text{C}$  NMR (125 MHz,  $\text{CDCl}_3$ )  $\delta$  140.53, 128.37, 128.14, 126.87, 54.12, 49.55, 31.98, 30.15, 29.70, 29.41, 27.44, 22.75, 14.17 ppm.

30.

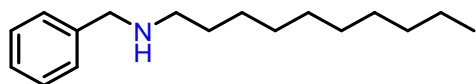

191 mg; 76% yield;  $^1\text{H}$  NMR (500 MHz,  $\text{CDCl}_3$ )  $\delta$  7.36 – 7.27 (m, 5H), 3.82 (s, 2H), 2.66 (t,  $J = 7.4$  Hz, 2H), 1.75 (s, 2H), 1.57 – 1.45 (m, 2H), 1.32 (m, 14H), 0.94 (q,  $J = 6.8$  Hz, 3H) ppm.  $^{13}\text{C}$  NMR (125 MHz,  $\text{CDCl}_3$ )  $\delta$  140.52, 128.36, 128.13, 126.86, 54.12, 49.55, 31.98, 30.15, 29.70, 29.66, 29.41, 29.41, 27.44, 22.75, 14.17 ppm.

31.

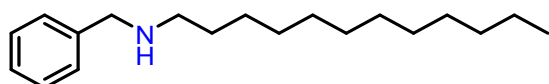

223 mg; 80% yield;  $^1\text{H}$  NMR (500 MHz,  $\text{CDCl}_3$ )  $\delta$  7.35 – 7.27 (m, 5H), 3.81 (s, 2H), 2.63 (t,  $J = 7.9$  Hz, 2H), 1.54 (s, 2H), 1.55 – 1.50 (m, 2H), 1.29 (m, 18H), 0.91 (q,  $J = 6.2$  Hz, 3H) ppm.  $^{13}\text{C}$  NMR (125 MHz,  $\text{CDCl}_3$ )  $\delta$  140.50, 128.39, 128.15, 126.89, 54.11, 49.54, 31.95, 30.28, 30.11, 29.70, 29.67, 29.64, 29.60, 29.38, 27.72, 22.72, 14.17 ppm.



32.

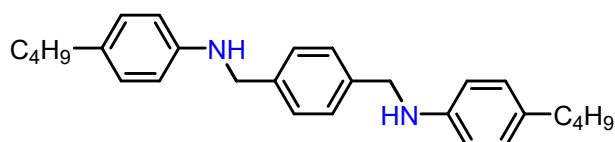

393 mg; 98% yield;  $^1\text{H}$  NMR (400 MHz,  $\text{CDCl}_3$ )  $\delta$  7.39(s, 4H), 7.00 (d,  $J = 8.55$  Hz, 4H), 6.59 (d,  $J = 8.65$  Hz, 2H), 4.31 (s, 4H), 3.92 (s, 2H), 2.52 (t,  $J = 7.75$  Hz, 4H), 1.60-1.52 (m, 4H), 1.39-1.33(m, 4H), 0.93 (t,  $J = 7.47$ , 6H) ppm.  $^{13}\text{C}$  NMR (100 MHz,  $\text{CDCl}_3$ )  $\delta$  146.08, 138.64, 132.09, 129.15, 127.83, 112.89, 84.39, 34.73, 34.03 ppm.

33.

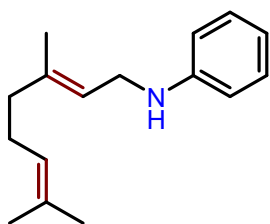

194 mg; 85% yield;  $^1\text{H}$  NMR (400 MHz,  $\text{CDCl}_3$ )  $\delta$  7.22(t,  $J = 7.39$  Hz, 2H), 6.76 (d,  $J = 7.36$  Hz, 2H), 6.73 (t,  $J = 7.41$  Hz, 2H), 5.25 (t,  $J = 6.13$  Hz, 1H), 5.21 (t,  $J = 6.41$  Hz, 1H), 3.81(d,  $J = 17.79$  Hz, 1H), 3.59(d,  $J = 17.05$  Hz, 1H), 2.18 (q,  $J = 7.82$  Hz, 2H), 2.07-1.80 (m, 2H), 1.78 (s, 3H), 1.73 (s, 3H), 1.62 (s, 3H) ppm.

34.

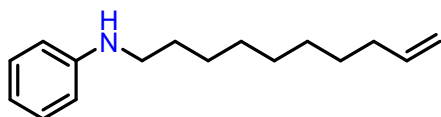

202 mg; 87 % yield;  $^1\text{H}$  NMR (400 MHz,  $\text{CDCl}_3$ )  $\delta$  7.20 (t,  $J = 7.31$  Hz, 2H), 6.71 (d,  $J = 7.33$  Hz, 1H), 6.62 (t,  $J = 7.48$  Hz, 2H), 5.85-5.81 (m, 1H), 5.00 (d,  $J = 17.12$  Hz, 2H), 4.95 (d,  $J = 9.91$  Hz, 2H), 3.13 (t,  $J = 7.09$  Hz, 1H), 2.18 (q,  $J = 7.82$  Hz, 2H), 2.07-1.80 (m, 2H), 1.78 (s, 3H), 1.73 (s, 3H), 1.62 (s, 3H) ppm.  $^{13}\text{C}$  NMR (100 MHz,  $\text{CDCl}_3$ )  $\delta$  148.54, 139.19, 129.22, 117.08, 114.17, 112.69, 44.00, 33.79, 29.59, 29.43, 29.40, 29.07, 28.91, 27.17 ppm.

35.

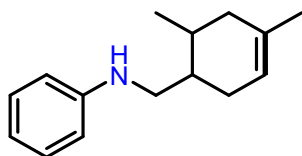

179 mg; 82% yield;  $^1\text{H}$  NMR (400 MHz,  $\text{CDCl}_3$ )  $\delta$  7.24-7.20 (m, 2H), 6.64-6.62 (m, 1H), 6.51-6.48 (m, 2H), 5.25 (t,  $J = 6.23$  Hz, 1H), 5.02 (s, 1H), 3.42 (dd,  $J = 10.02$  Hz,  $J = 10.13$  Hz, 1H), 3.15 (dd,  $J = 10.18$  Hz,  $J = 10.12$  Hz, 1H), 1.87-1.85(m, 2H), 1.70-1.57(m, 4H), 1.27 (s, 3H), 0.86 (q,  $J = 7.20$  Hz, 3H) ppm.  $^{13}\text{C}$  NMR (100 MHz,  $\text{CDCl}_3$ )  $\delta$  132.60, 128.97, 128.74, 127.79, 114.59, 110.88, 53.86, 47.74, 33.48, 29.71, 28.24, 22.94, 18.19 ppm.

## Refernces

1. *CrysAlisPRO*, Oxford Diffraction/Agilent Technol. UKLtd, Yarnton, Oxford, UK .
2. L. J. Farrugia, *J. Appl. Crystallogr.*, 2012, **45**, 849–854.
3. O. V. Dolomanov, L. J. Bourhis, R. J. Gildea, J. A. K. Howard and H. Puschmann, *J. Appl. Crystallogr.*, 2009, **42**, 339–341.
4. G. M. Sheldrick, *Acta Crystallogr., Sect. C: Struct. Chem.*, 2015, **71**, 3–8.
5. C. Kerner, S. D. Straub, Y. Sun and W. R. Thiel, *Eur. J. Org. Chem.*, 2016, **18**, 3060–3064.
6. M. Ruiz-Castañeda, M. C. Carrión, L. Santos, B. R. Manzano, G. Espino and F. A. Jalón, *ChemCatChem*, 2018, **10**, 5541–5550.
7. F. Christie, A. Zanotti-Gerosa and D. Grainger, *ChemCatChem*, 2018, **10**, 1012–1018.
8. N. Kayacı, S. Dayan, N. Özdemir, O. Dayan and N. Kalaycıoğlu Özpozan, *Appl. Organomet. Chem.*, 2018, **32**, e4558.
9. L. Kathuria and A. G. Samuelson, *Eur. J. Inorg. Chem.*, 2020, **24**, 2372–2379
10. X. J. Yun, C. Ling, W. Deng, Z. J. Liu and Z. J. Yao, *Organometallics*, 2020, **39**, 3830–3838.
11. A. R. Fatkulin, O. I. Afanasyev, A. A. Tsygankov and D. Chusov, *J. Catal.*, 2022, **405**, 404–409.

## NMR Spectra for secondary amines product

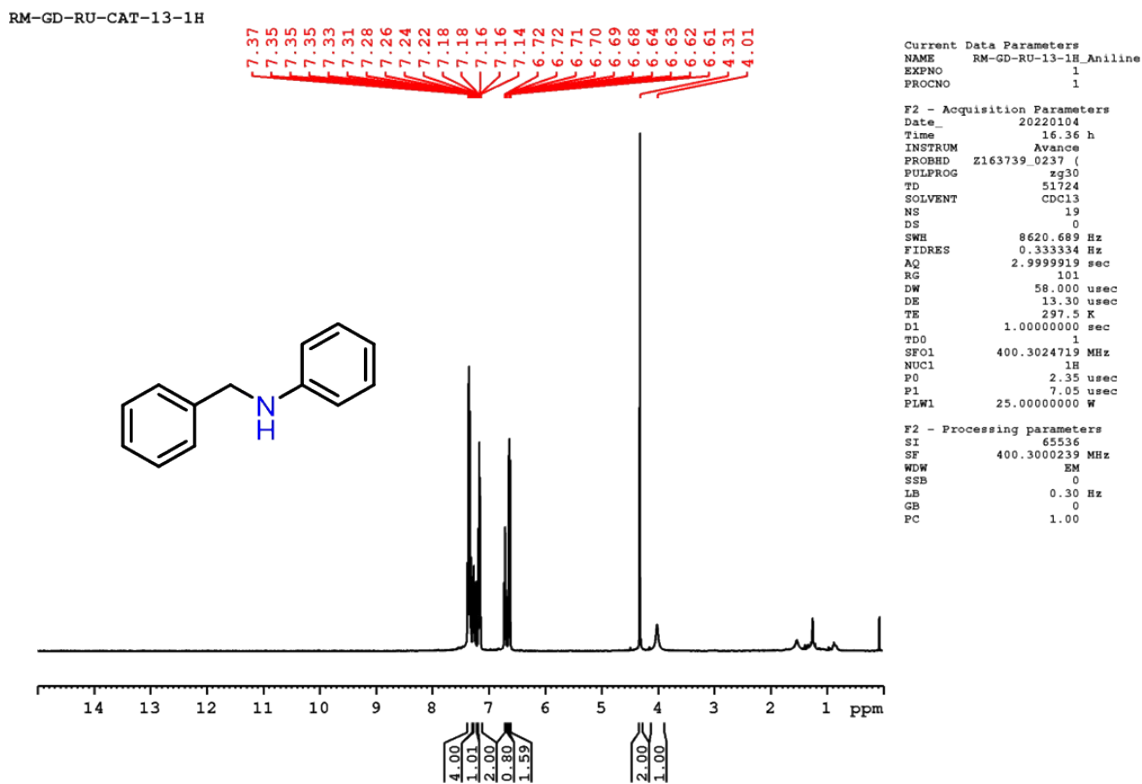

Figure S23.  $^1\text{H}$  NMR spectrum of complex 1a in  $\text{CDCl}_3$  (400 MHz).

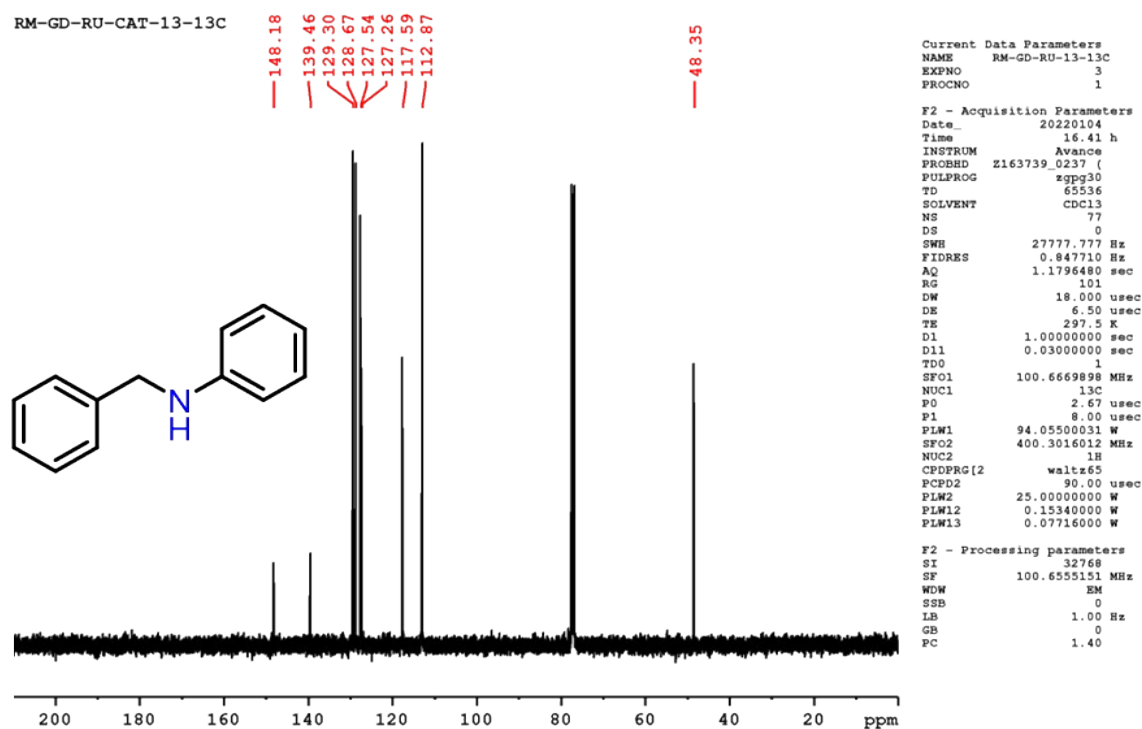

Figure S24.  $^{13}\text{C}$  NMR spectrum of complex 1a in  $\text{CDCl}_3$  (100 MHz).

RM-GD-RU-31A-1H

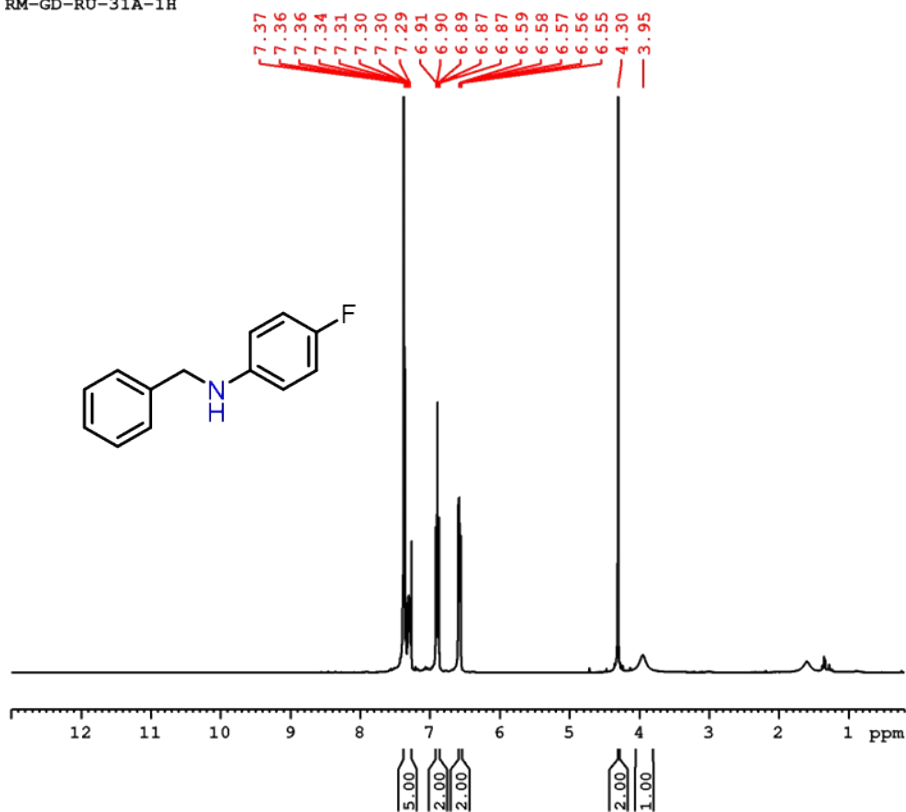

```

Current Data Parameters
NAME      RM-GD-RU-31A-1H
EXPNO    10
PROCNO   1

F2 - Acquisition Parameters
Date_    20220117
Time     15:31 h
INSTRUM  Avance Neo 400
PROBHD   Z163739_0226 (
PULPROG  zg30
TD       51724
SOLVENT  CDCl3
NS       15
DS       0
SWH      8620.689 Hz
FIDRES   0.333334 Hz
AQ       2.9999919 sec
RG       101
DW       58.000 usec
DE       13.14 usec
TE       295.7 K
D1       1.00000000 sec
TD0      1
SF01     400.1324708 MHz
NUC1     1H
P0       2.67 usec
P1       8.00 usec
PLW1     25.07999992 W

F2 - Processing parameters
SI       65536
SF       400.1300098 MHz
WDW      EM
SSB      0
LB       0.30 Hz
GB       0
PC       1.00
  
```

Figure S25. <sup>1</sup>H NMR spectrum of complex **1f** in CDCl<sub>3</sub> (400 MHz).

RM-GD-RU-37-13C

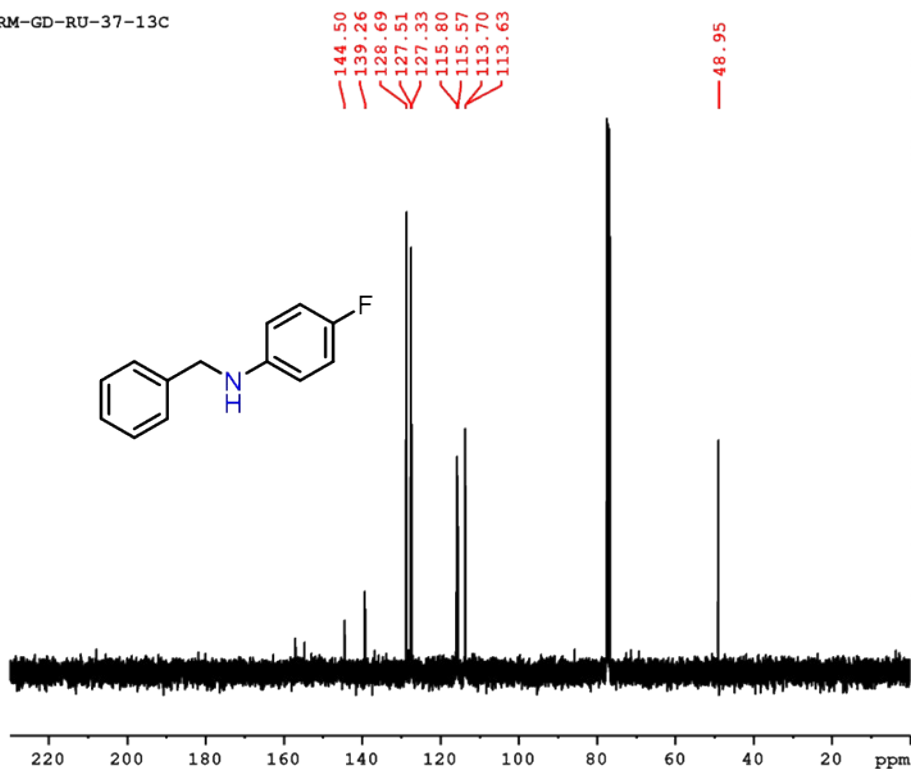

```

Current Data Parameters
NAME      RM-GD-RU-31-13C_p-F aniline
EXPNO    12
PROCNO   1

F2 - Acquisition Parameters
Date_    20220120
Time     9:10 h
INSTRUM  Avance Neo 400
PROBHD   Z163739_0226 (
PULPROG  sggp30
TD       65536
SOLVENT  CDCl3
NS       246
DS       2
SWH      27777.777 Hz
FIDRES   0.847710 Hz
AQ       1.1796480 sec
RG       101
DW       18.000 usec
DE       6.50 usec
TE       297.8 K
D1       1.00000000 sec
D11      0.03000000 sec
TD0      1
SF01     100.6242384 MHz
NUC1     13C
P0       2.67 usec
P1       8.00 usec
PLW1     99.33999634 W
SF02     400.1316005 MHz
NUC2     1H
CPDPRG2  waltz65
PCPD2    90.00 usec
PLW2     25.07999992 W
PLM12    0.19815999 W
PLM13    0.09967500 W

F2 - Processing parameters
SI       32768
SF       100.6127685 MHz
WDW      EM
SSB      0
LB       1.00 Hz
GB       0
PC       1.40
  
```

Figure S26. <sup>13</sup>C NMR spectrum of complex **1f** in CDCl<sub>3</sub> (100 MHz).

RM-GD-RU-25-1H

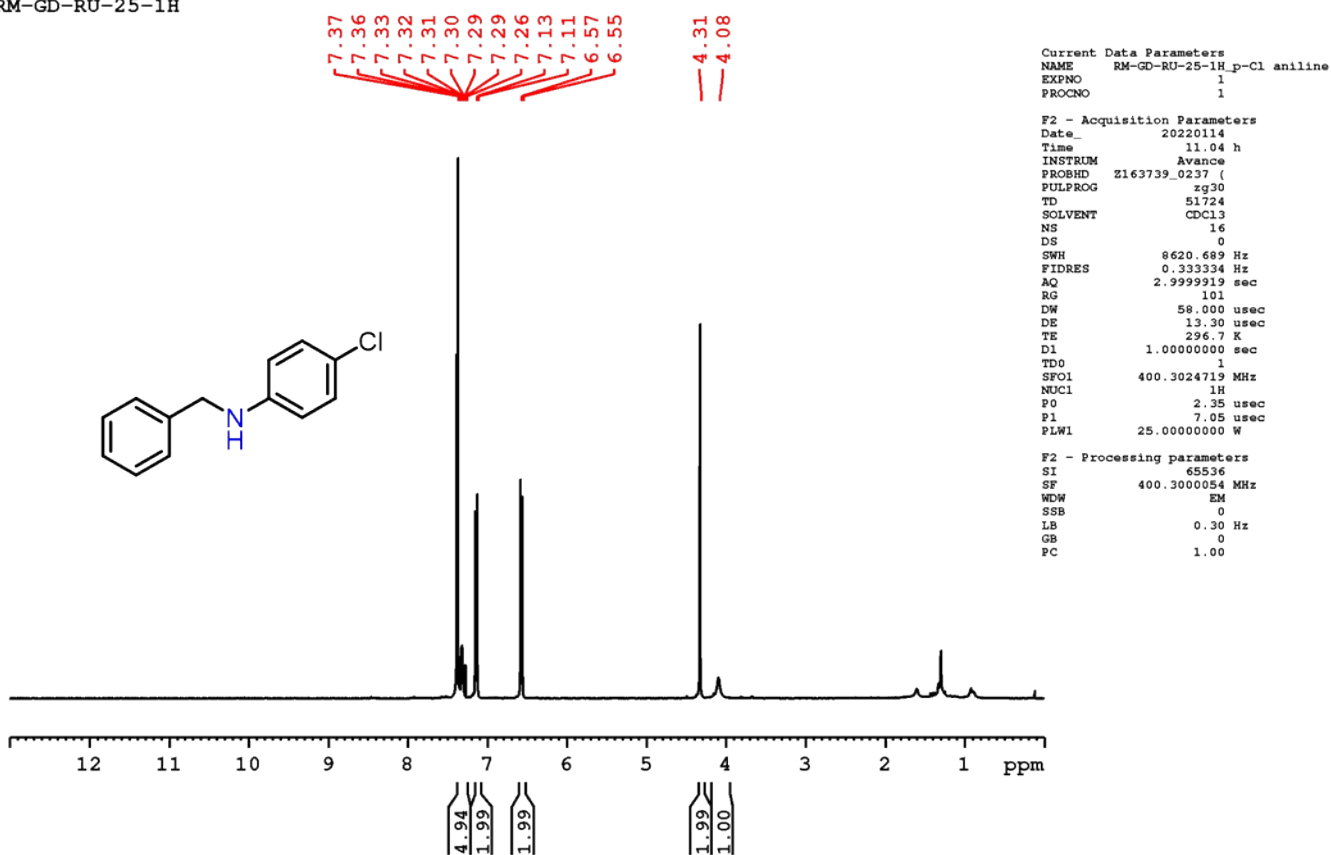

Figure S27. <sup>1</sup>H NMR spectrum of complex **1g** in CDCl<sub>3</sub> (400 MHz).

RM-GD-RU-25-13

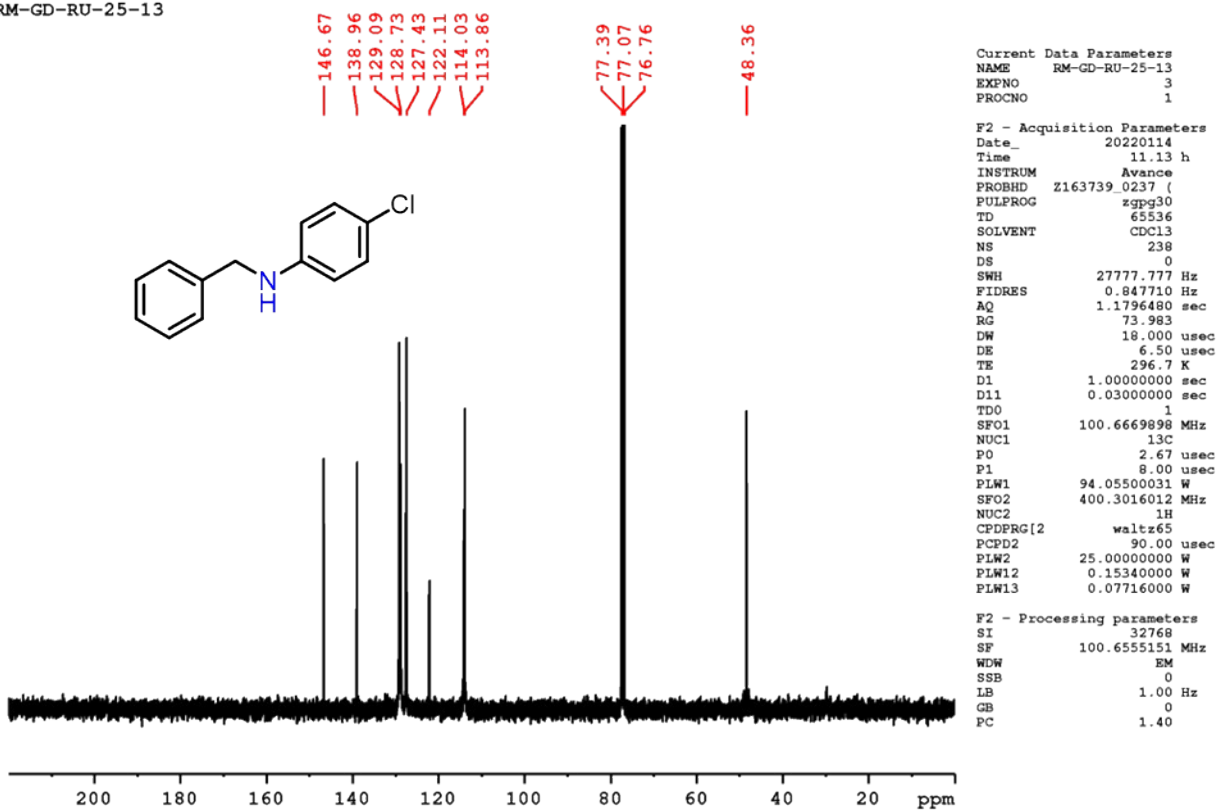

Figure S28. <sup>13</sup>C NMR spectrum of complex **1g** in CDCl<sub>3</sub> (100 MHz).

RM-GD-RU-21AA-1H

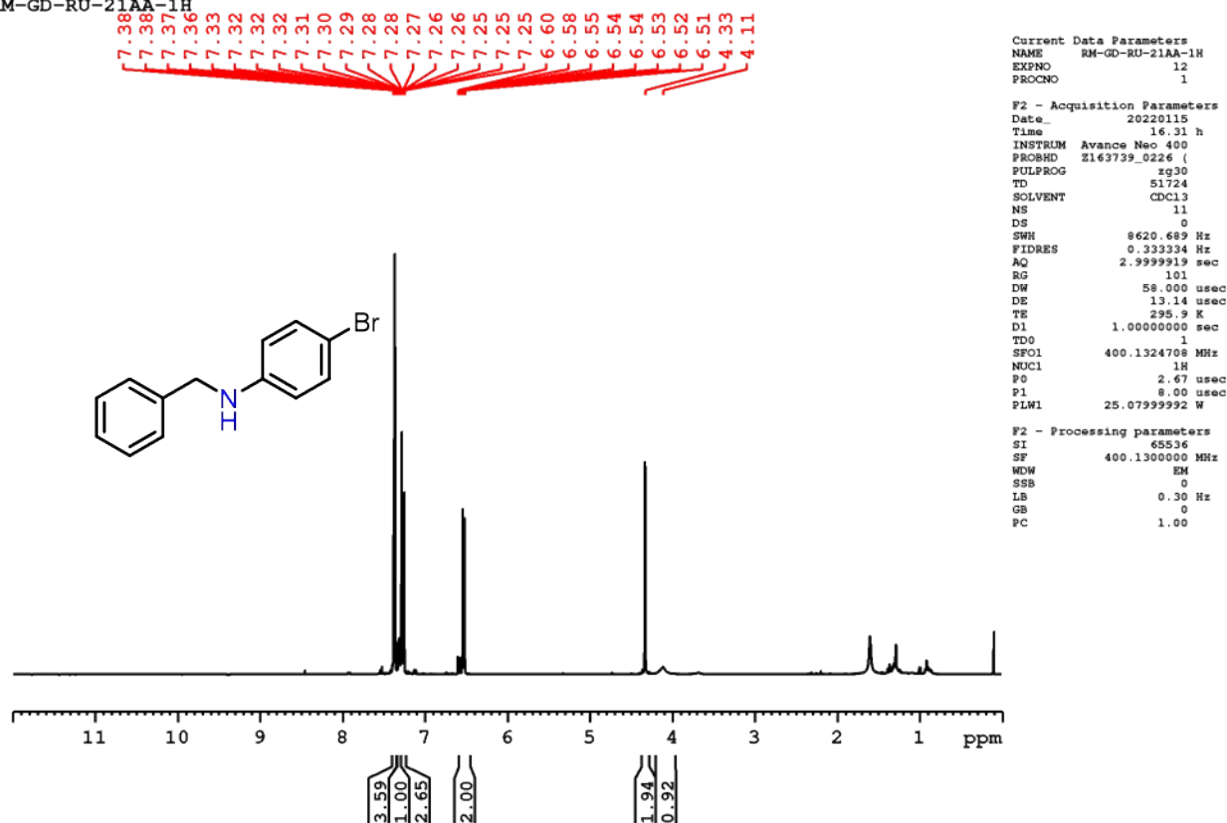

Figure S29. <sup>1</sup>H NMR spectrum of complex **1h** in CDCl<sub>3</sub> (400 MHz).

RM-GD-RU-21-13C

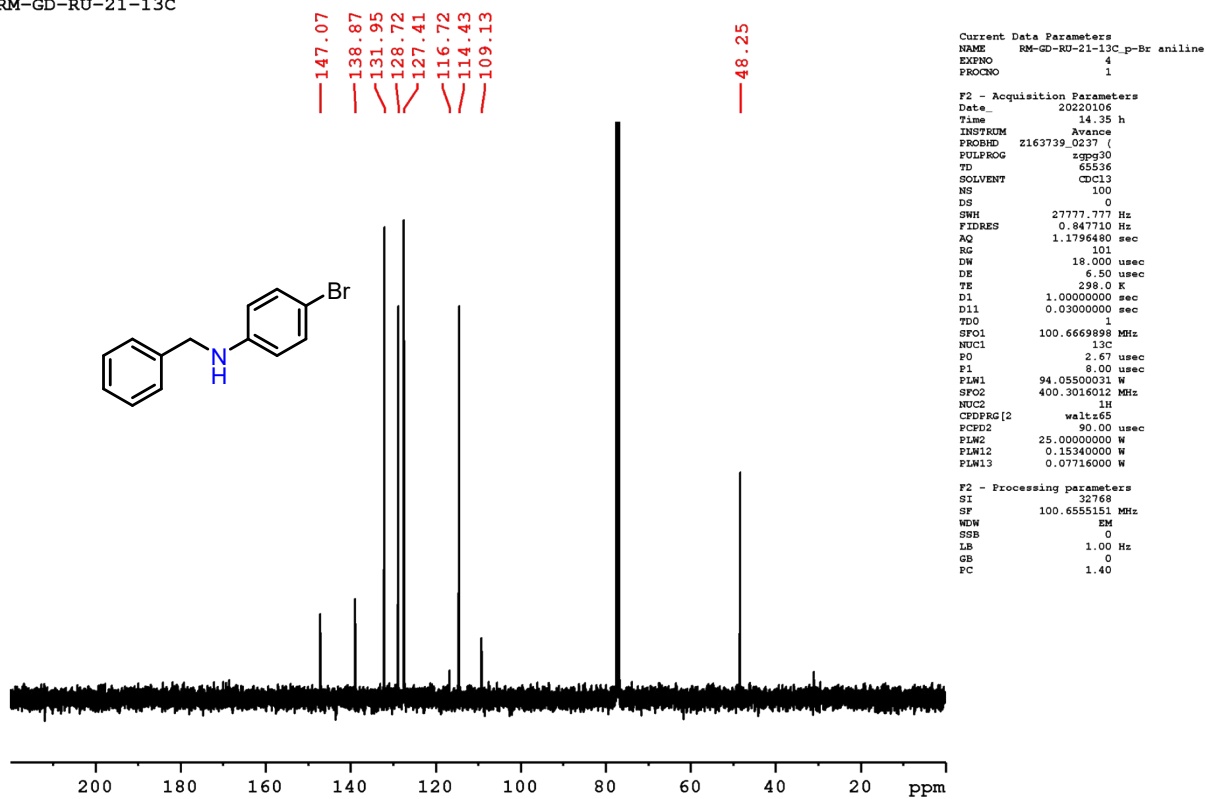

Figure S30. <sup>13</sup>C NMR spectrum of complex **1h** in CDCl<sub>3</sub> (100 MHz).

RM-GD-RU-18-1H

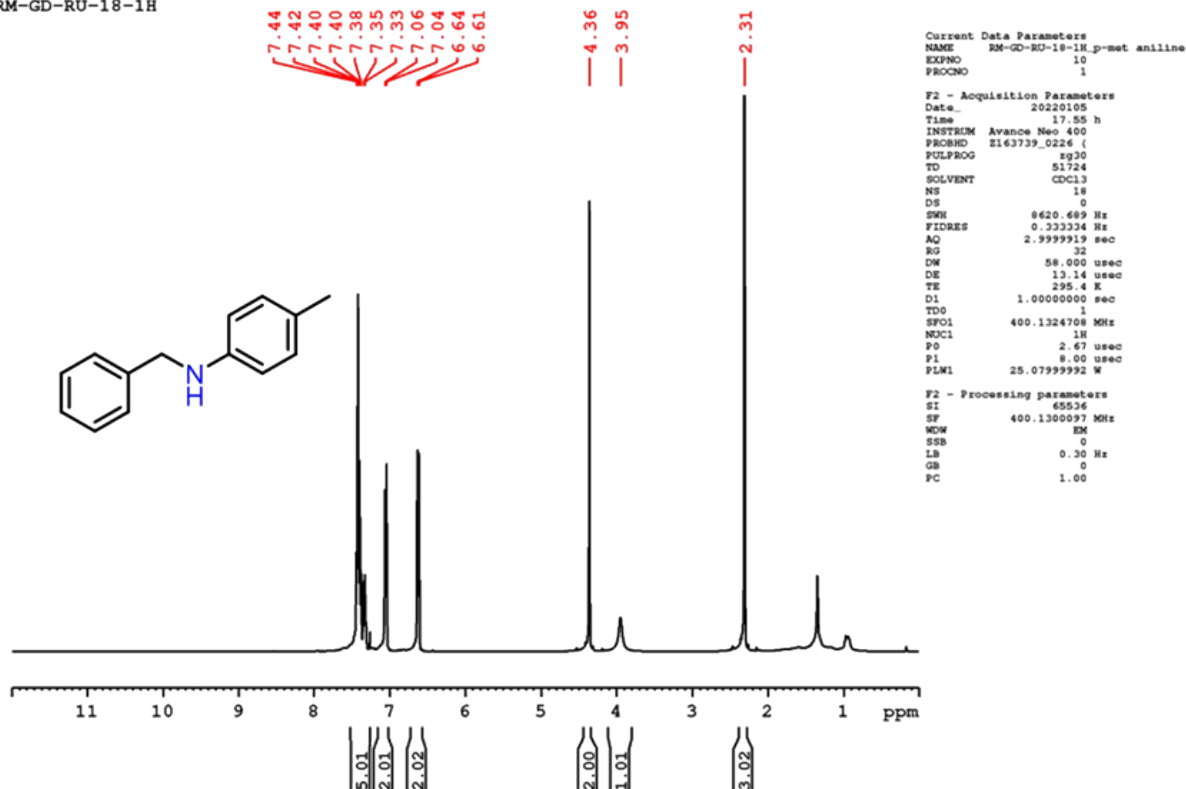

Figure S31. <sup>1</sup>H NMR spectrum of complex **1b** in CDCl<sub>3</sub> (400 MHz).

RM-GD-RU-18-13C

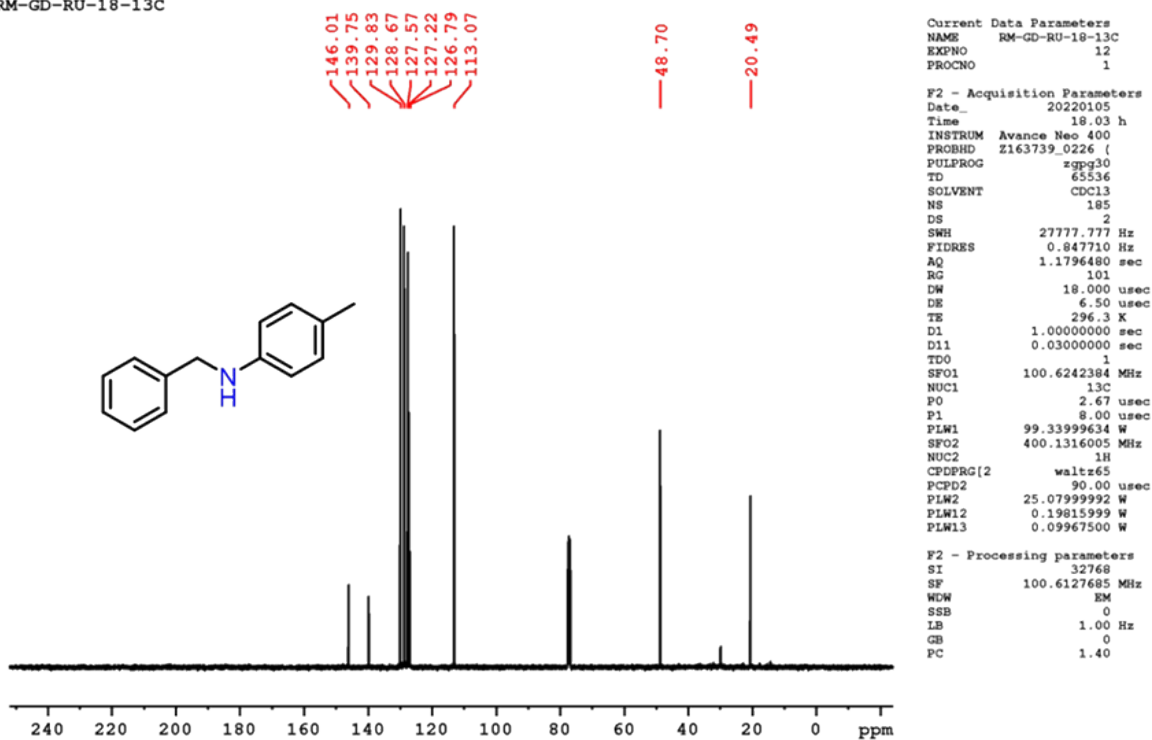

Figure S32. <sup>13</sup>C NMR spectrum of complex **1b** in CDCl<sub>3</sub> (100 MHz).

RM-GD-CAT-24A-1H

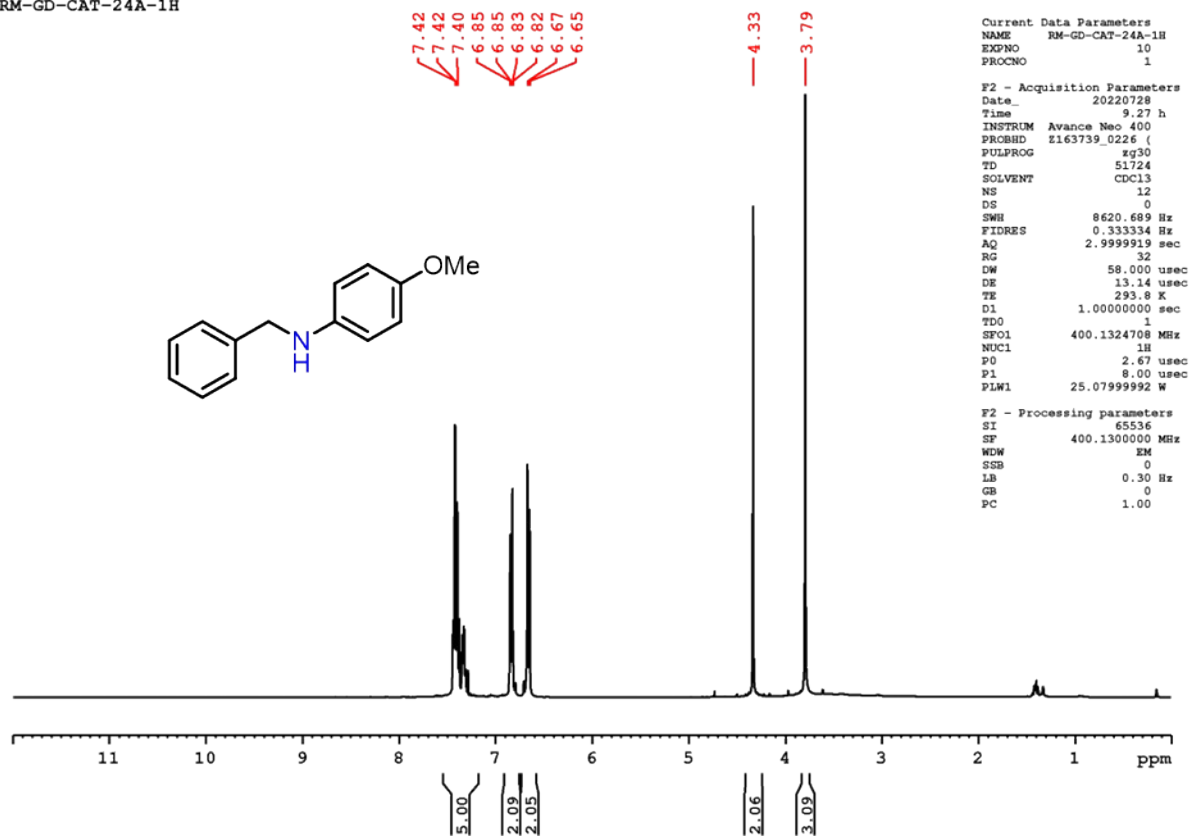

Figure S33. <sup>1</sup>H NMR spectrum of complex **1c** in CDCl<sub>3</sub> (400 MHz).

RM-GD-CAT-24A-13C

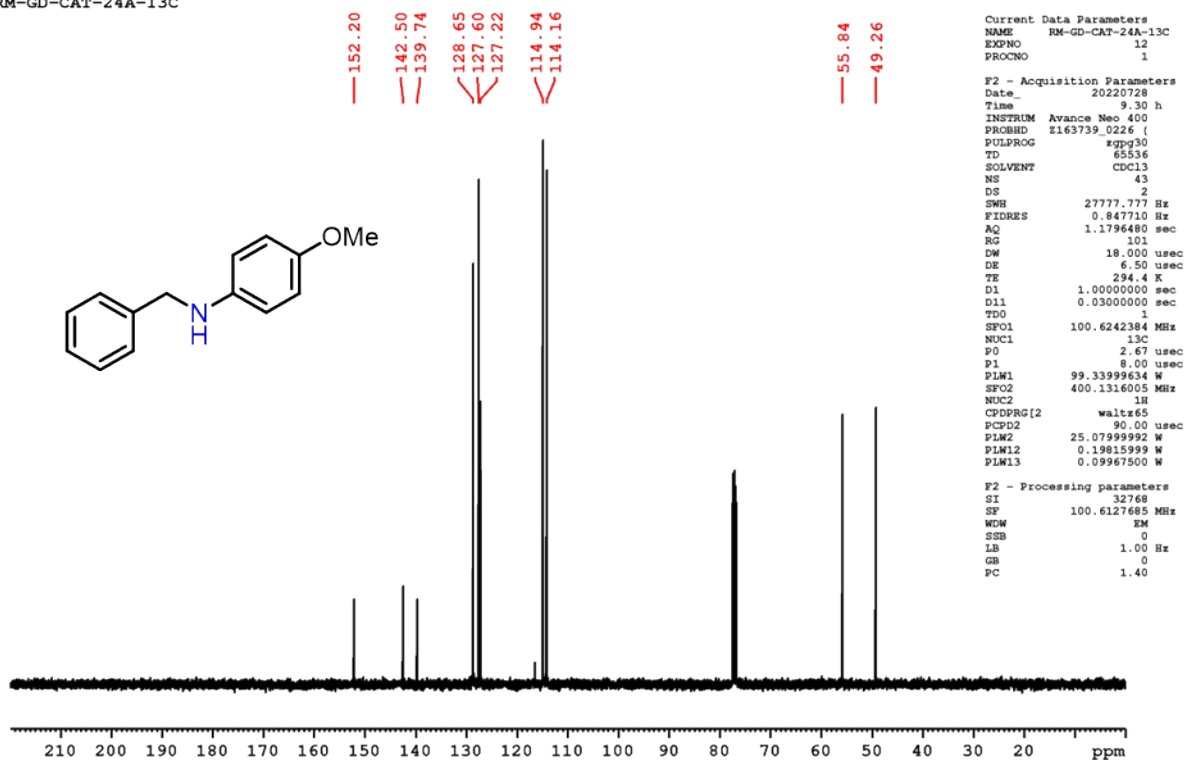

Figure S34. <sup>13</sup>C NMR spectrum of complex **1c** in CDCl<sub>3</sub> (100 MHz).



RM-GD-RU-45-1H

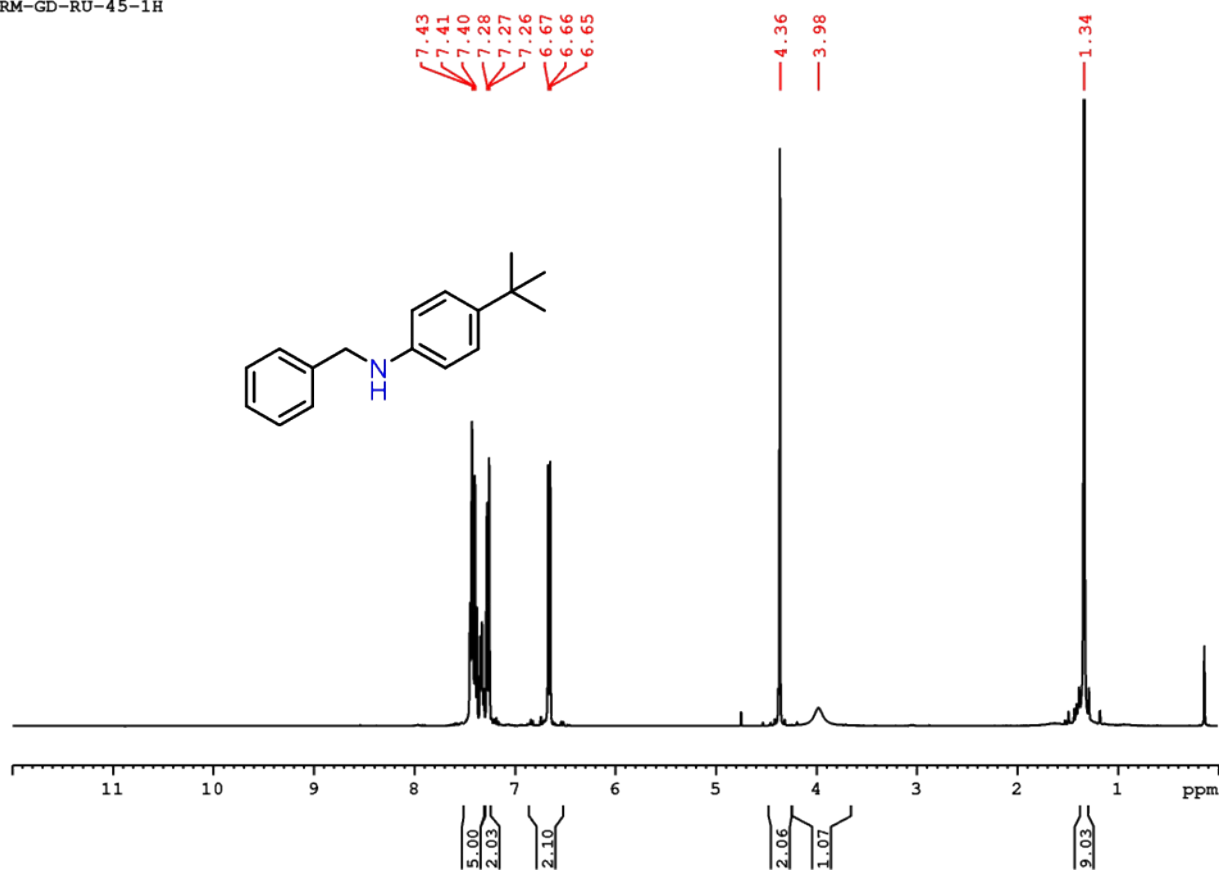

Figure S35. <sup>1</sup>H NMR spectrum of complex **1e** in CDCl<sub>3</sub> (400 MHz).

RM-GD-RU-45-13C

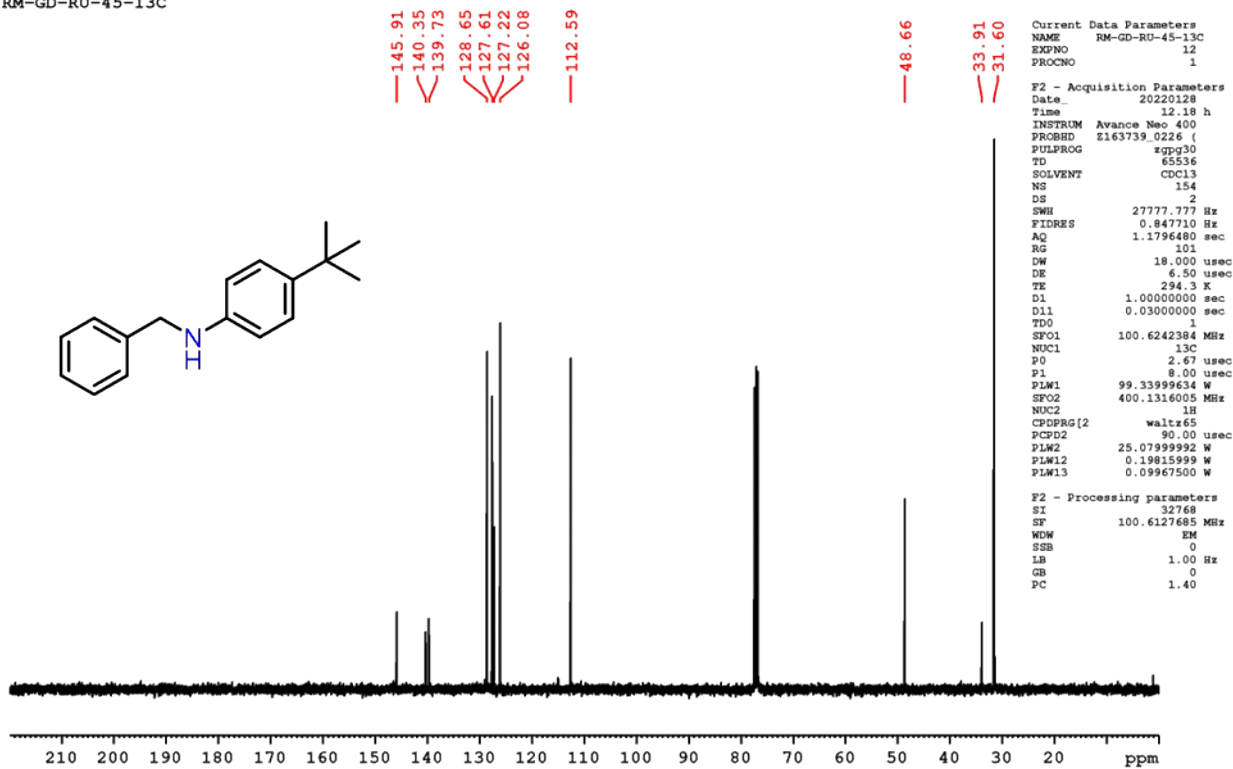

Figure S36. <sup>13</sup>C NMR spectrum of complex **1e** in CDCl<sub>3</sub> (100 MHz).

RM-GD-RU-44-A-1H

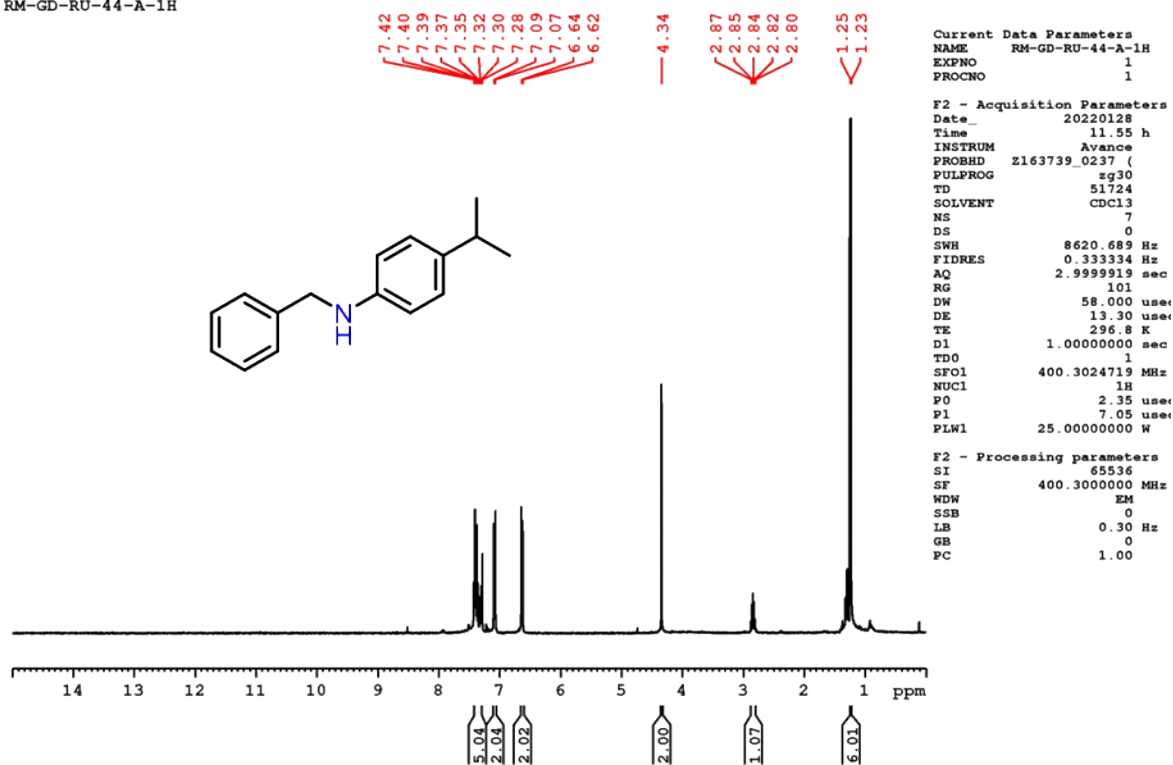

Figure S37. <sup>1</sup>H NMR spectrum of complex **1d** in CDCl<sub>3</sub> (400 MHz).

RM-GD-RU-44-A-13C

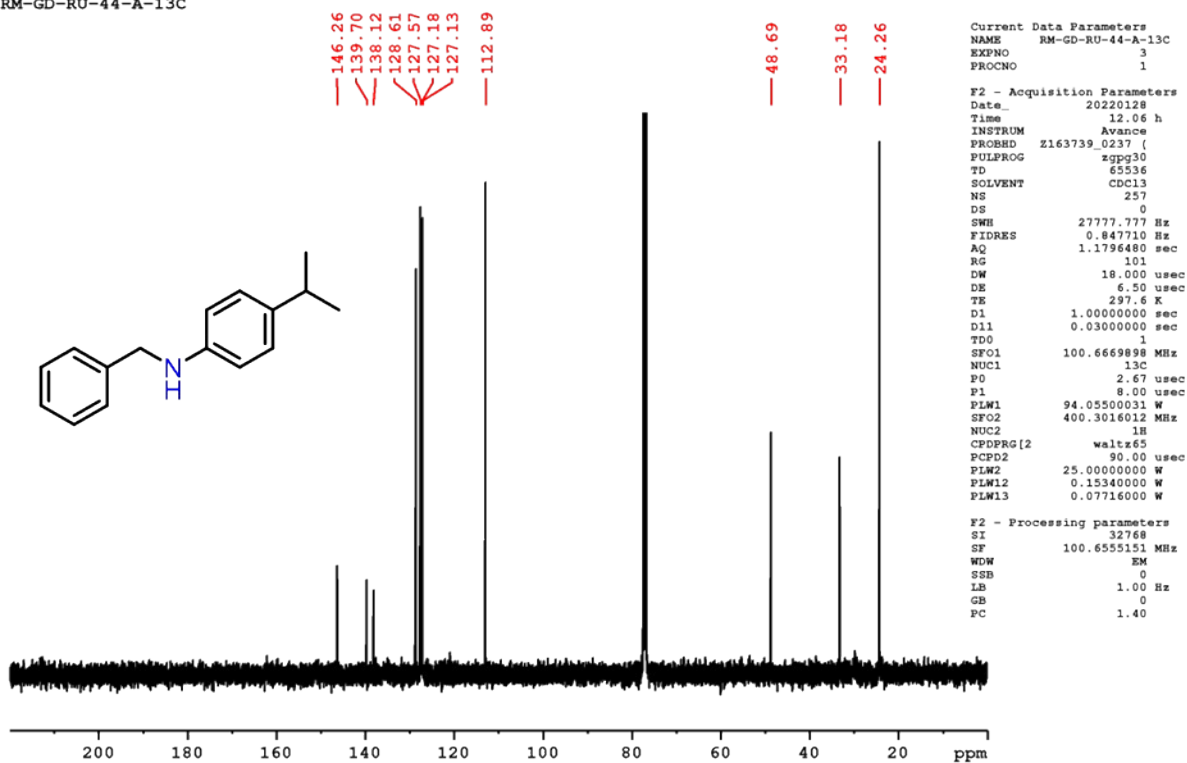

Figure S38. <sup>13</sup>C NMR spectrum of complex **1d** in CDCl<sub>3</sub> (100 MHz).

RM-GD-RU-48-1H

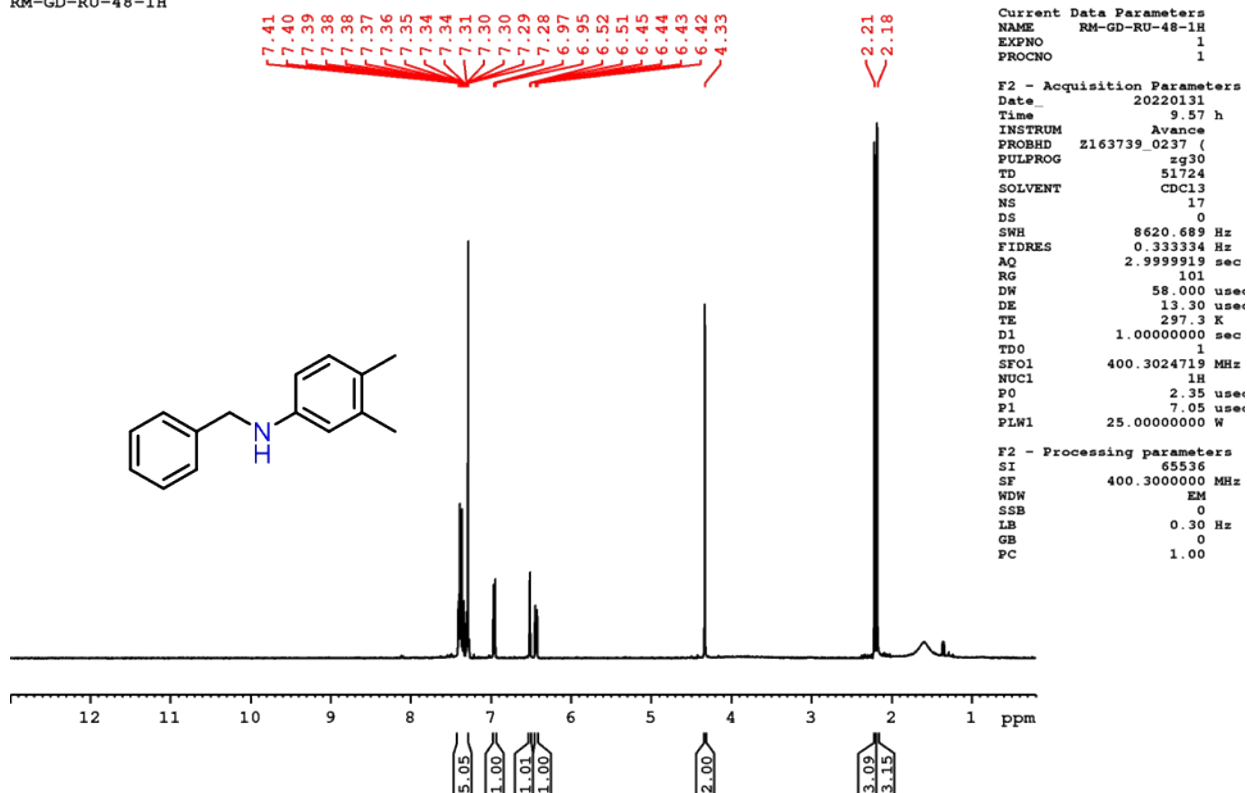

Figure S39. <sup>1</sup>H NMR spectrum of complex **1j** in CDCl<sub>3</sub> (400 MHz).

RM-GD-RU-48-13CC

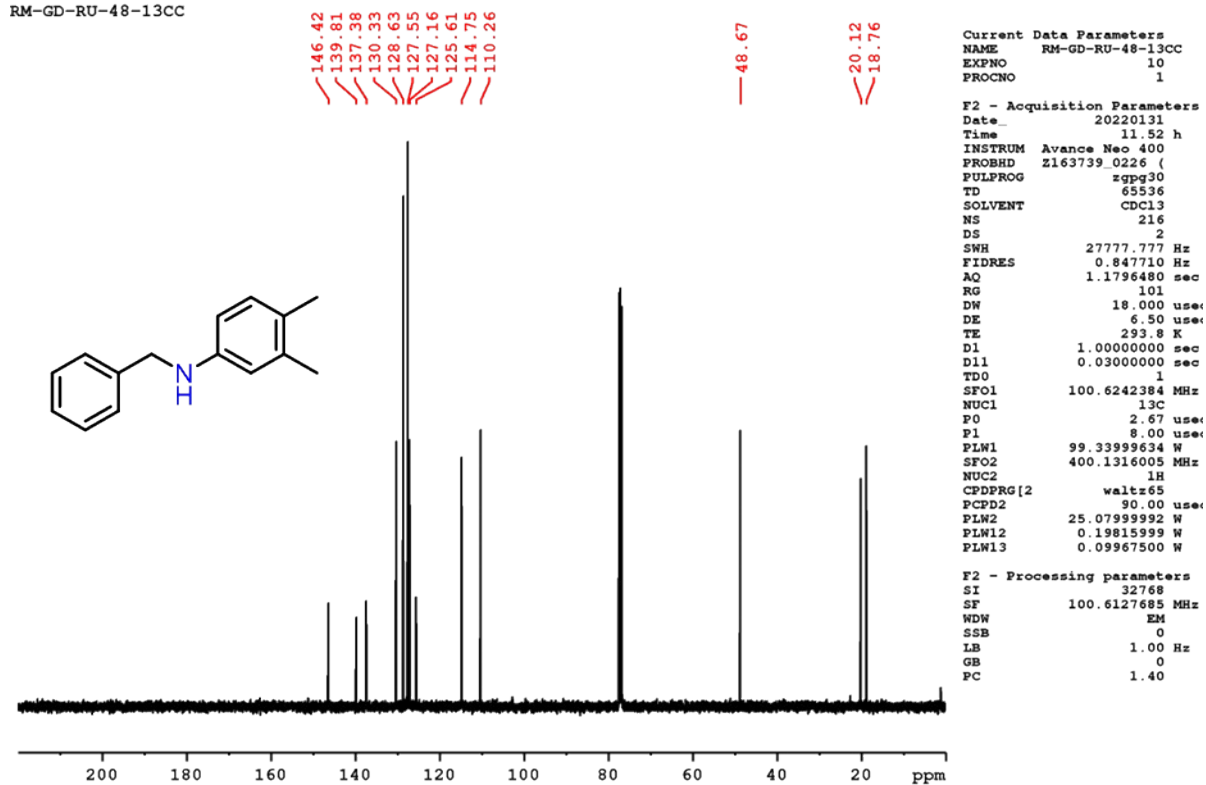

Figure S40. <sup>13</sup>C NMR spectrum of complex **1j** in CDCl<sub>3</sub> (100 MHz).

RM-GD-RU-39-1H

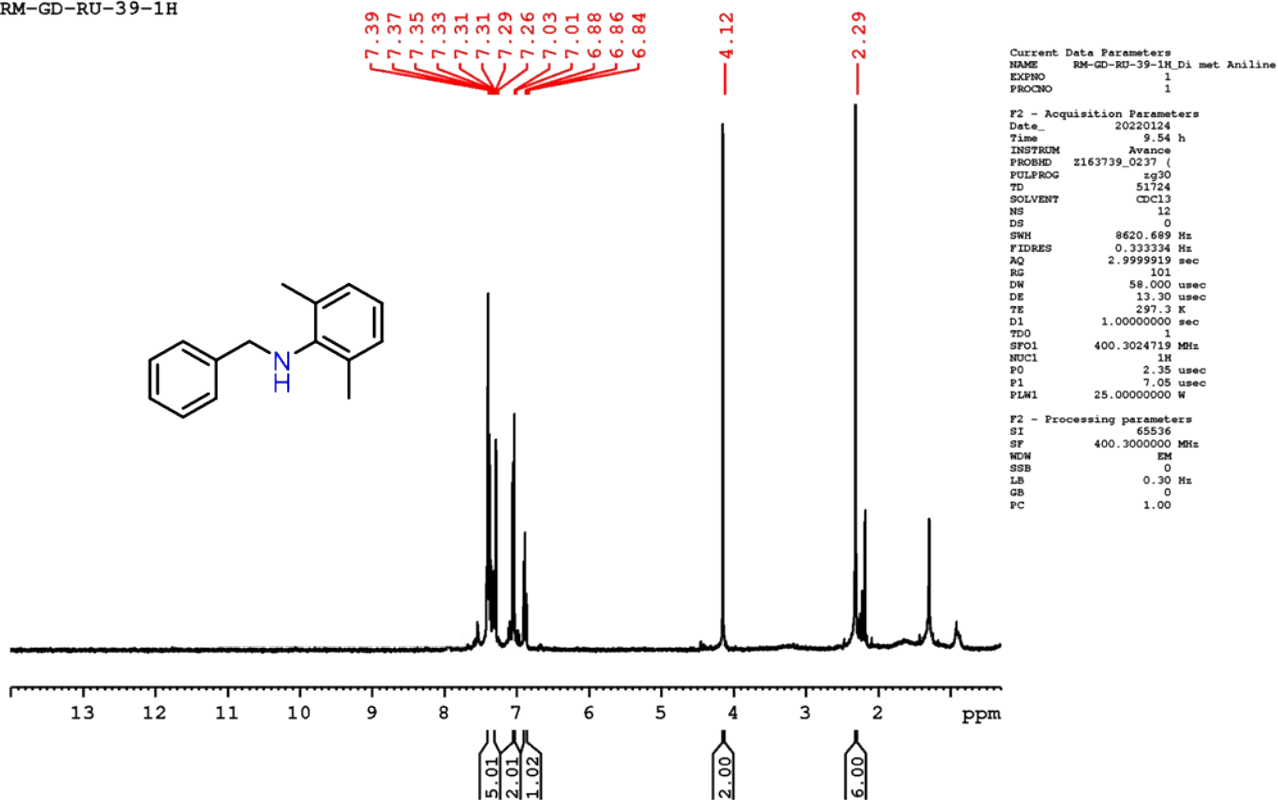

Figure S41. <sup>1</sup>H NMR spectrum of complex **1o** in CDCl<sub>3</sub> (400 MHz).

RM-GD-RU-39-2-13C

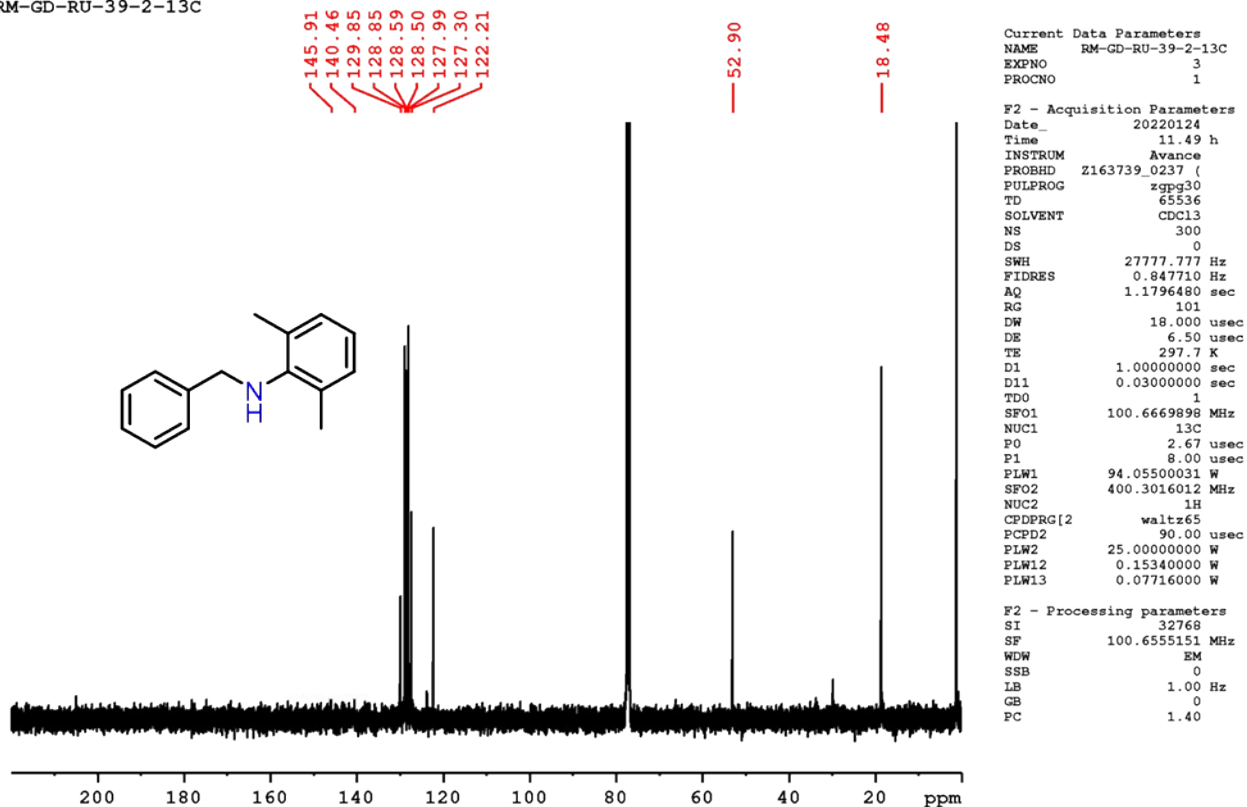

Figure S42. <sup>13</sup>C NMR spectrum of complex **1o** in CDCl<sub>3</sub> (100 MHz).

RM-GD-RU-53D-1H

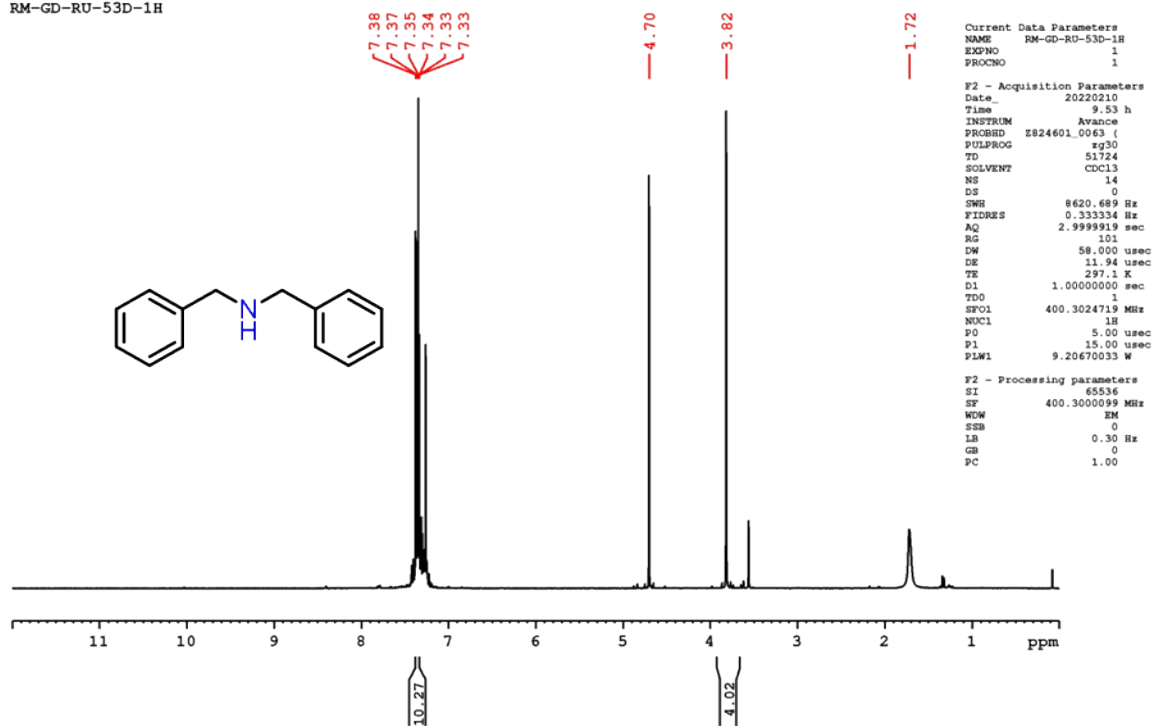

Figure S43. <sup>1</sup>H NMR spectrum of complex **1k** in CDCl<sub>3</sub> (400 MHz).

RM-GD-RU-53D-13C

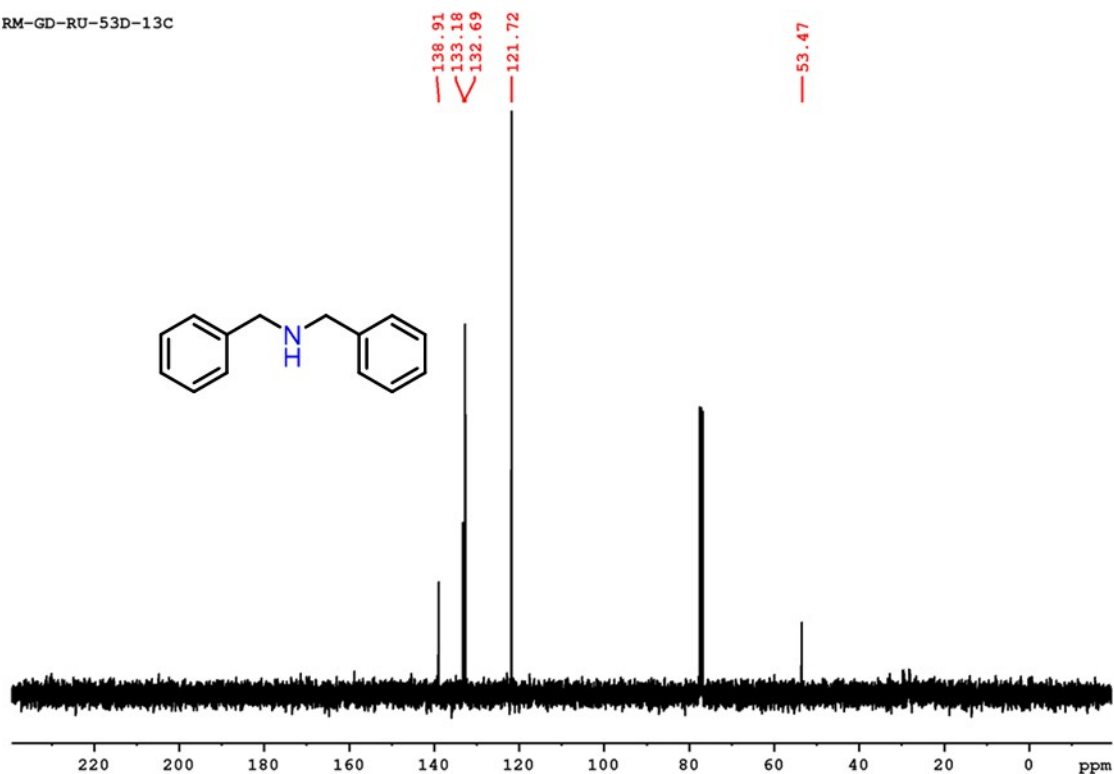

Figure S44. <sup>13</sup>C NMR spectrum of complex **1k** in CDCl<sub>3</sub> (100 MHz).

RM-GD-RU-84B-1H

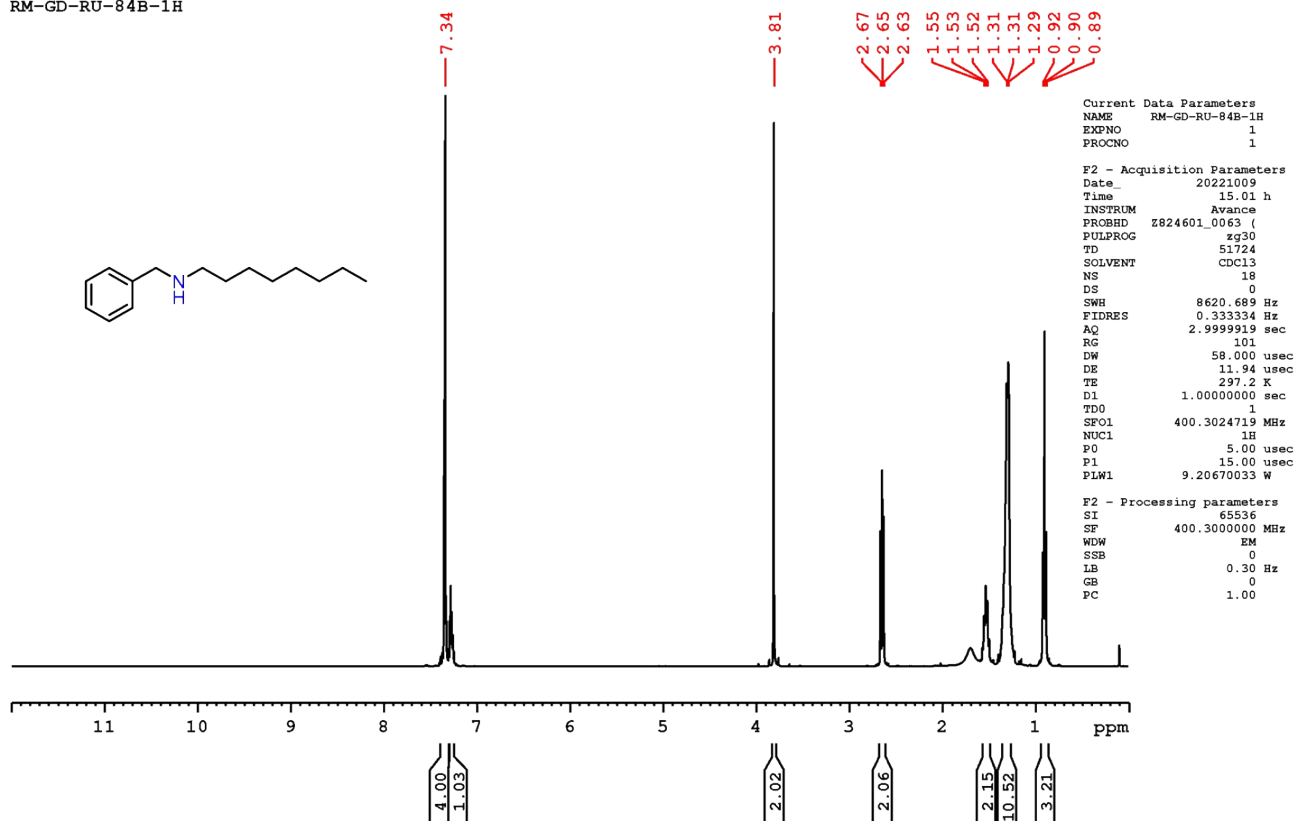

Figure S45. <sup>1</sup>H NMR spectrum of complex **11** in CDCl<sub>3</sub> (400 MHz).

RM-GD-RU-84B-13C

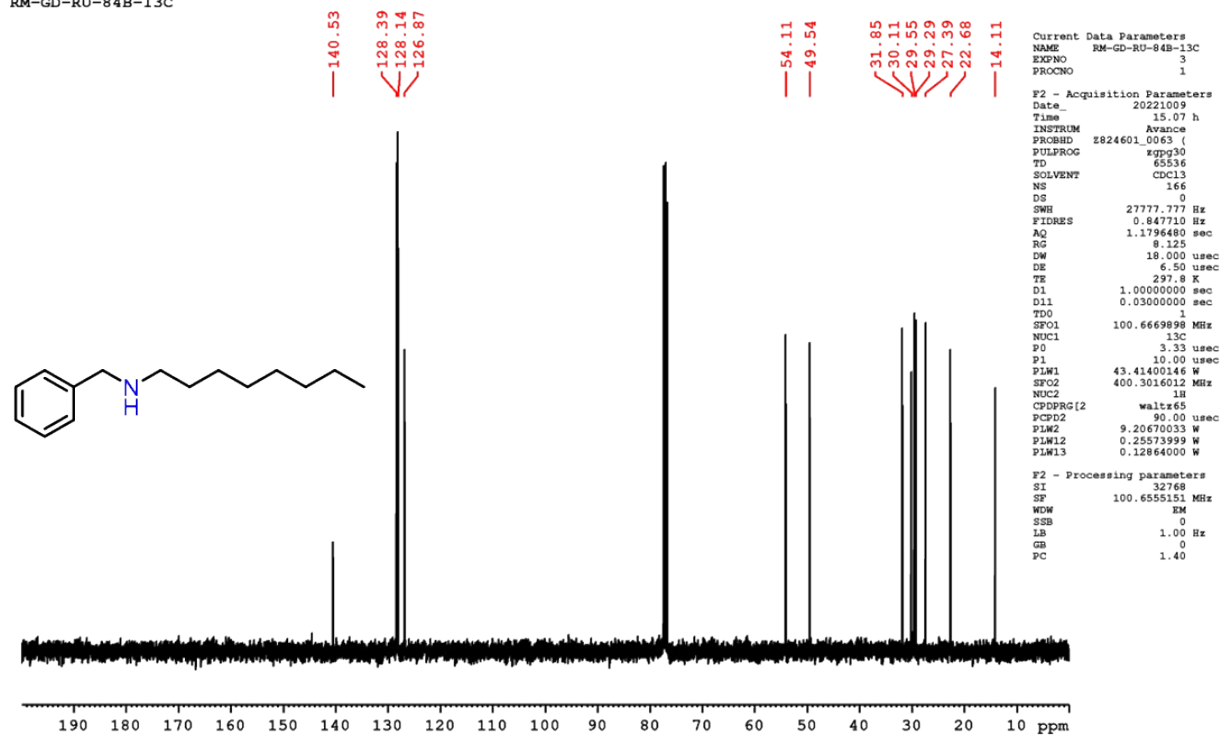

Figure S46. <sup>13</sup>C NMR spectrum of complex **11** in CDCl<sub>3</sub> (100 MHz).

RM-GD-RU-80B-1H

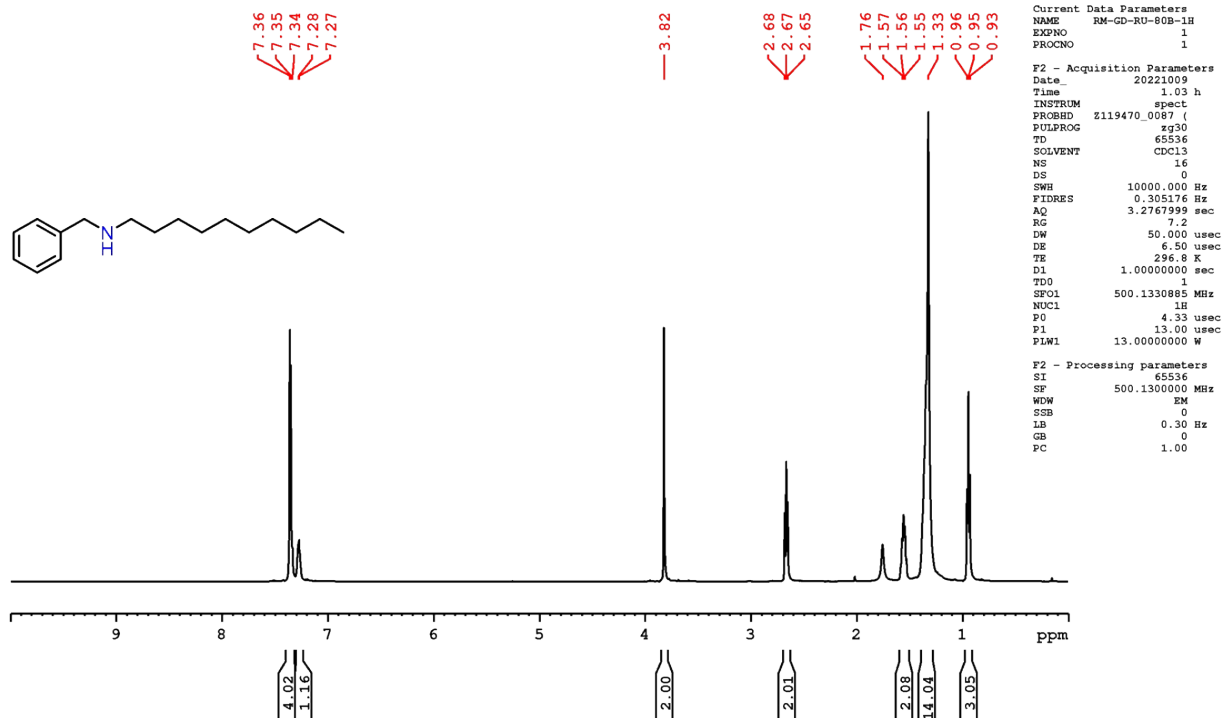

Figure S47. <sup>1</sup>H NMR spectrum of complex **1m** in CDCl<sub>3</sub> (400 MHz).

RM-GD-RU-80B-13C

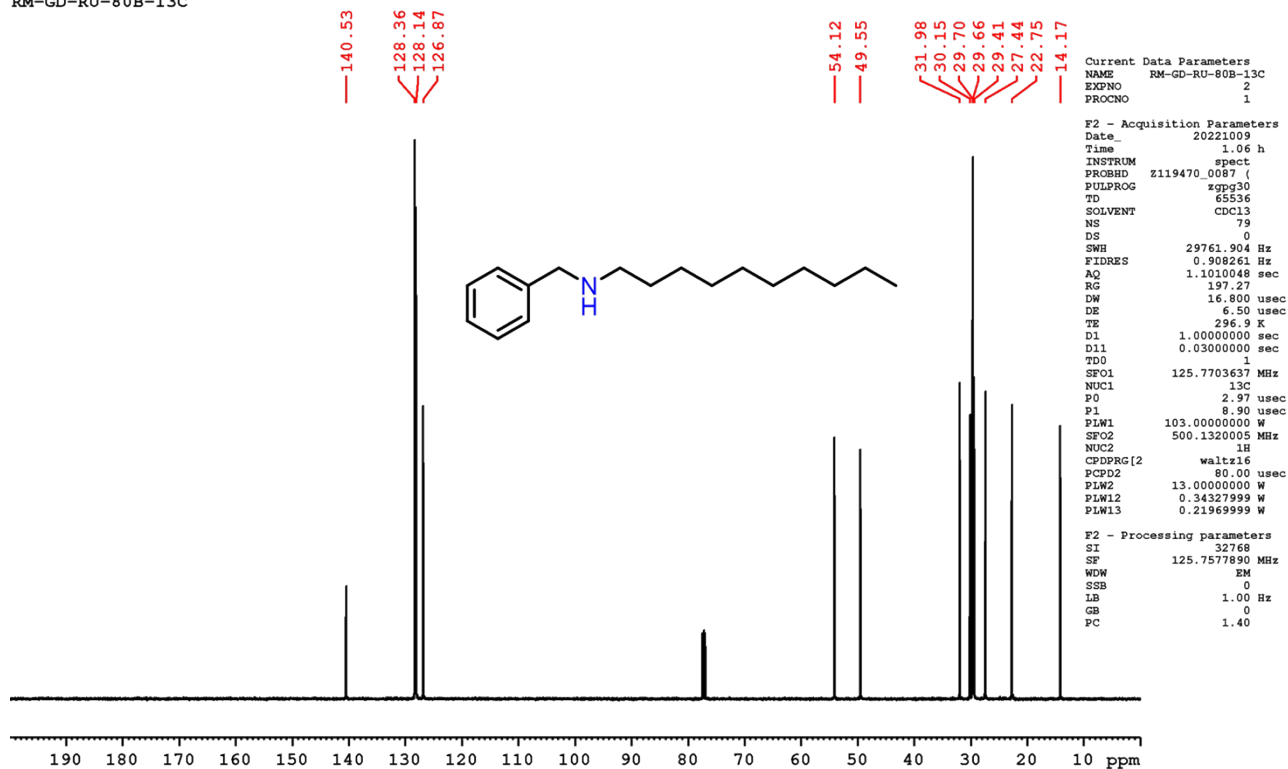

Figure S48. <sup>13</sup>C NMR spectrum of complex **1m** in CDCl<sub>3</sub> (100 MHz).

RM-GD-RU-85B-1H

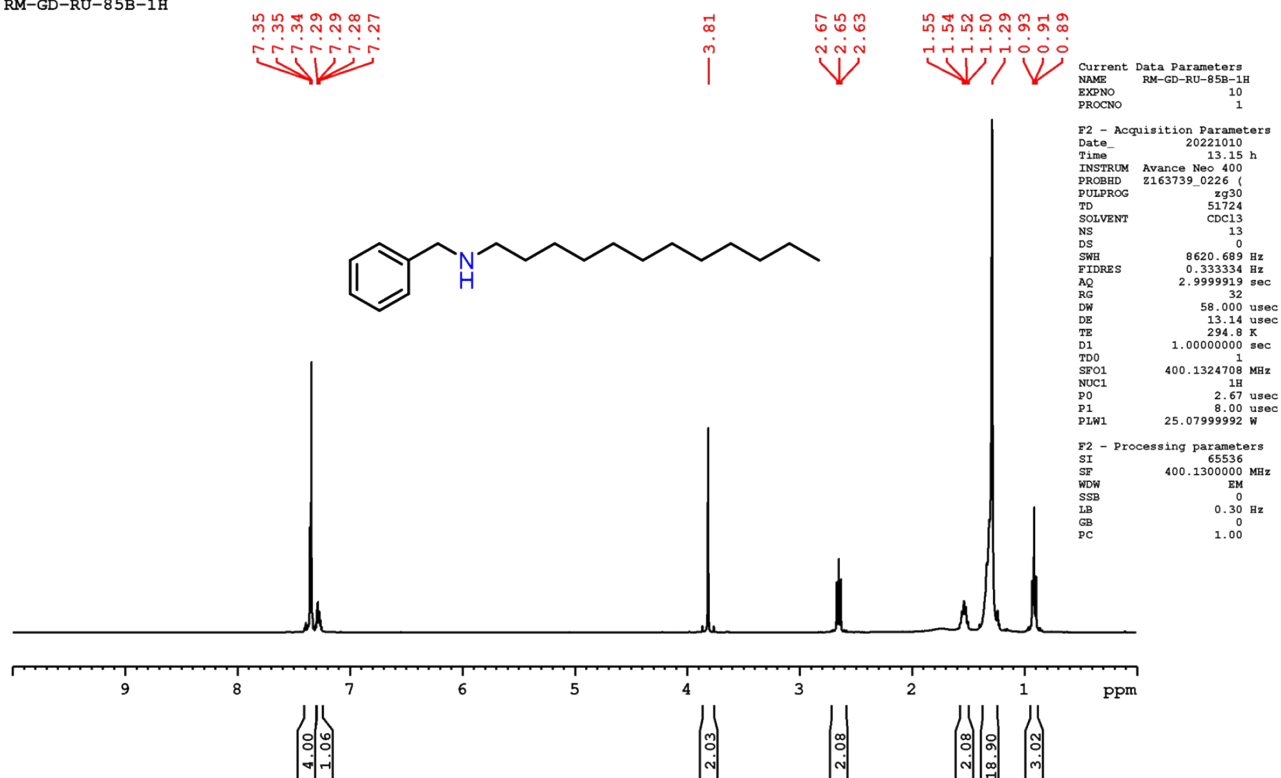

Figure S49. <sup>1</sup>H NMR spectrum of complex **1n** in CDCl<sub>3</sub> (400 MHz).

RM-GD-RU-85BA-13C

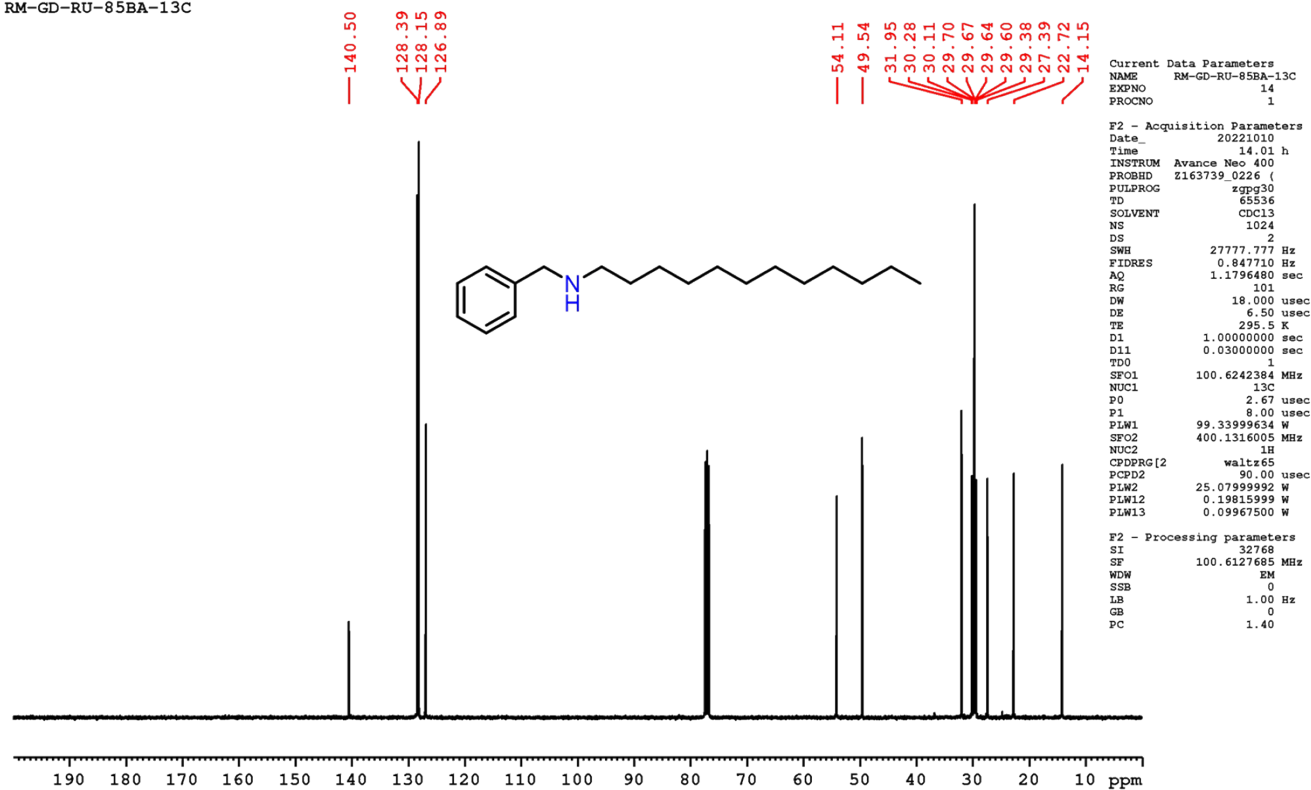

Figure S50. <sup>13</sup>C NMR spectrum of complex **1n** in CDCl<sub>3</sub> (100 MHz).



RM-GD-RU-58A-1H

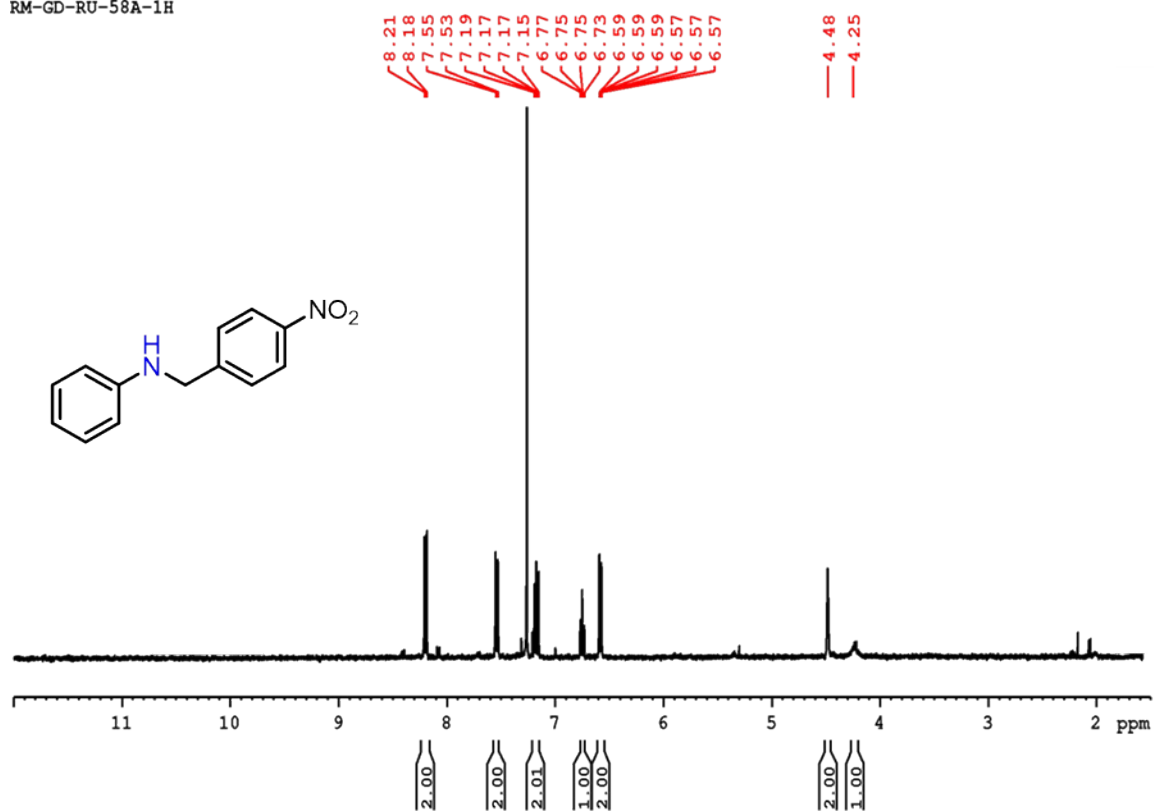

Figure S51. <sup>1</sup>H NMR spectrum of complex **2b** in CDCl<sub>3</sub> (400 MHz).

RM-GD-RU-58-C-13C

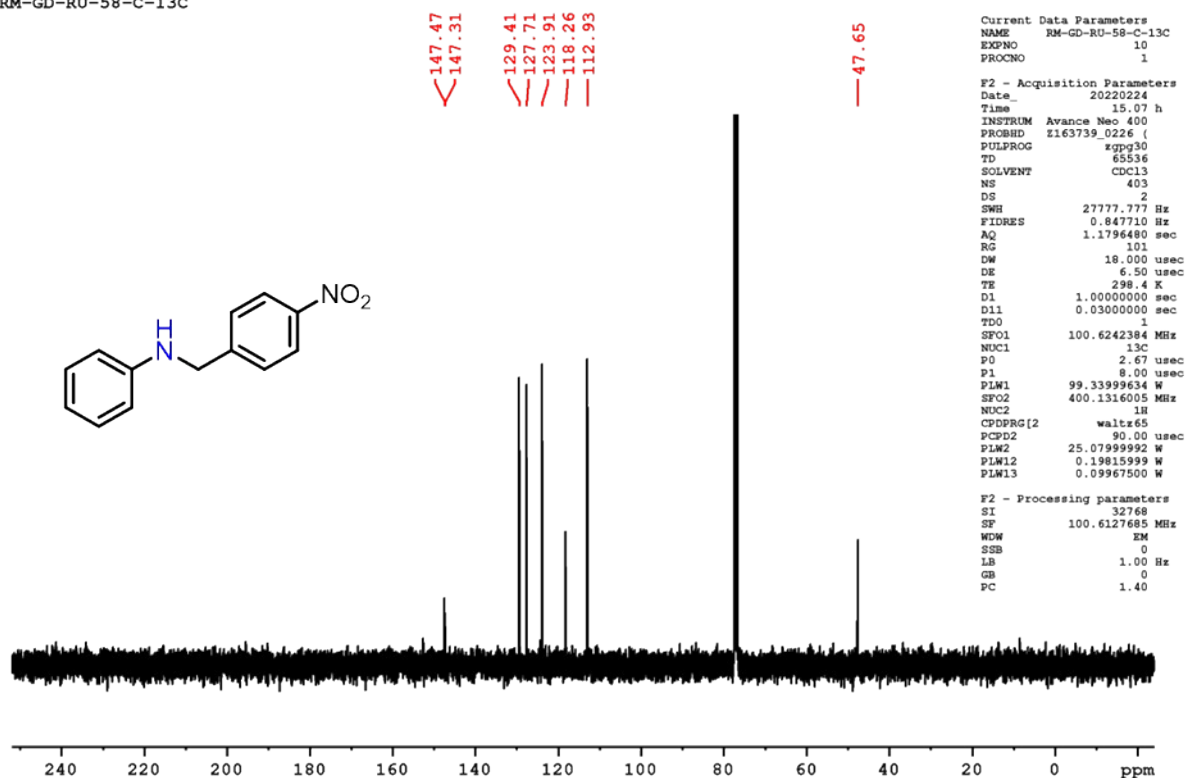

Figure S52. <sup>13</sup>C NMR spectrum of complex **2b** in CDCl<sub>3</sub> (100 MHz).

RM-GD-RU-29-1H

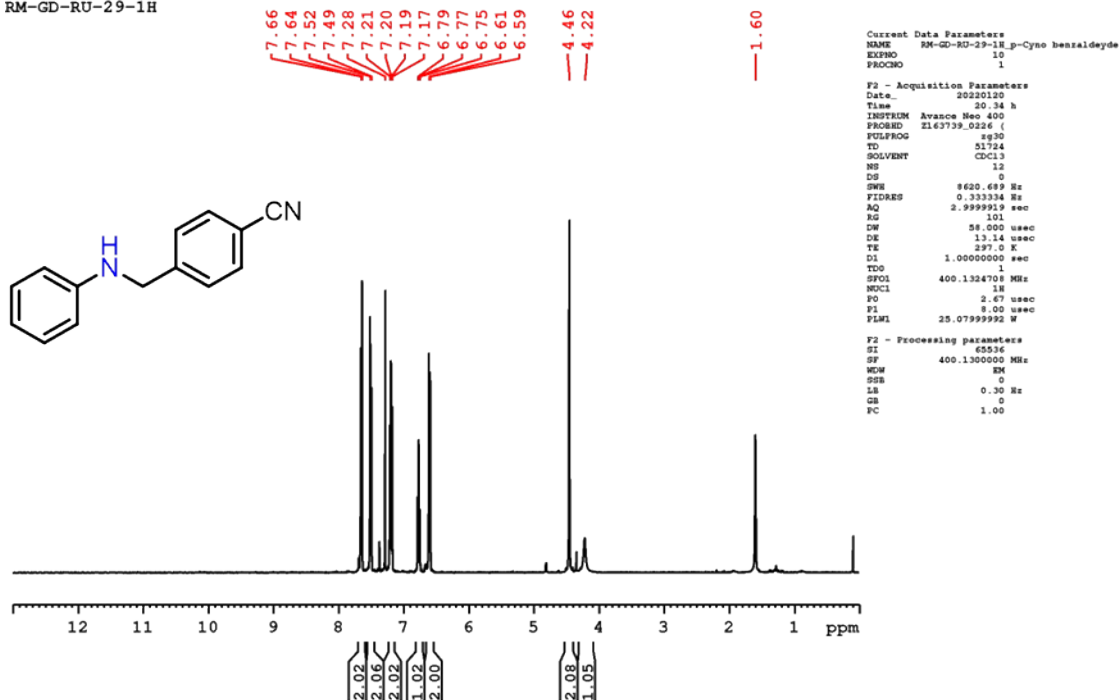

Figure S53. <sup>1</sup>H NMR spectrum of complex **2c** in CDCl<sub>3</sub> (400 MHz).

RM-GD-RU-29-13C

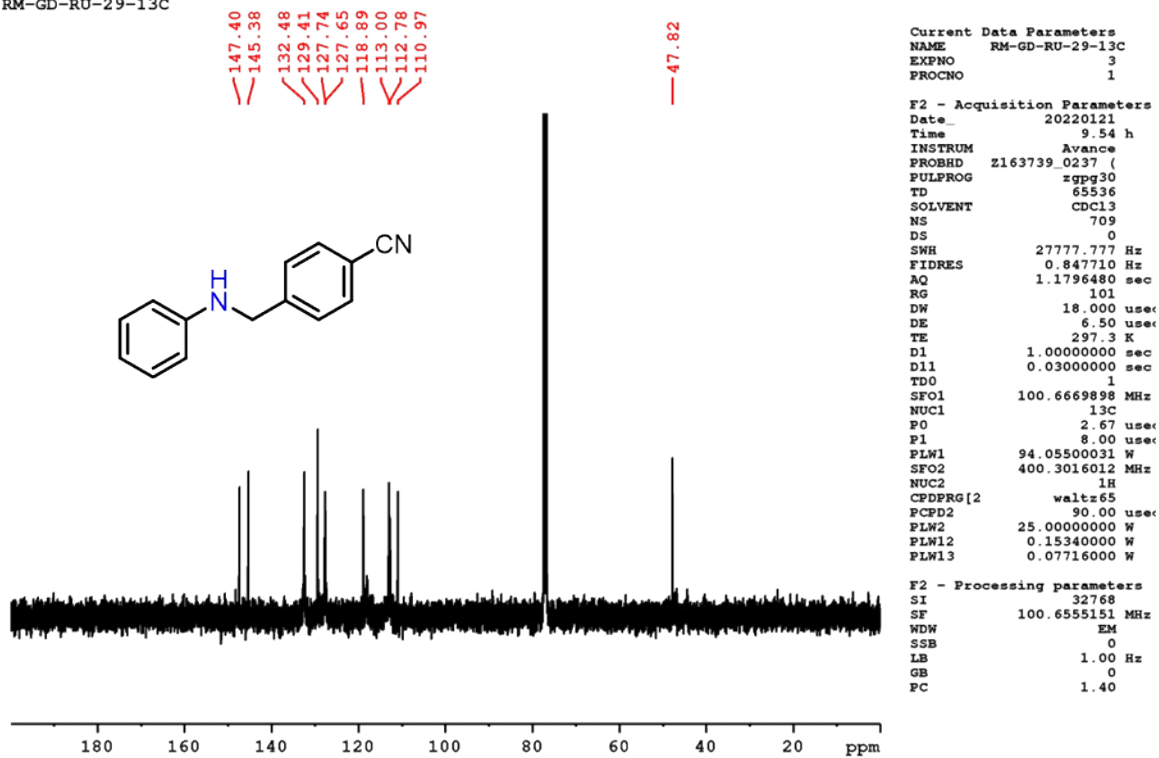

Figure S54. <sup>13</sup>C NMR spectrum of complex **2c** in CDCl<sub>3</sub> (100 MHz).



RM-GD-RU-52A-1H

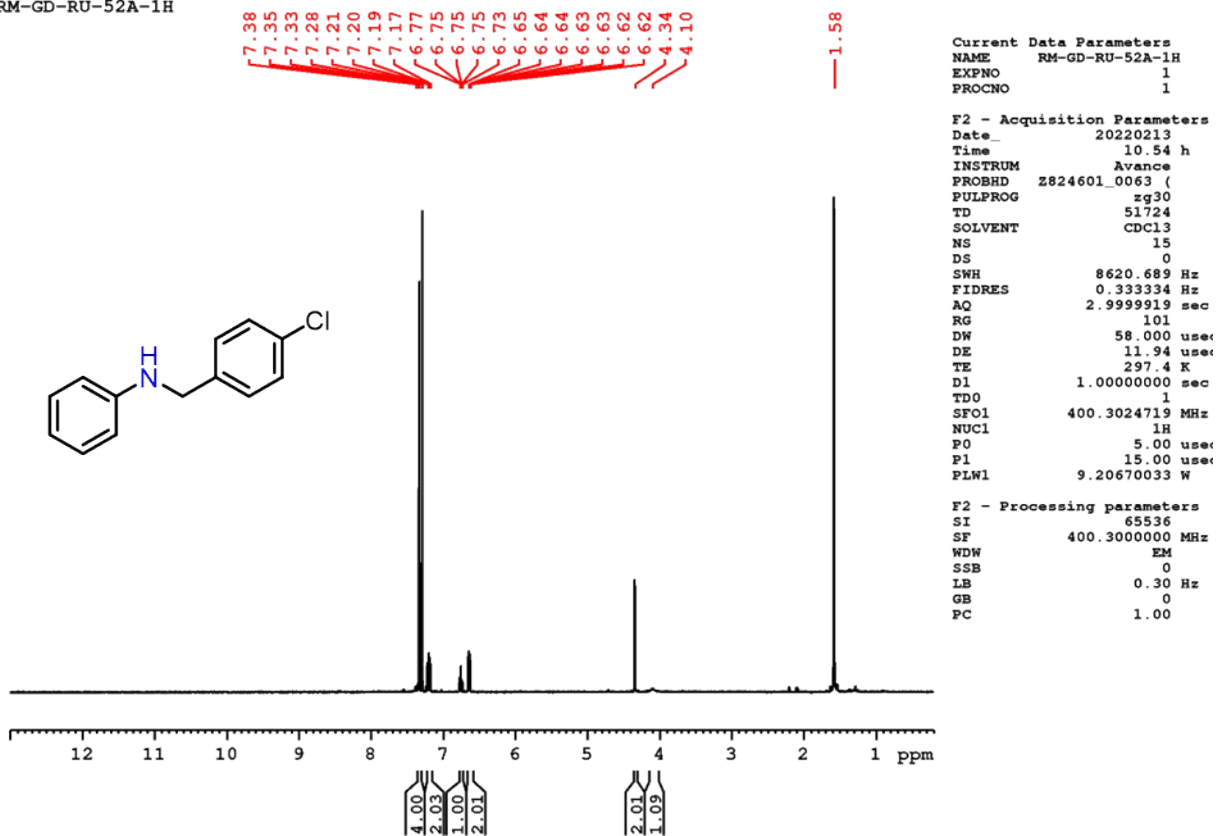

Figure S61. <sup>1</sup>H NMR spectrum of complex **2g** in CDCl<sub>3</sub> (400 MHz).

RM-GD-RU-52-13C

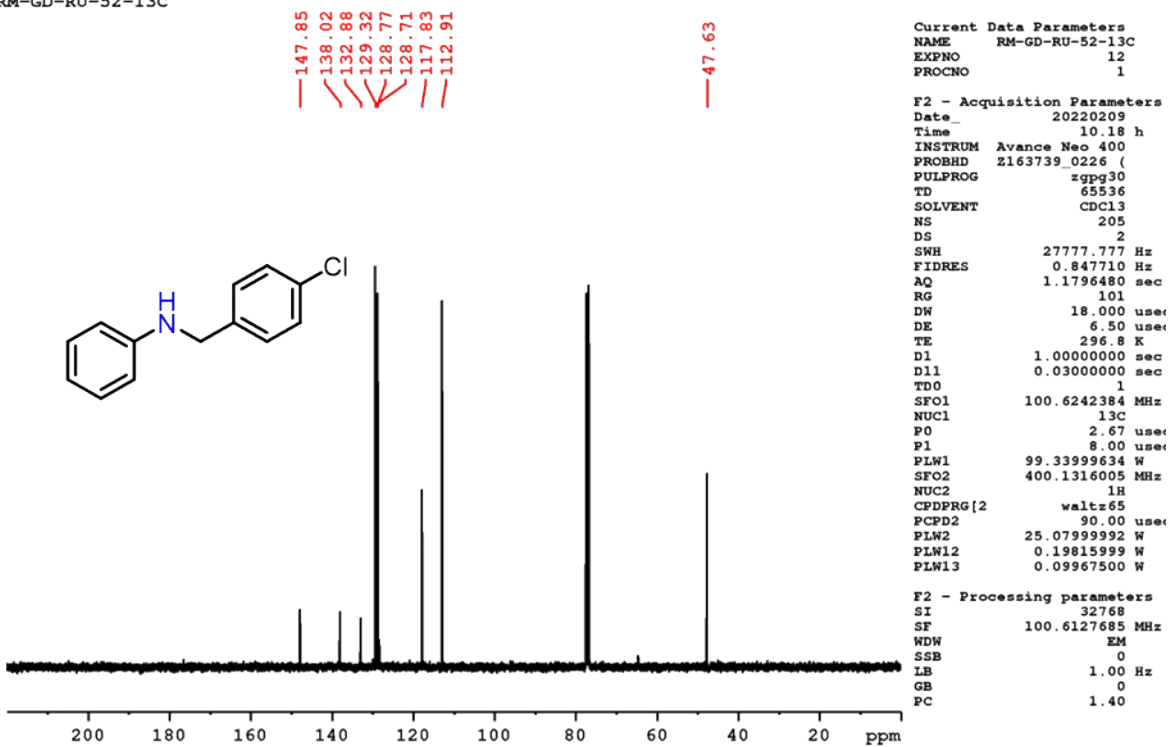

Figure S62. <sup>13</sup>C NMR spectrum of complex **2g** in CDCl<sub>3</sub> (100 MHz).

RM-GD-CAT-66A-1H

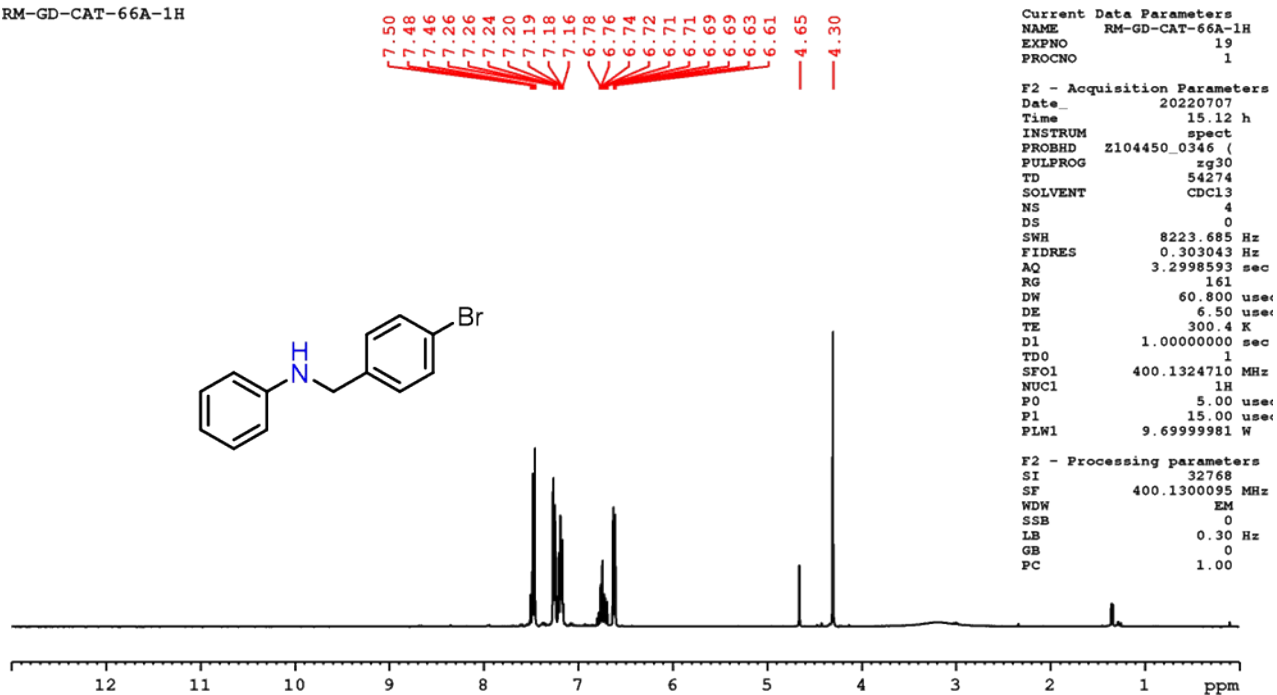

Figure S63. <sup>1</sup>H NMR spectrum of complex **2h** in CDCl<sub>3</sub> (400 MHz).

rm-gd-ru-30a-13c

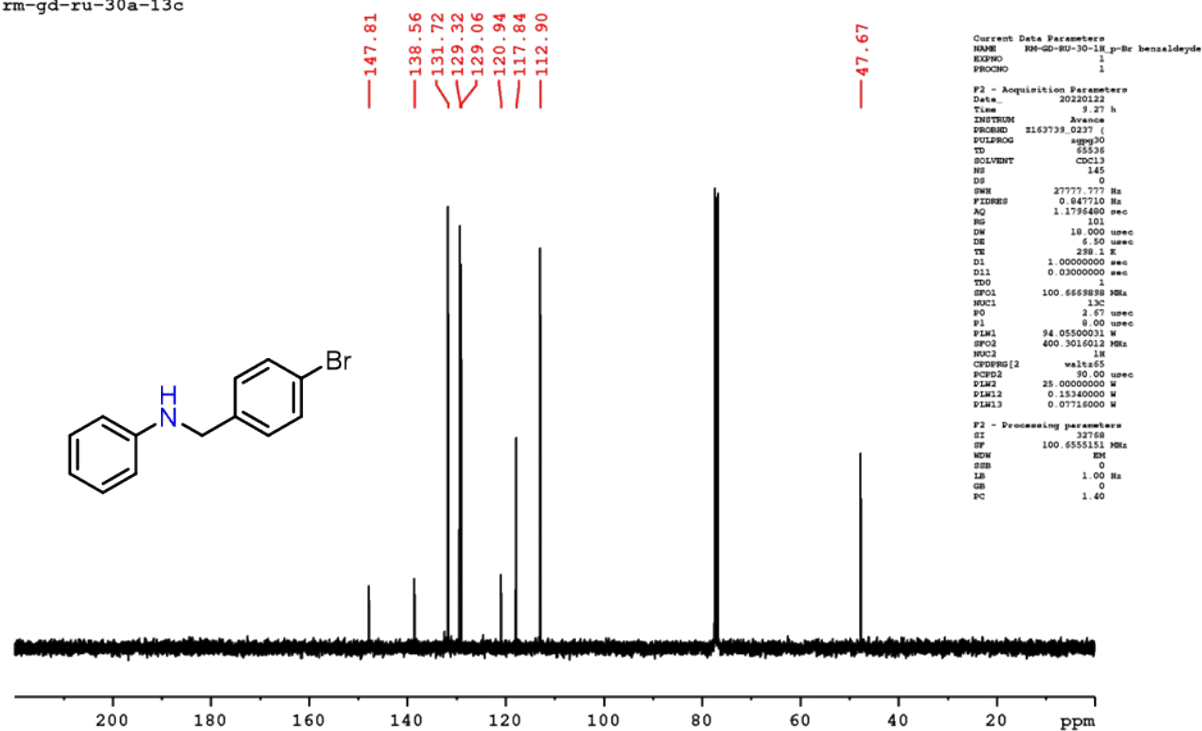

Figure S64. <sup>13</sup>C NMR spectrum of complex **2h** in CDCl<sub>3</sub> (100 MHz).

RM-GD-RU-56-1H

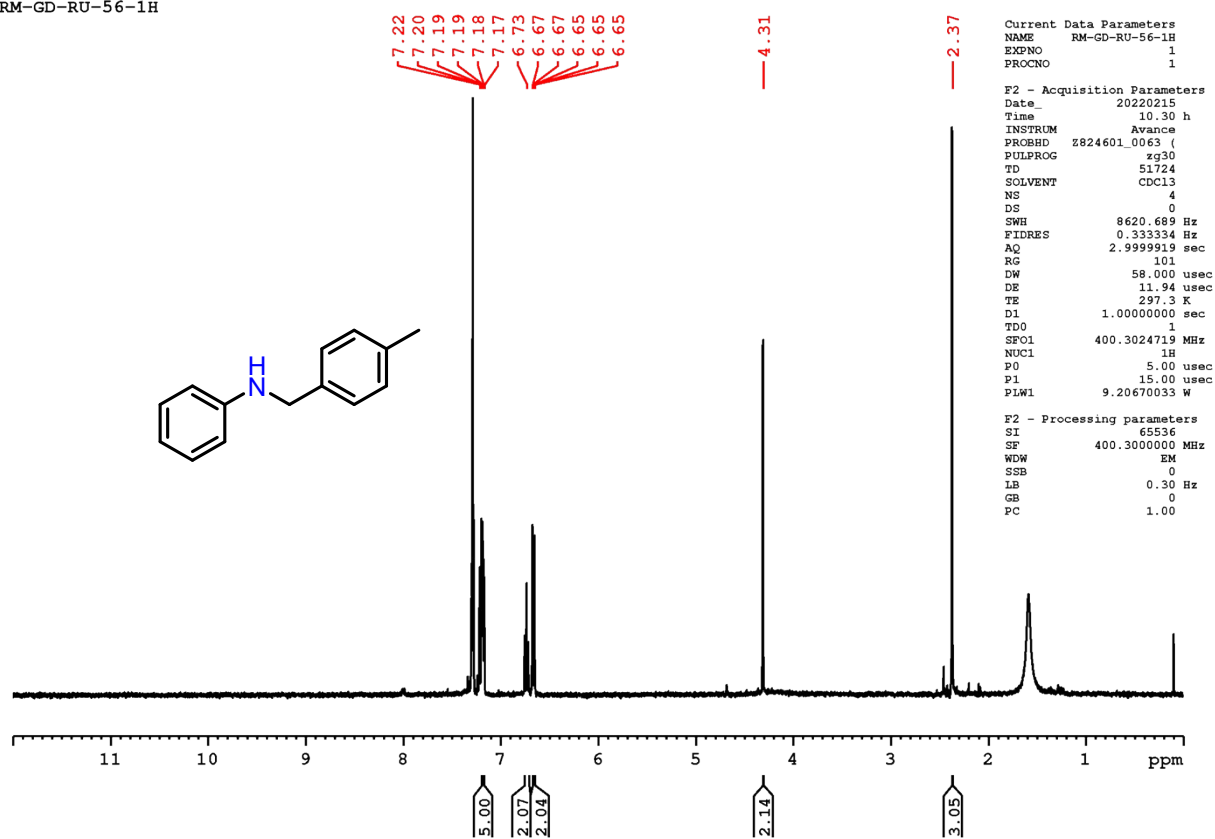

Figure S65. <sup>1</sup>H NMR spectrum of complex 2d in CDCl<sub>3</sub> (400 MHz).

RM-GD-RU-56B-13C

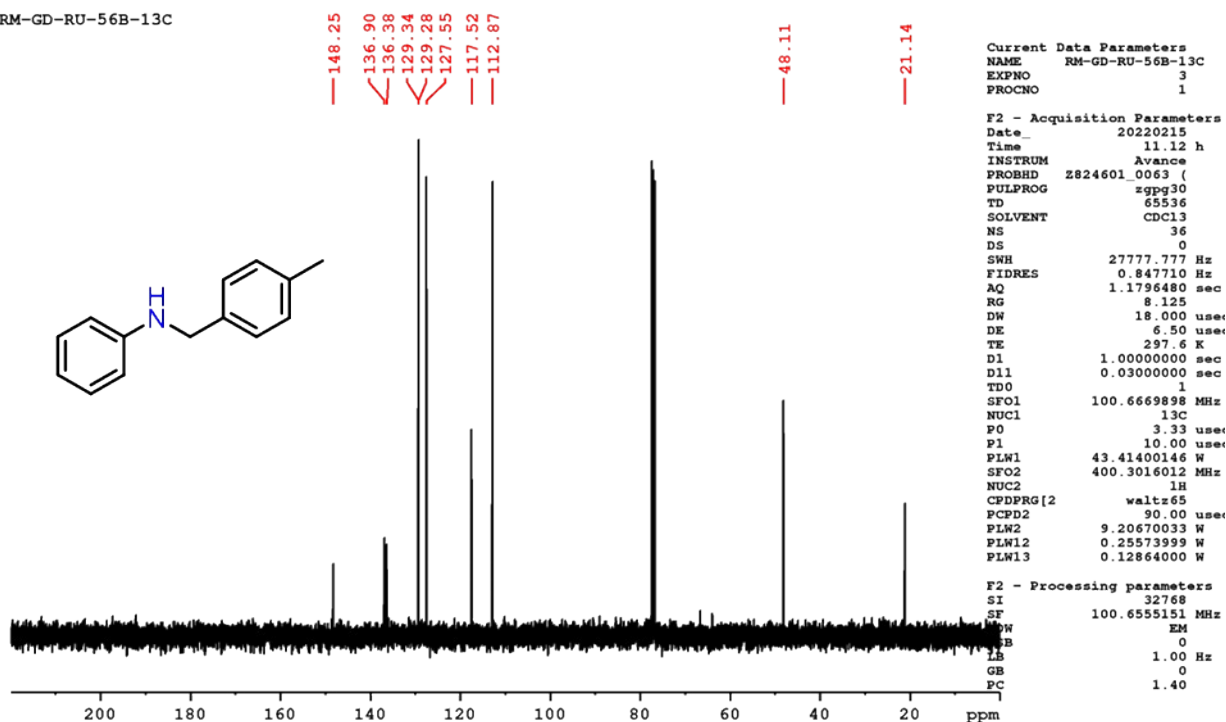

Figure S66. <sup>13</sup>C NMR spectrum of complex 2d in CDCl<sub>3</sub> (100 MHz).

RM-GD-CAT-73-1H

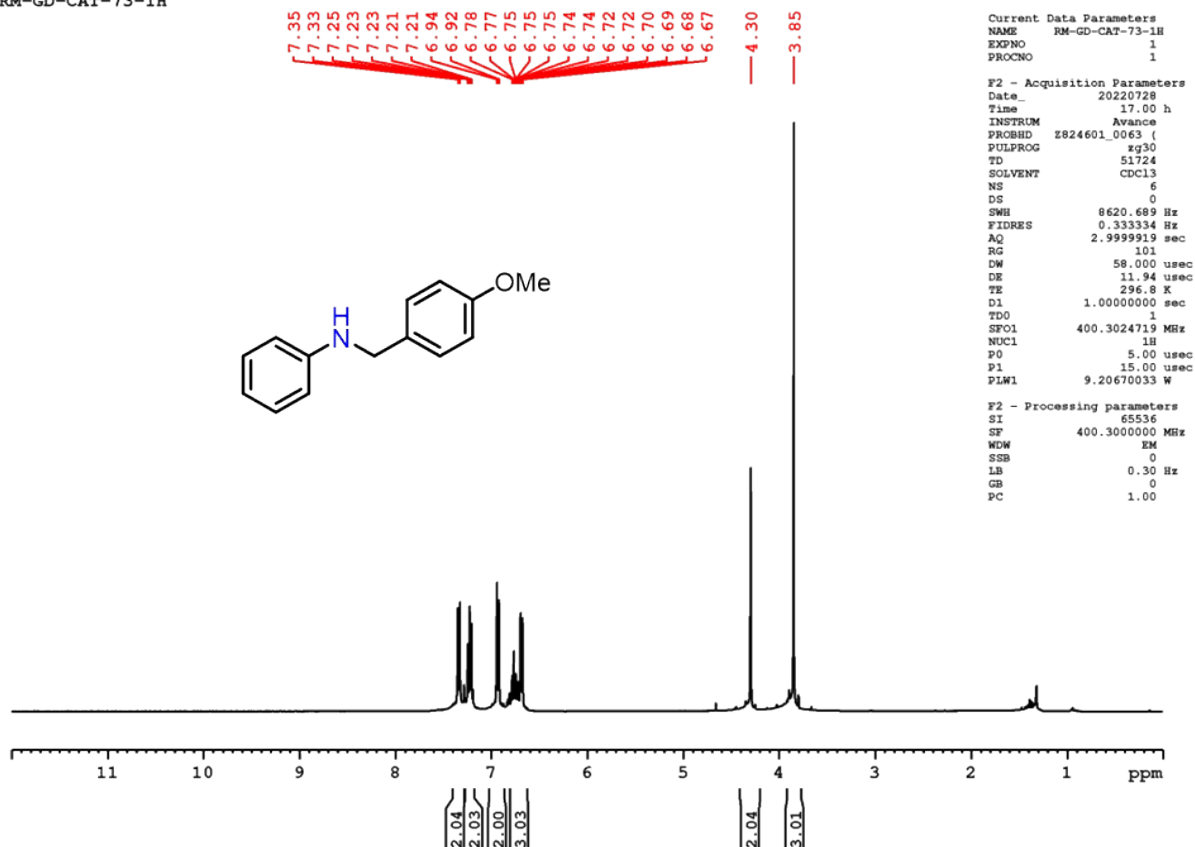

Figure S67. <sup>1</sup>H NMR spectrum of complex 2e in CDCl<sub>3</sub> (400 MHz).

RM-GD-CAT-73-13C

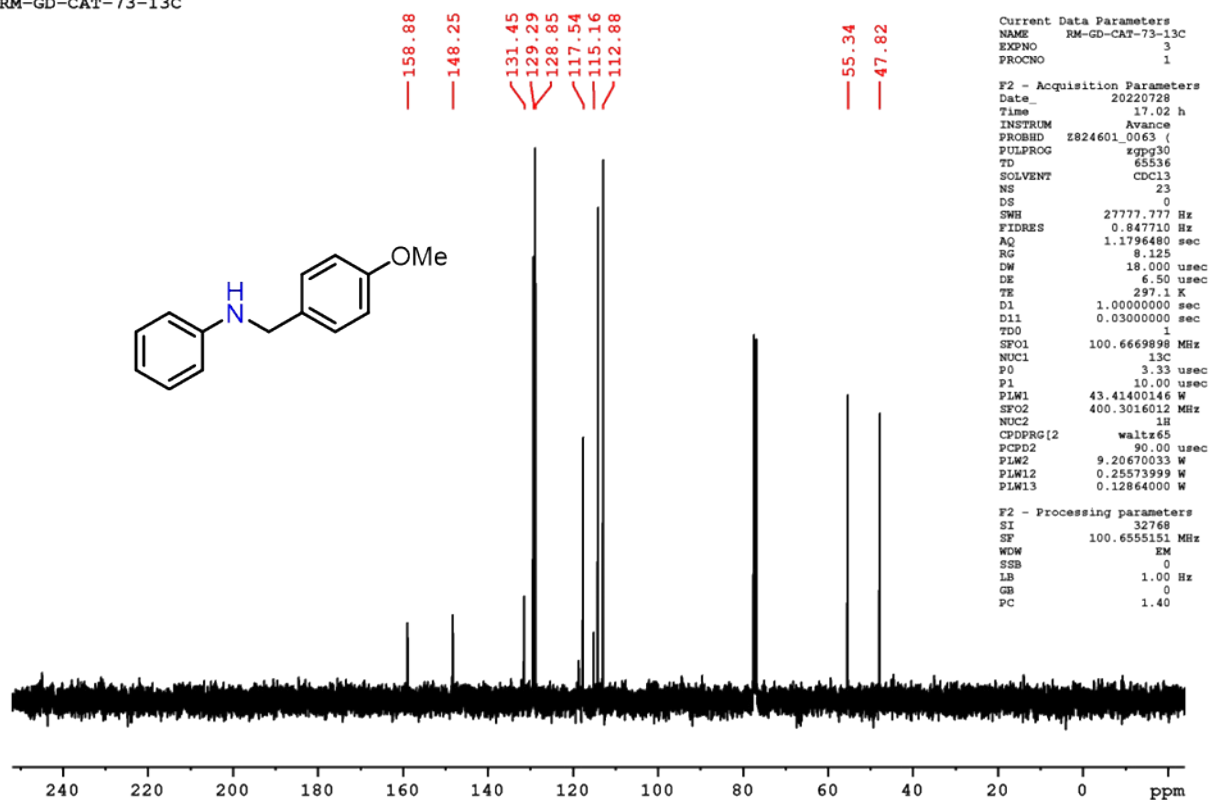

Figure S68. <sup>13</sup>C NMR spectrum of complex 2e in CDCl<sub>3</sub> (100 MHz).

RM-GD-CAT-69A-1H

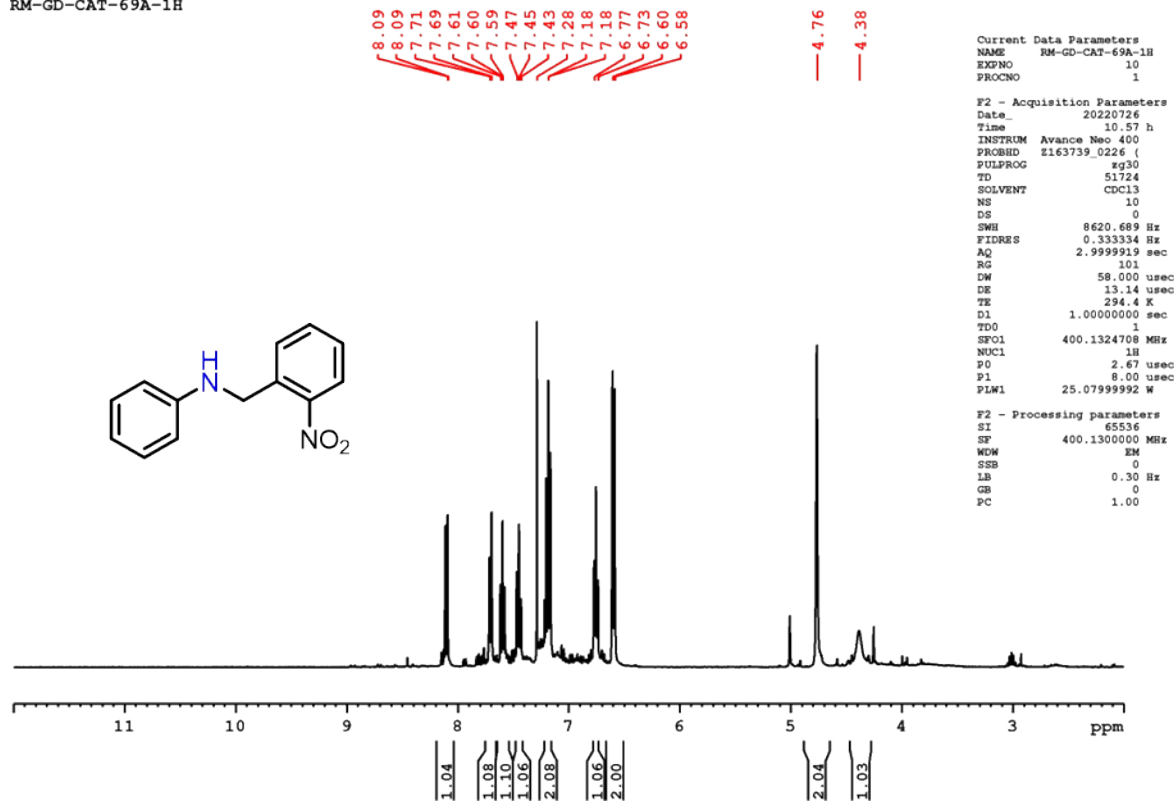

Figure S69. <sup>1</sup>H NMR spectrum of complex **2i** in CDCl<sub>3</sub> (400 MHz).

RM-GD-CAT-69A-13C

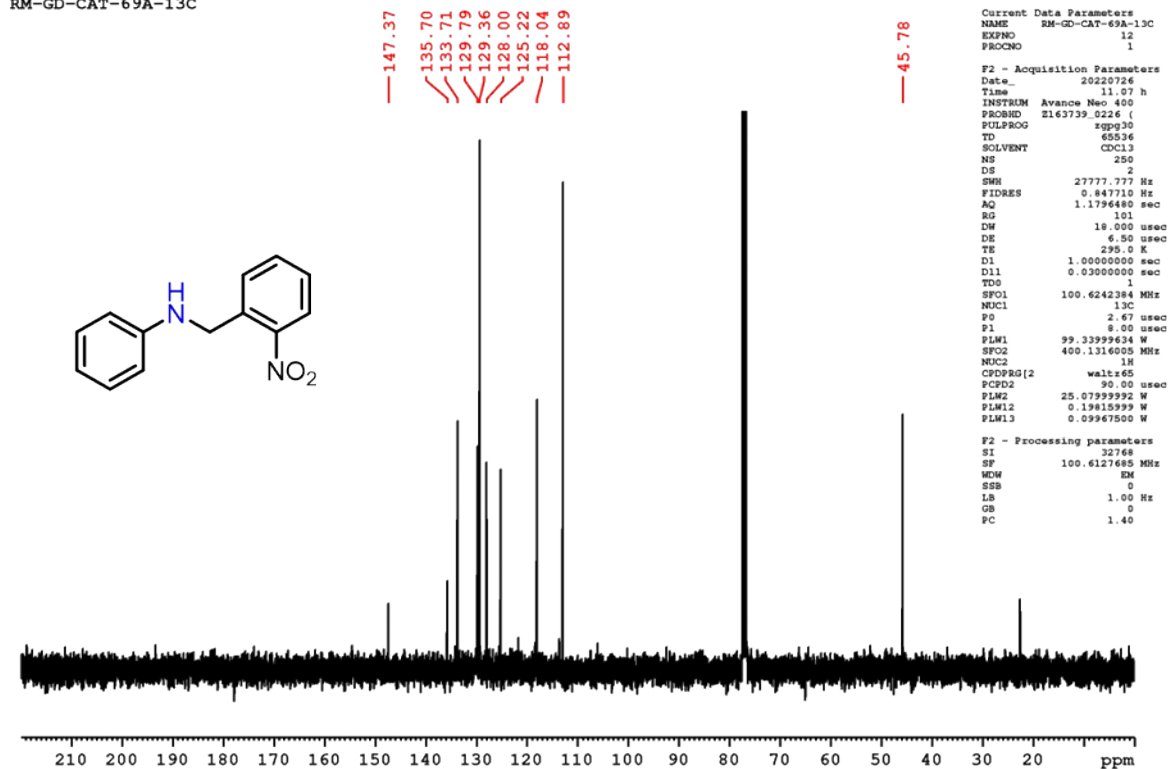

Figure S70. <sup>13</sup>C NMR spectrum of complex **2i** in CDCl<sub>3</sub> (100 MHz).



RM-GD-CAT-70-1H

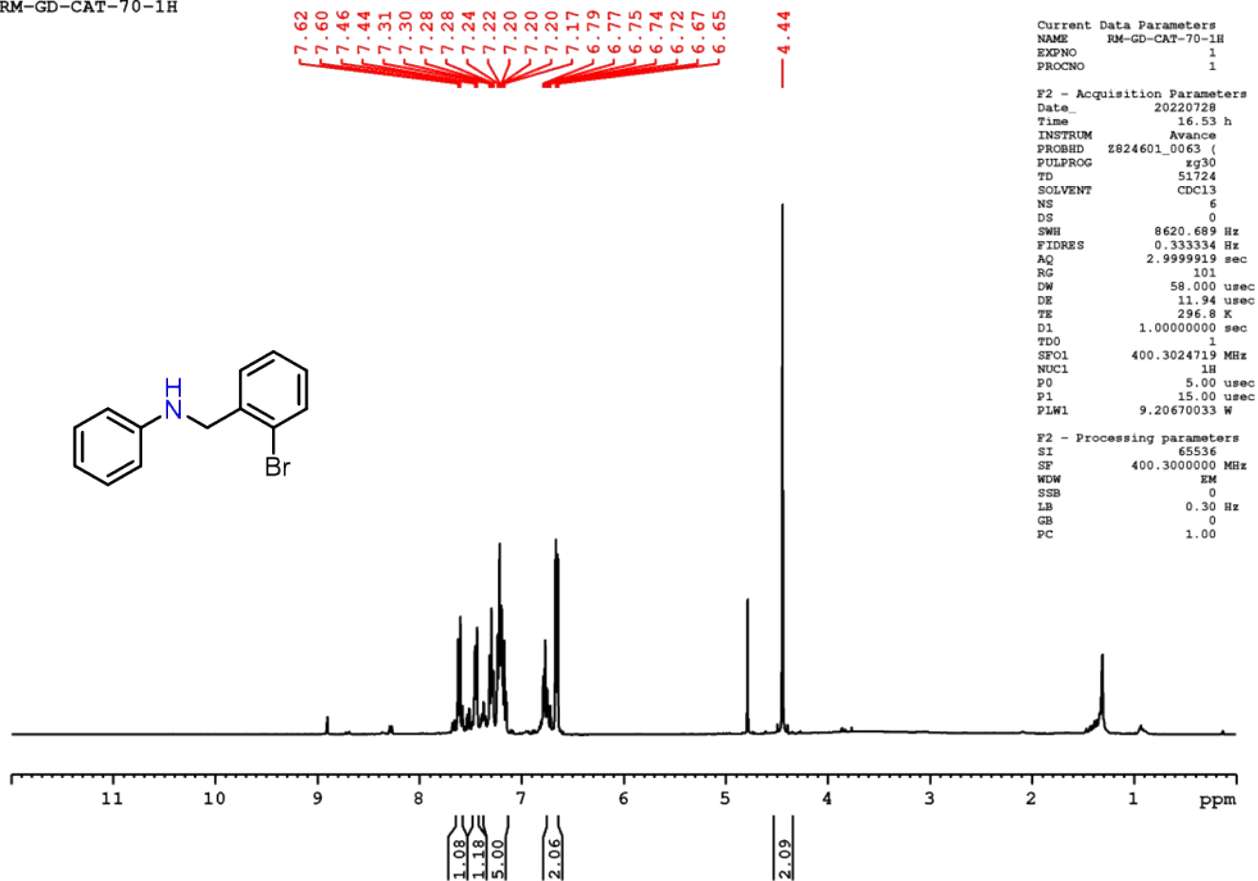

Figure S71. <sup>1</sup>H NMR spectrum of complex **2j** in CDCl<sub>3</sub> (400 MHz).

RM-GD-CAT-70-13C

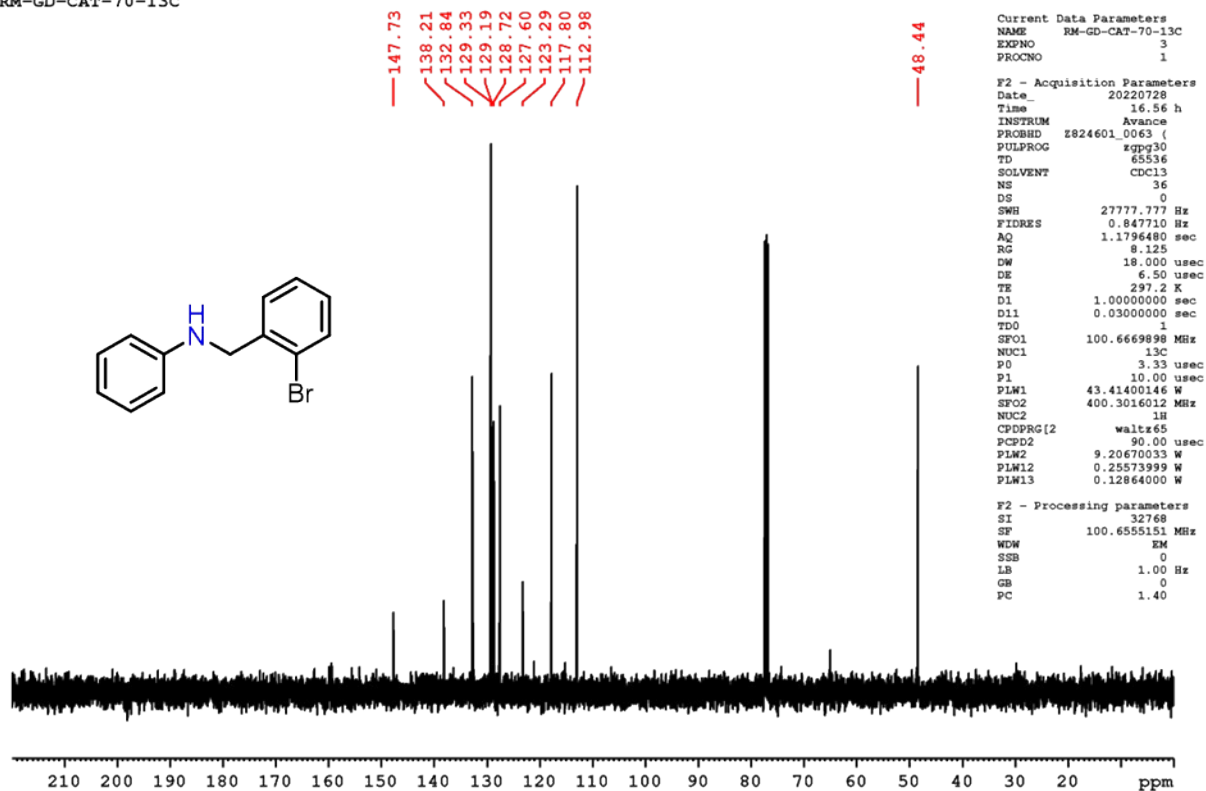

Figure S72. <sup>13</sup>C NMR spectrum of complex **2j** in CDCl<sub>3</sub> (100 MHz).

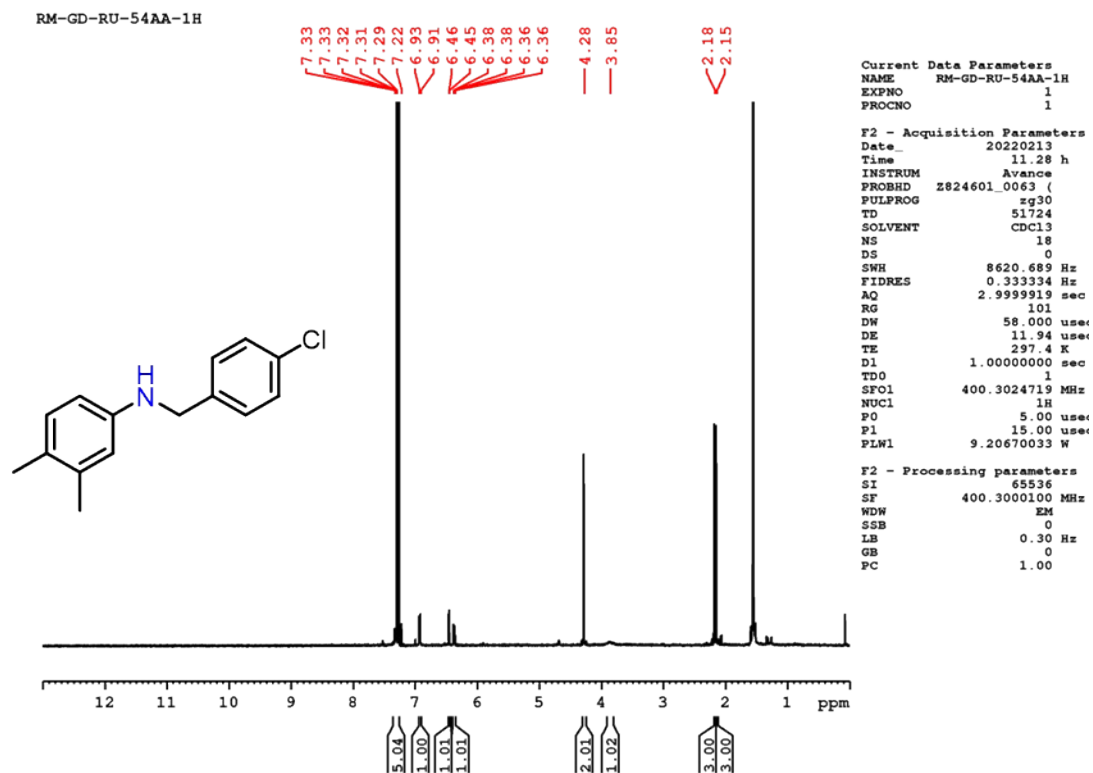

Figure S73.  $^1\text{H}$  NMR spectrum of complex **2p** in  $\text{CDCl}_3$  (400 MHz).

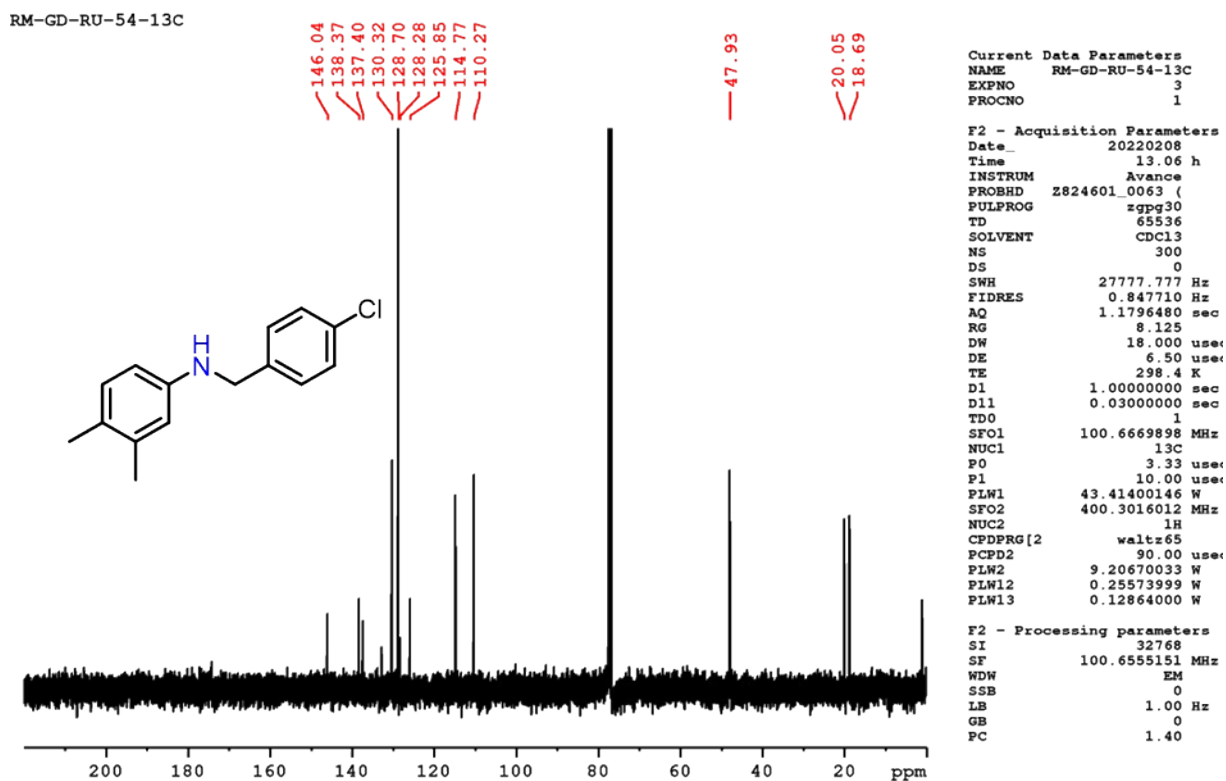

Figure S74.  $^{13}\text{C}$  NMR spectrum of complex **2p** in  $\text{CDCl}_3$  (100 MHz).

RM-GD-CAT-75-1H

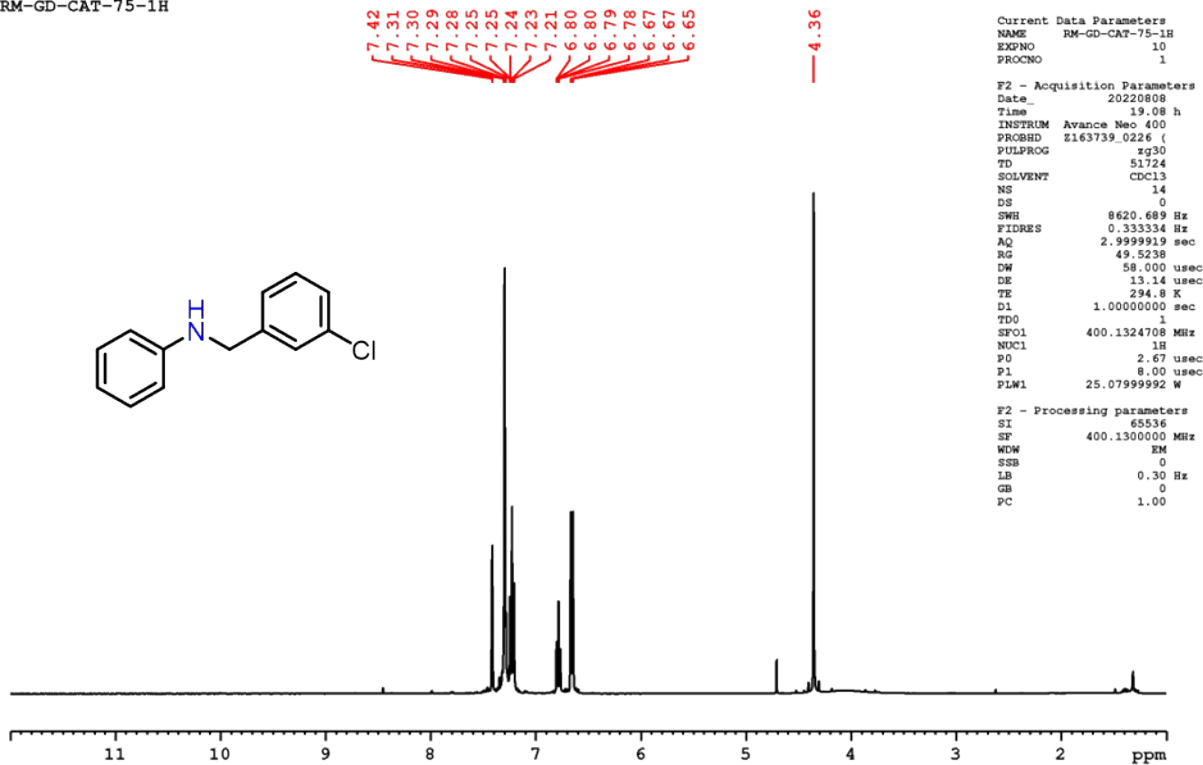

Figure S75. <sup>1</sup>H NMR spectrum of complex 2k in CDCl<sub>3</sub> (400 MHz).

RM-GD-CAT-75-13C

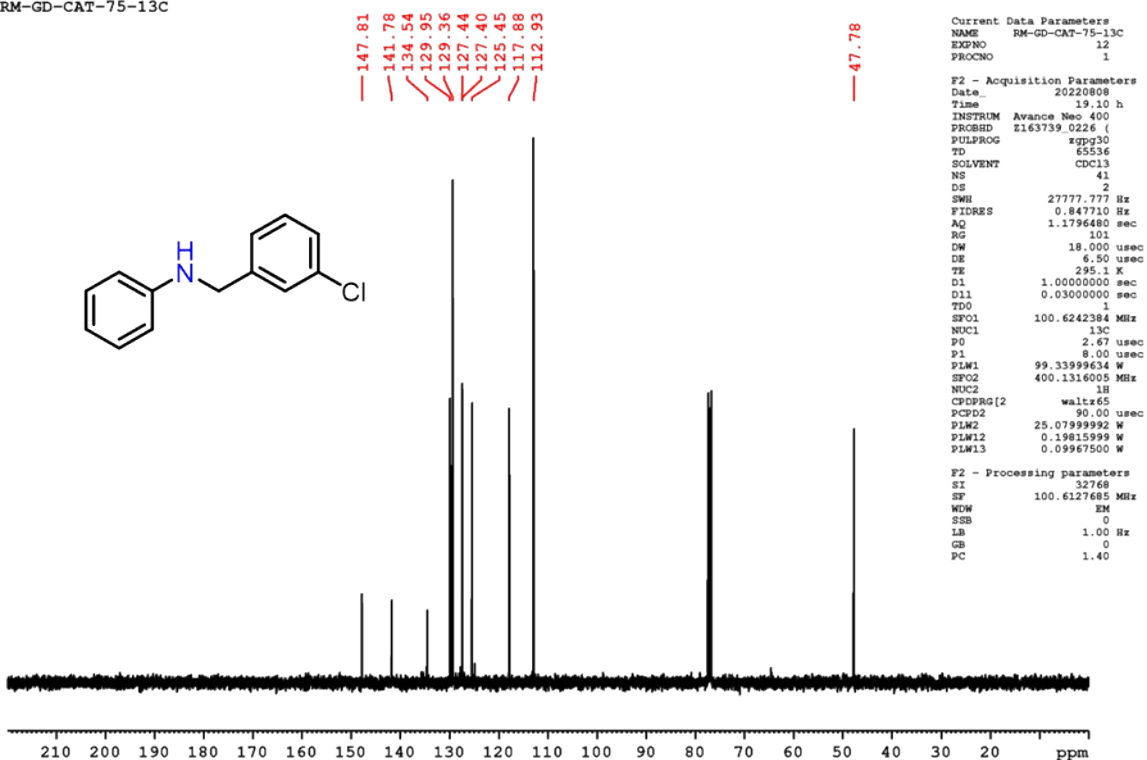

Figure S76. <sup>13</sup>C NMR spectrum of complex 2k in CDCl<sub>3</sub> (100 MHz).

RM-GD-RU-51B-1H

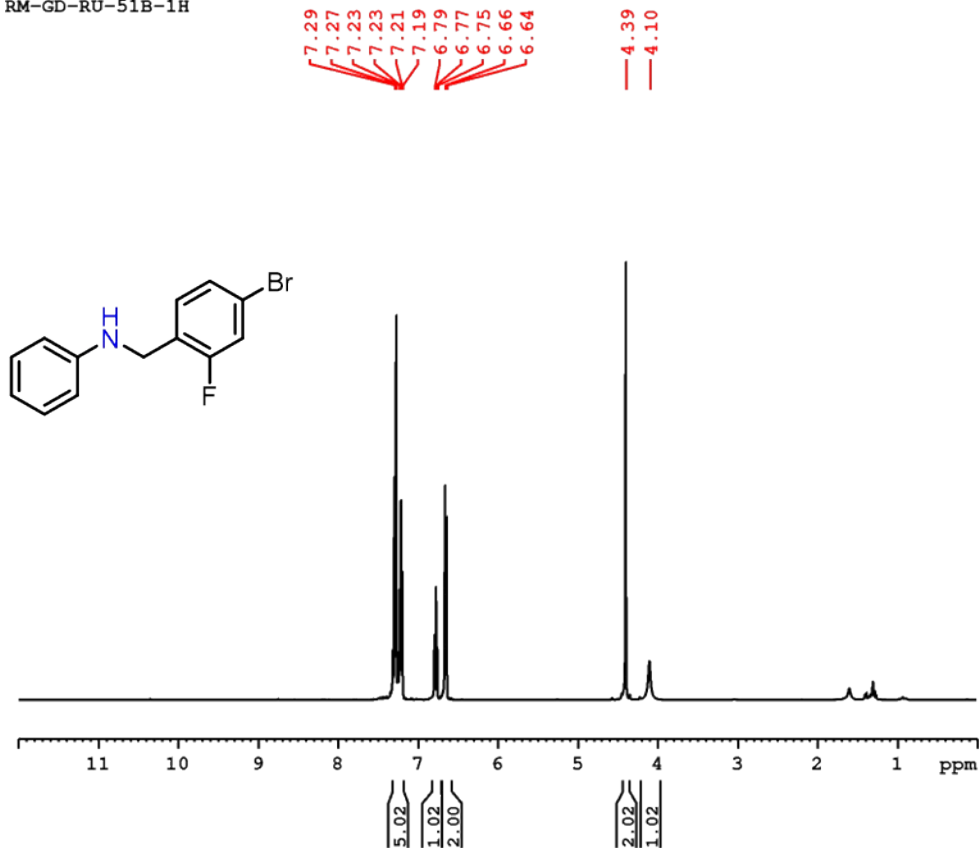

```

Current Data Parameters
NAME      RM-GD-RU-51B-1H
EXPNO    10
PROCNO   1

F2 - Acquisition Parameters
Date_    20220209
Time     10.22 h
INSTRUM  Avance Neo 400
PROBHD   Z163739_0226 (
PULPROG  zg30
TD       51724
SOLVENT  CDCl3
NS       15
DS       0
SWH      8620.689 Hz
FIDRES   0.333334 Hz
AQ       2.9999919 sec
RG       69.3333
DW       58.000 usec
DE       13.14 usec
TE       296.7 K
D1       1.00000000 sec
TD0      1
SF01     400.1324708 MHz
NUC1     1H
P0       2.67 usec
P1       8.00 usec
PLW1     25.07999992 W

F2 - Processing parameters
SI       65536
SF       400.1300000 MHz
WDW      EM
SSB      0
LB       0.30 Hz
GB       0
PC       1.00
  
```

Figure S77. <sup>1</sup>H NMR spectrum of complex 2I in CDCl<sub>3</sub> (400 MHz).

RM-GD-RU-51-13C

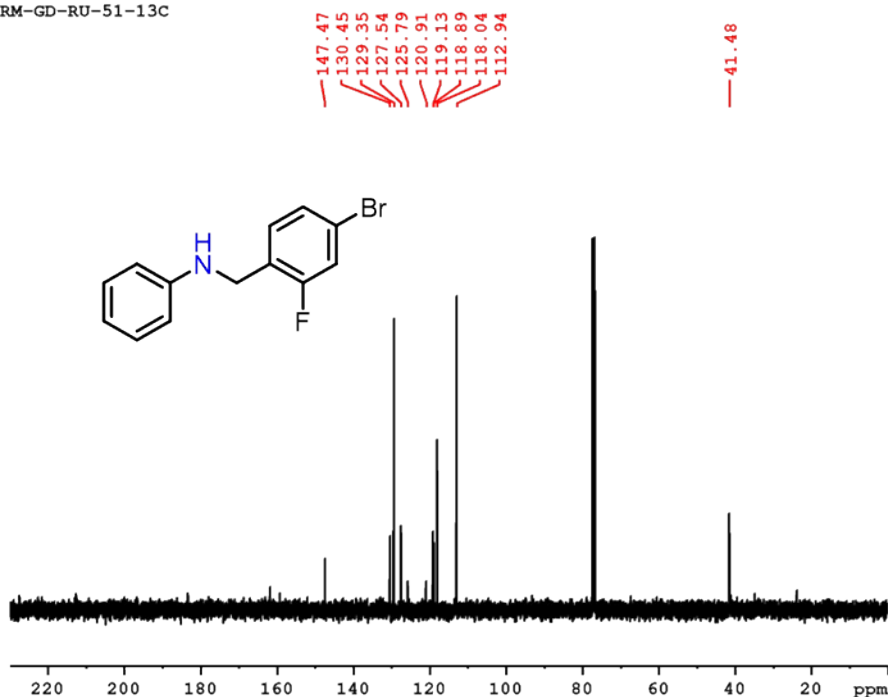

```

Current Data Parameters
NAME      RM-GD-RU-51-13C
EXPNO    3
PROCNO   1

F2 - Acquisition Parameters
Date_    20220207
Time     17.37 h
INSTRUM  Avance
PROBHD   Z824601_0063 (
PULPROG  zgpg30
TD       65536
SOLVENT  CDCl3
NS       144
DS       0
SWH      27777.777 Hz
FIDRES   0.847710 Hz
AQ       1.1796480 sec
RG       8.125
DW       18.000 usec
DE       6.50 usec
TE       297.4 K
D1       1.00000000 sec
D11      0.03000000 sec
TD0      1
SF01     100.6669898 MHz
NUC1     13C
P0       3.33 usec
P1       10.00 usec
PLW1     43.41400146 W
SF02     400.3016012 MHz
NUC2     1H
CPDPRG[2] waltz65
PCPD2    90.00 usec
PLW2     9.20670033 W
PLW12    0.25573999 W
PLW13    0.12864000 W

F2 - Processing parameters
SI       32768
SF       100.6555151 MHz
WDW      EM
SSB      0
LB       1.00 Hz
GB       0
PC       1.40
  
```

Figure S78. <sup>13</sup>C NMR spectrum of complex 2I in CDCl<sub>3</sub> (100 MHz).

Fig

RM-GD-RU-CAT-68-1H

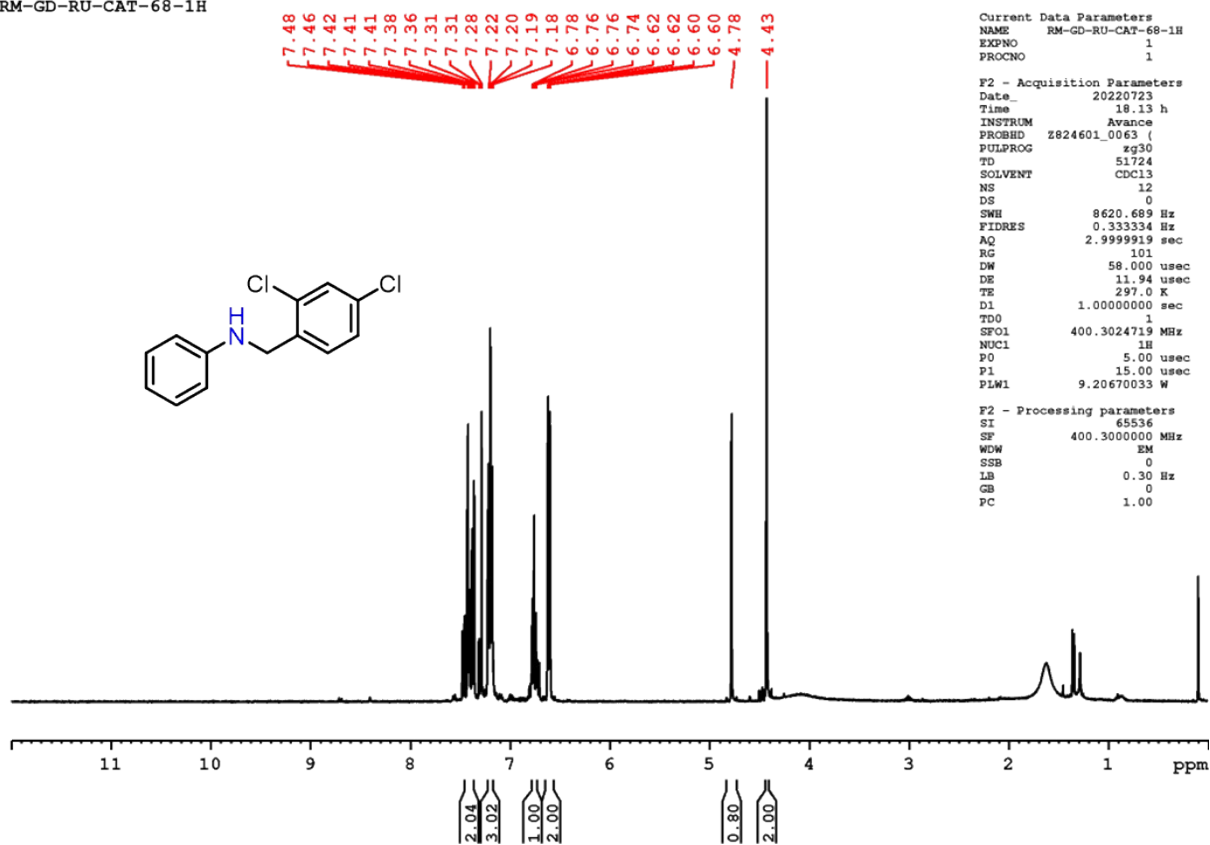

Figure S79. <sup>1</sup>H NMR spectrum of complex **2m** in CDCl<sub>3</sub> (400 MHz).

RM-GD-CAT-68-13C

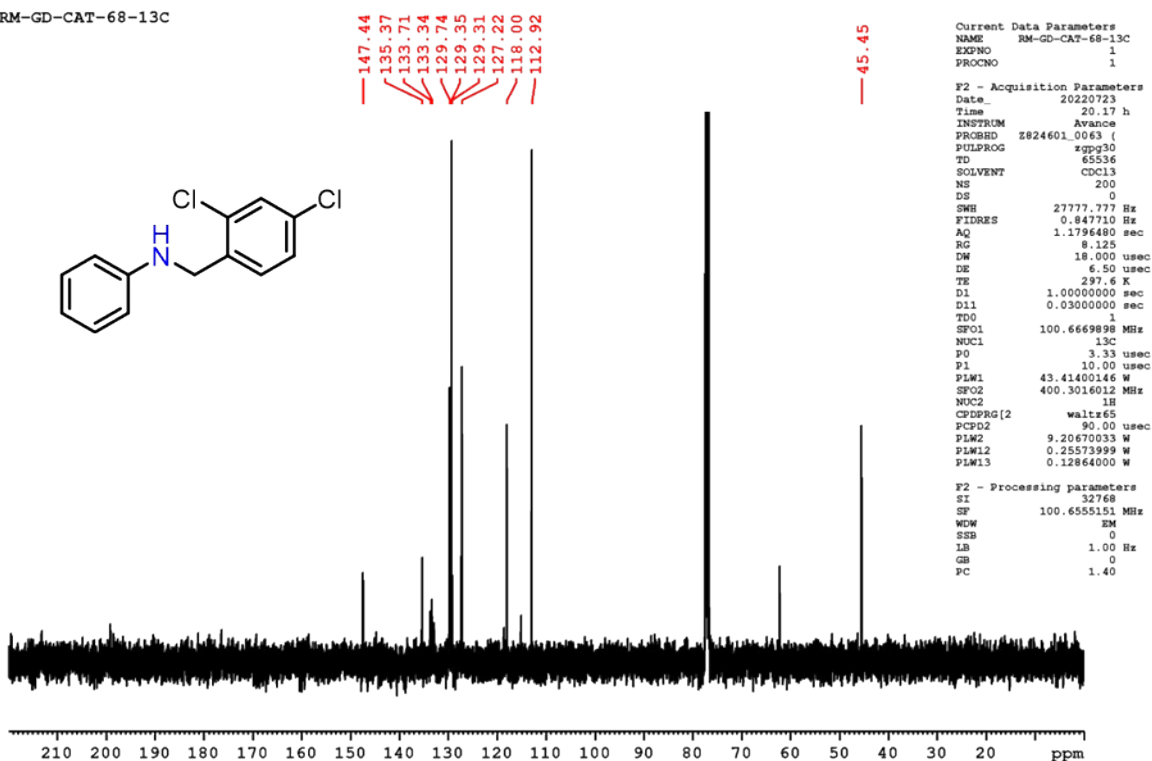

Figure S80. <sup>13</sup>C NMR spectrum of complex **2m** in CDCl<sub>3</sub> (100 MHz).

RM-GD-CAT-71-1H

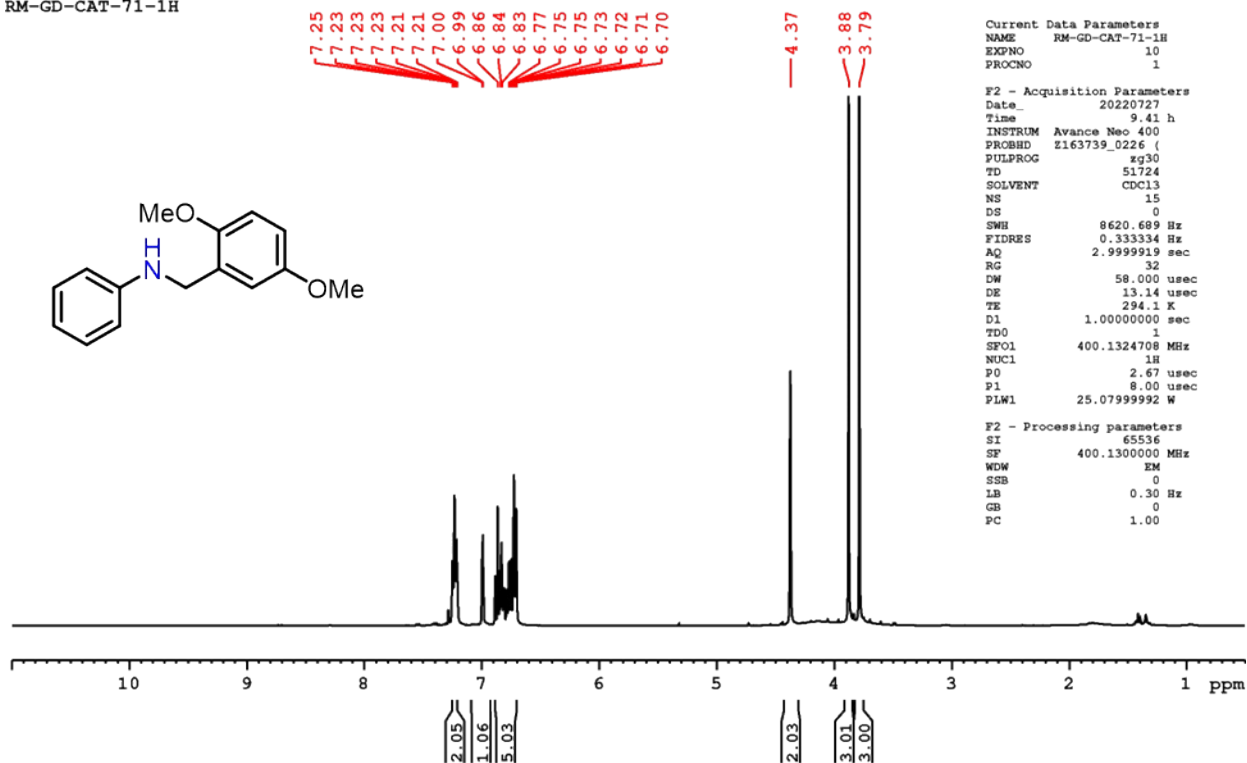

Figure S81. <sup>1</sup>H NMR spectrum of complex **2n** in CDCl<sub>3</sub> (400 MHz).

RM-GD-CAT-71-13C

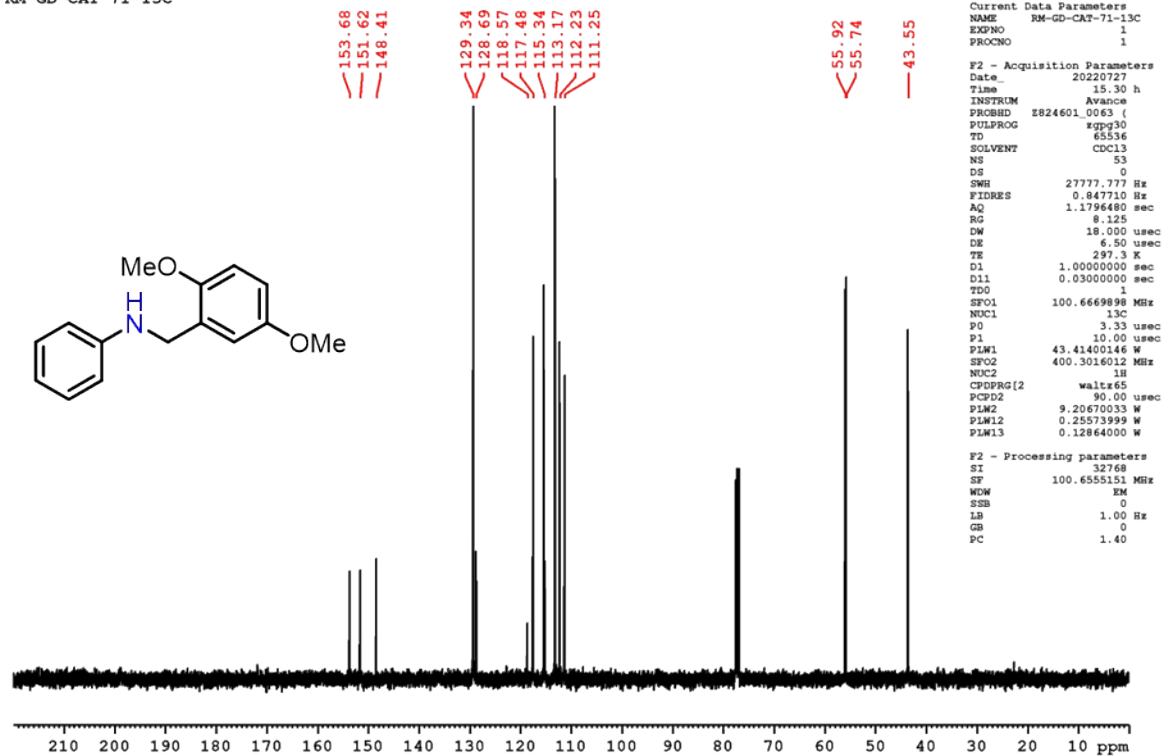

Figure S82. <sup>13</sup>C NMR spectrum of complex **2n** in CDCl<sub>3</sub> (100 MHz).

RM-GD-CAT-74-1H

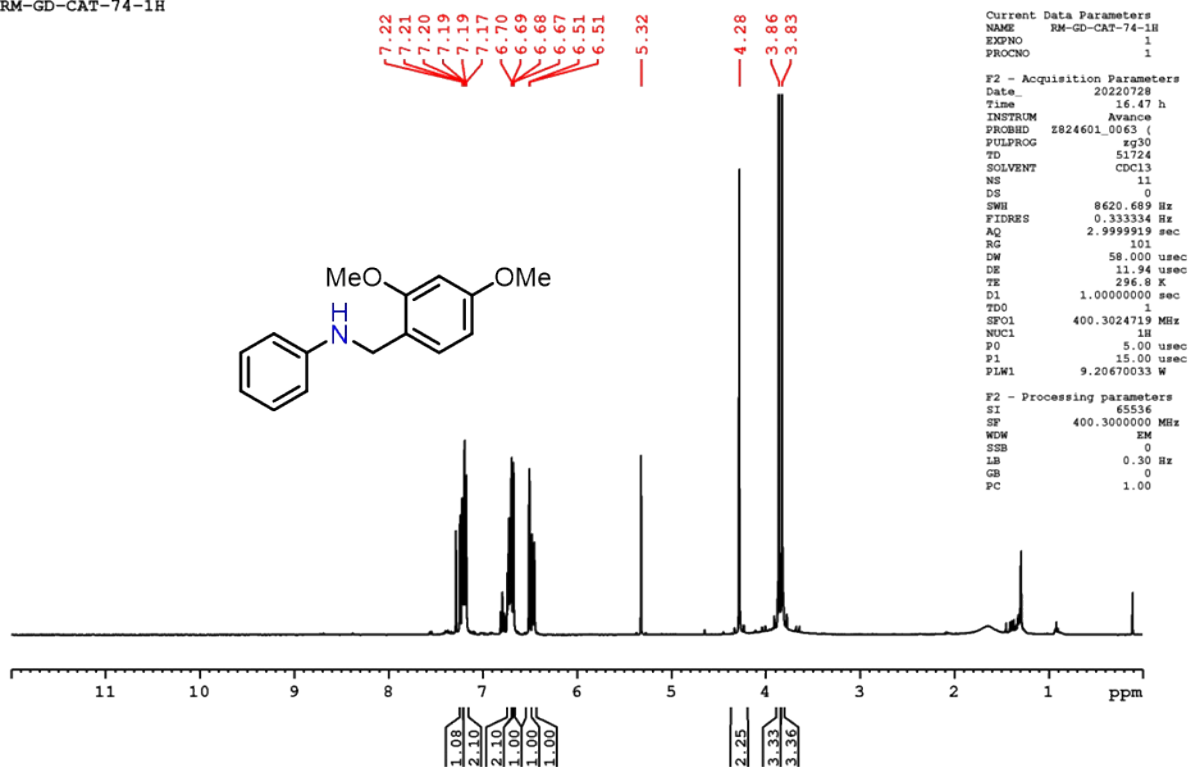

Figure S83. <sup>1</sup>H NMR spectrum of complex **2o** in CDCl<sub>3</sub> (400 MHz).

RM-GD-CAT-74-13C

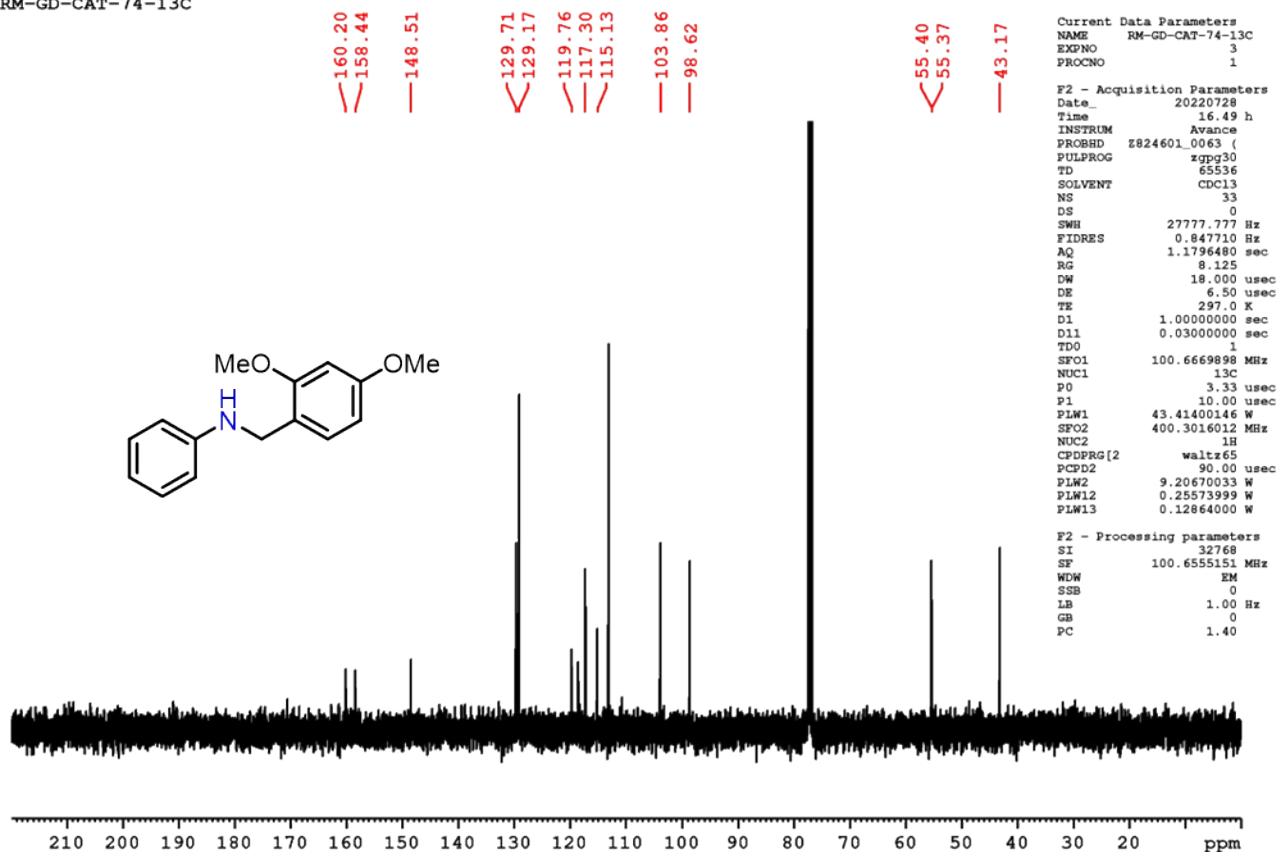

Figure S84. <sup>13</sup>C NMR spectrum of complex **2o** in CDCl<sub>3</sub> (100 MHz).

RM-GD-RU-CAT-91-1H

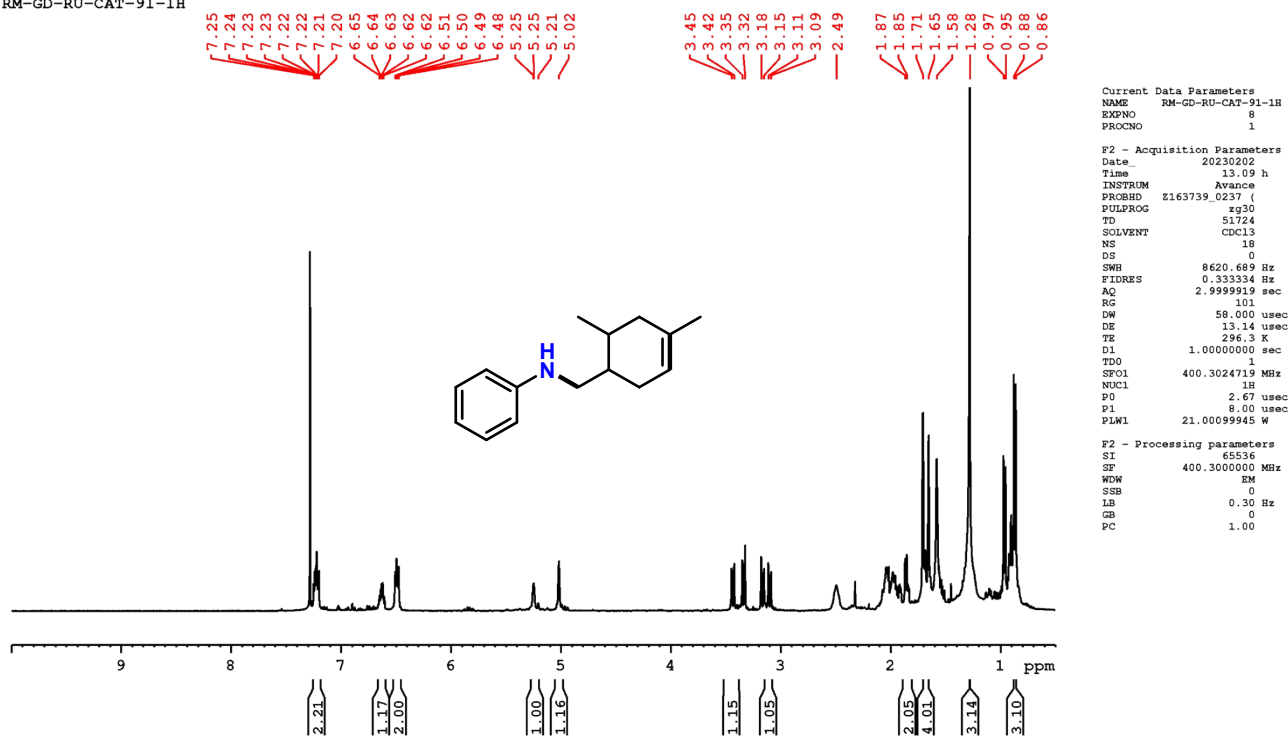

Figure S85. <sup>1</sup>H NMR spectrum of complex 2r in CDCl<sub>3</sub> (400 MHz).

RM-GD-RU-CAT-91A-13C

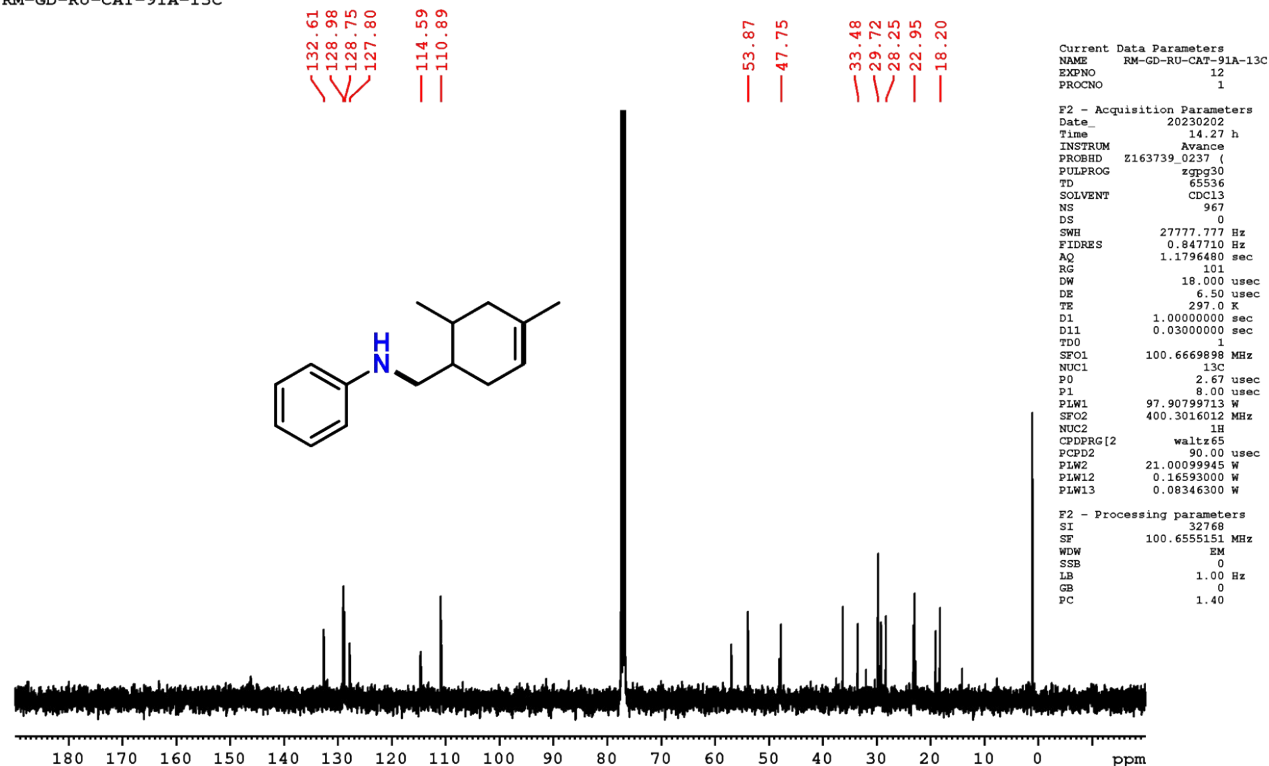

Figure S46. <sup>13</sup>C NMR spectrum of complex 2r in CDCl<sub>3</sub> (100 MHz).



RM-GD-RU-98-1H

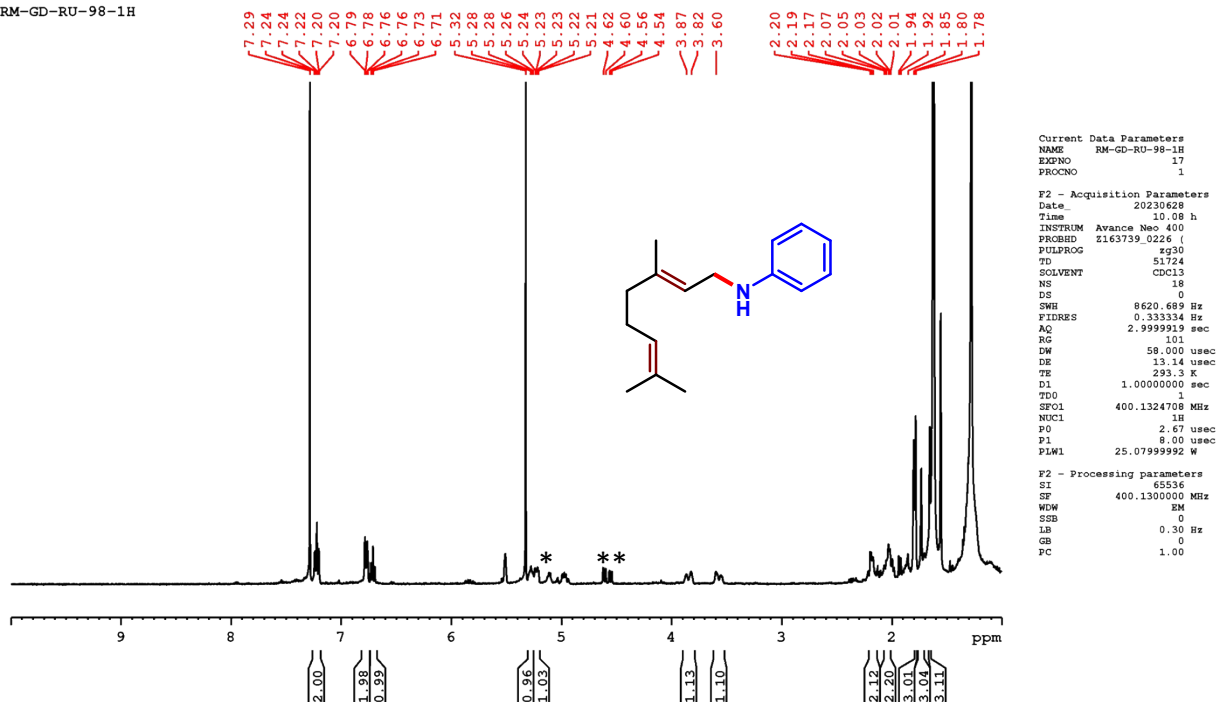

Figure S87. <sup>1</sup>H NMR spectrum of complex 2q in CDCl<sub>3</sub> (400 MHz).

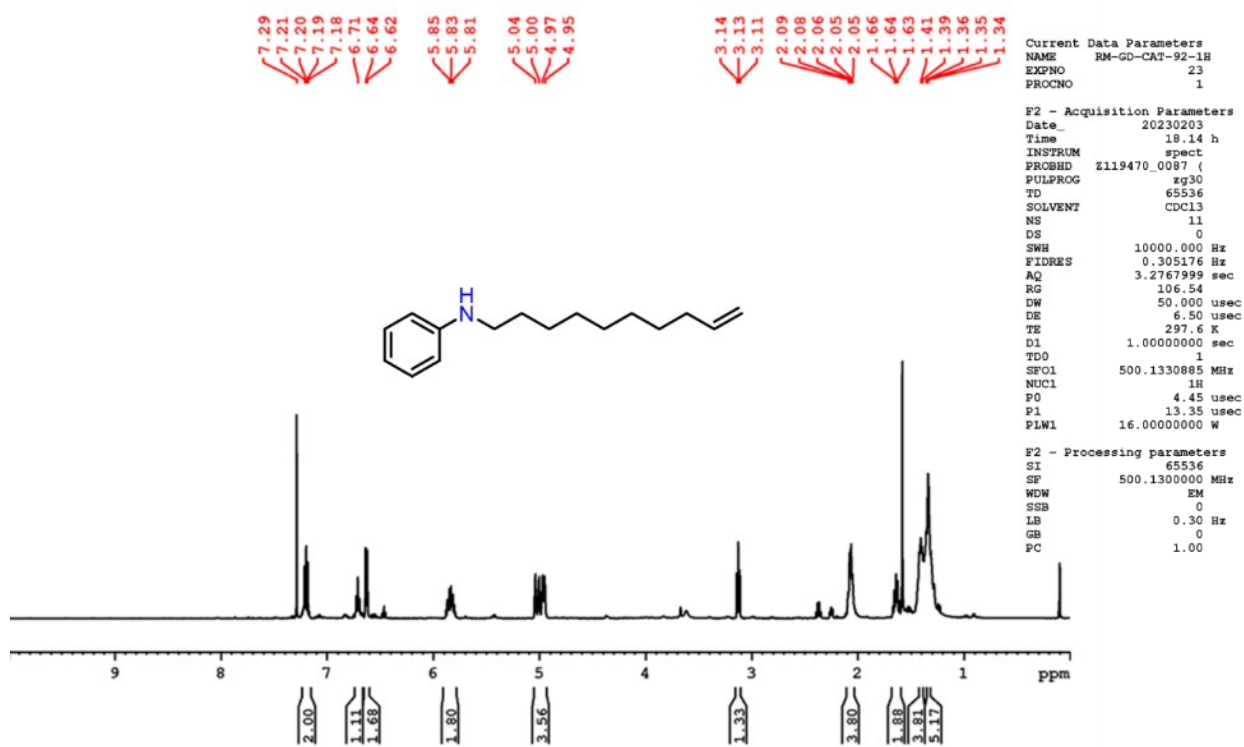

Figure S89. <sup>1</sup>H NMR spectrum of complex 2s in CDCl<sub>3</sub> (400 MHz).

RM-GD-CAT92-13C

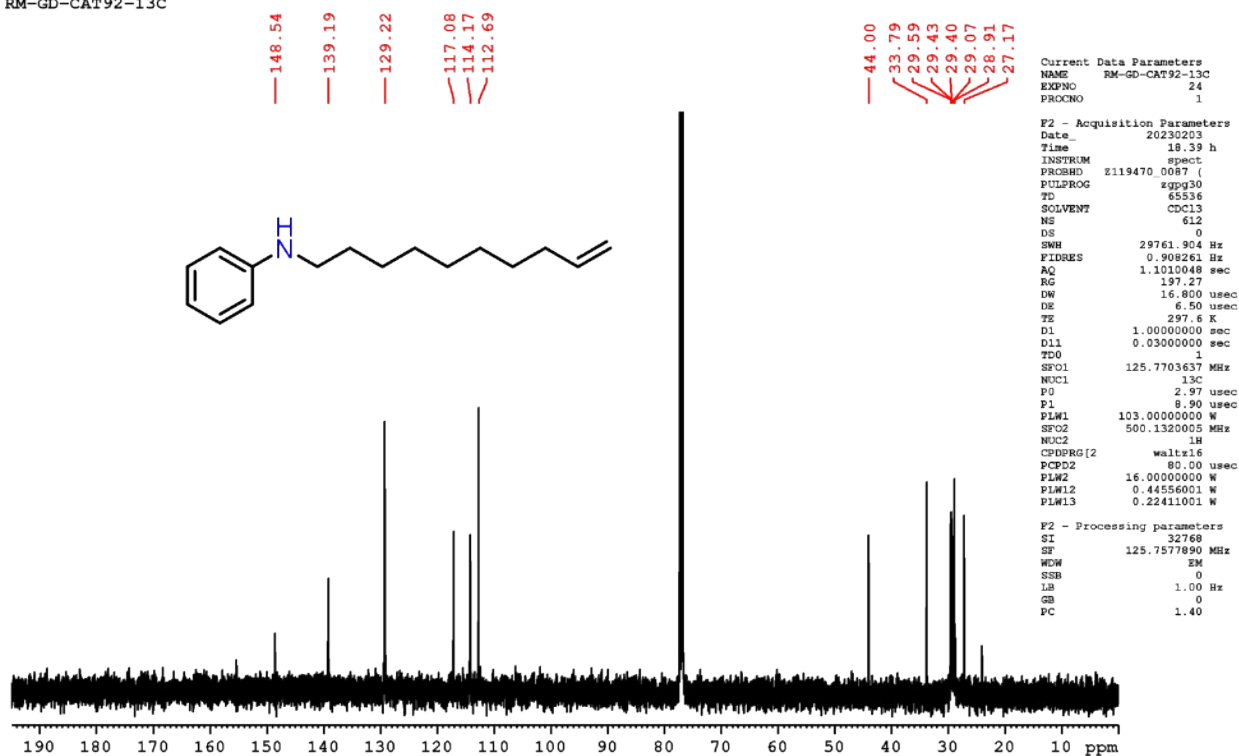

Figure S90. <sup>13</sup>C NMR spectrum of complex 2s in CDCl<sub>3</sub> (100 MHz).

RM-GD-RU-CAT-96-1H

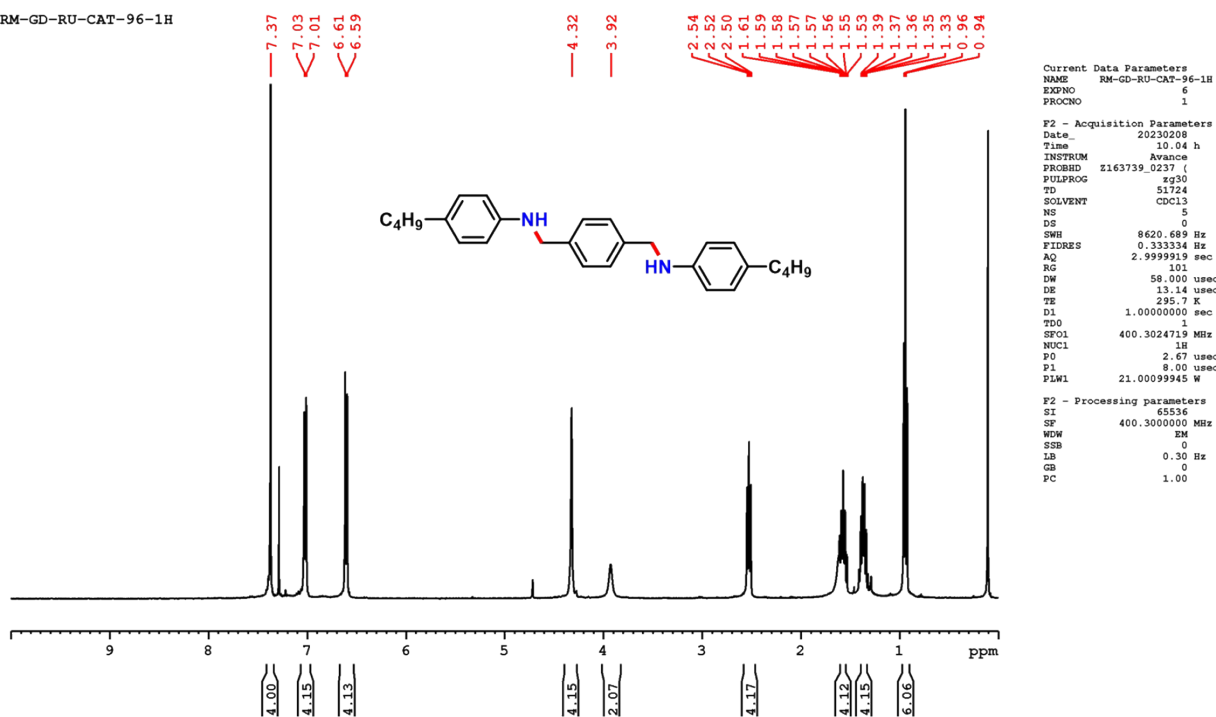

Figure S91. <sup>1</sup>H NMR spectrum of complex 3j in CDCl<sub>3</sub> (400 MHz).

RM-GD-RU-CAT-96-13C

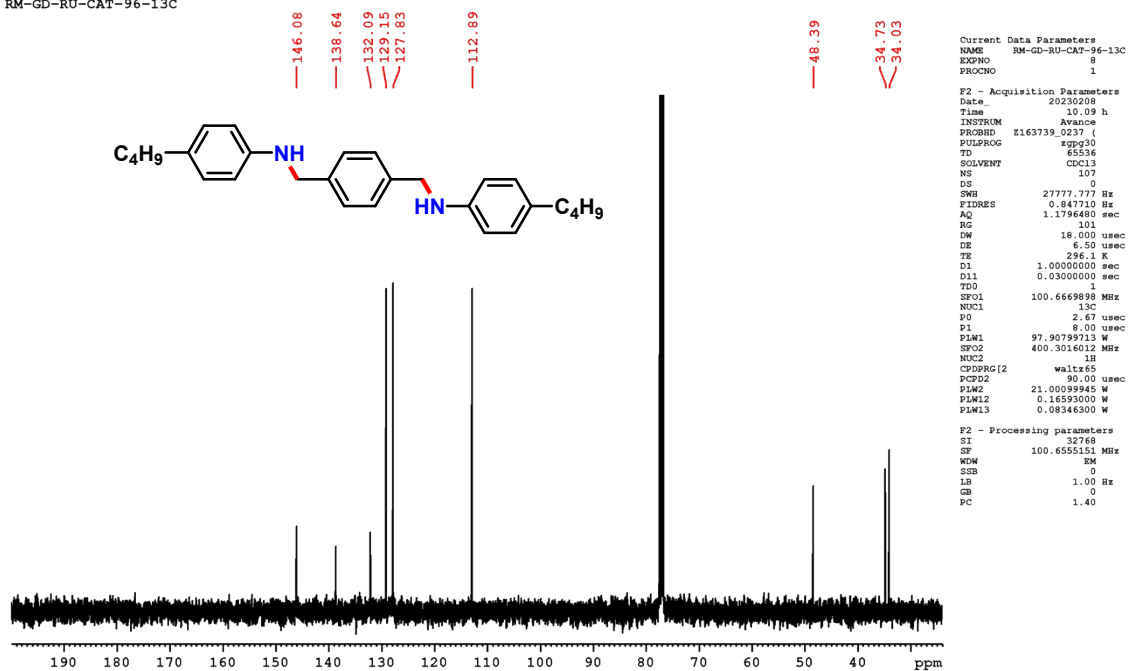

Figure S92. <sup>13</sup>C NMR spectrum of complex **3j** in CDCl<sub>3</sub> (100 MHz).

Selected GC-MS plots for reaction conducted to determine TON and TOF.

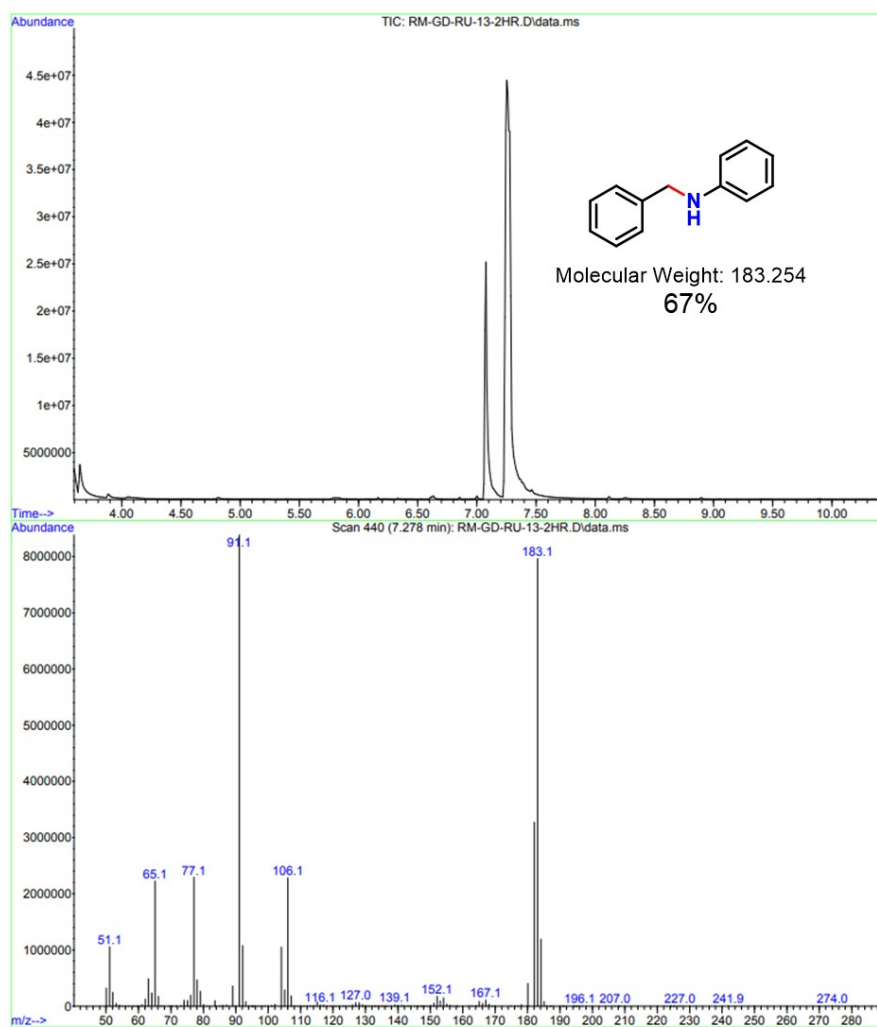

Figure S93. GC-MS plot for Table S1, entry 2.

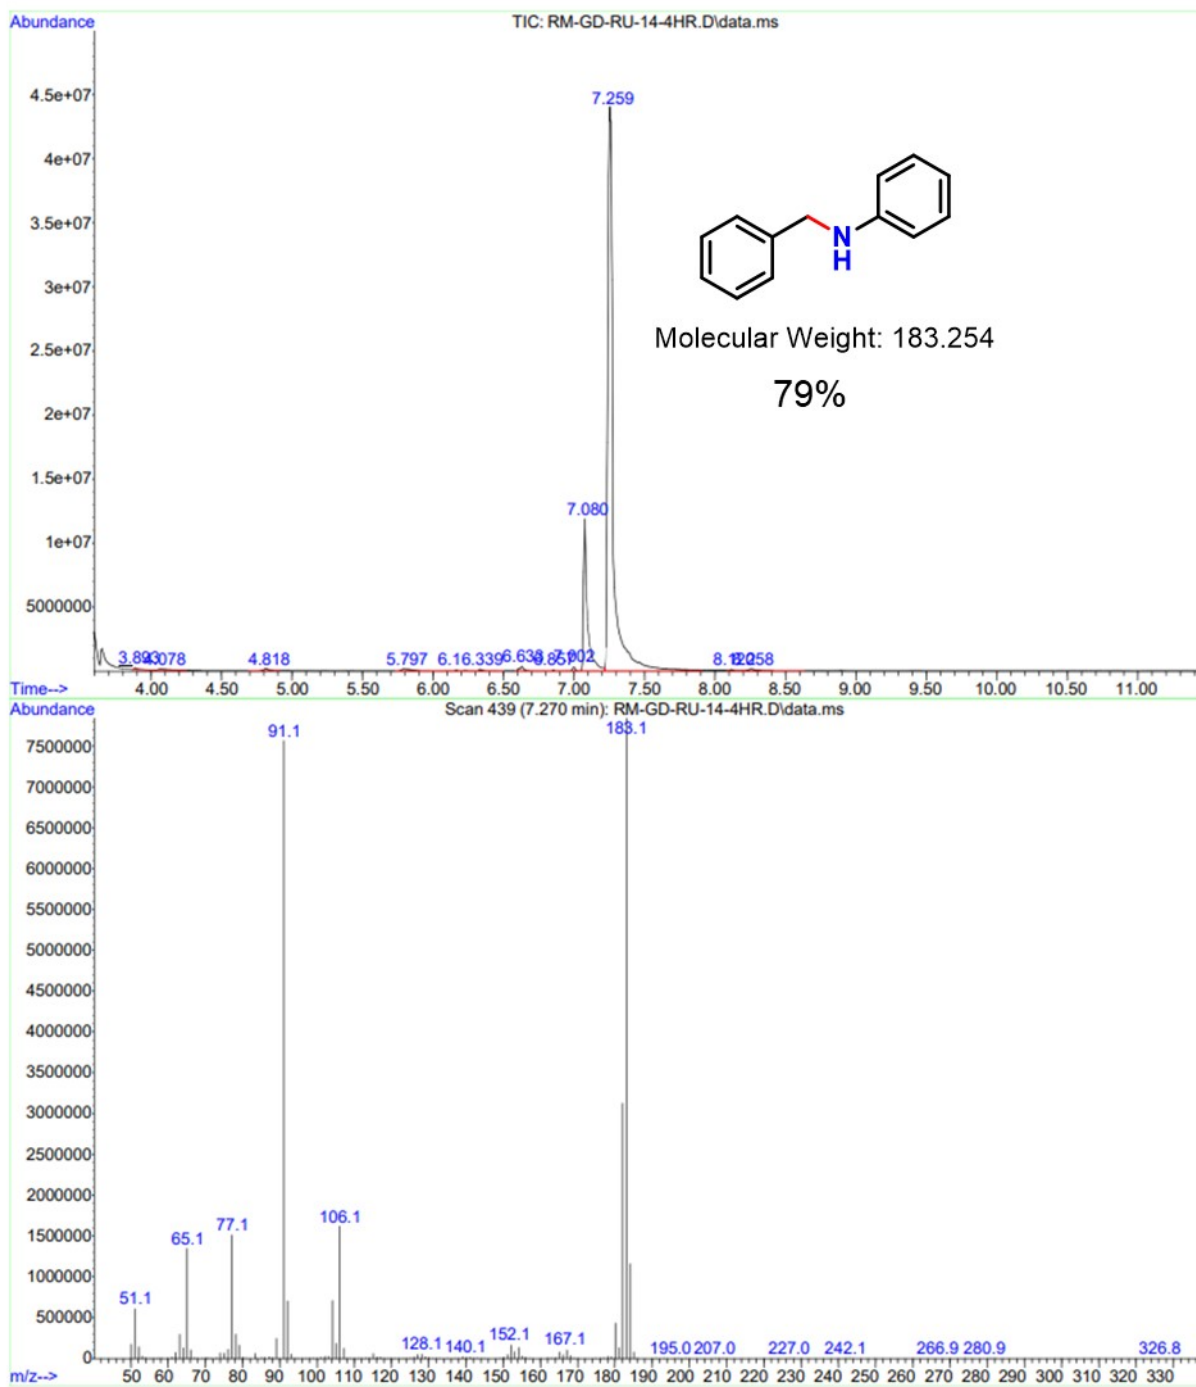

Figure S94. GC-MS plot for Table S1, entry 3.

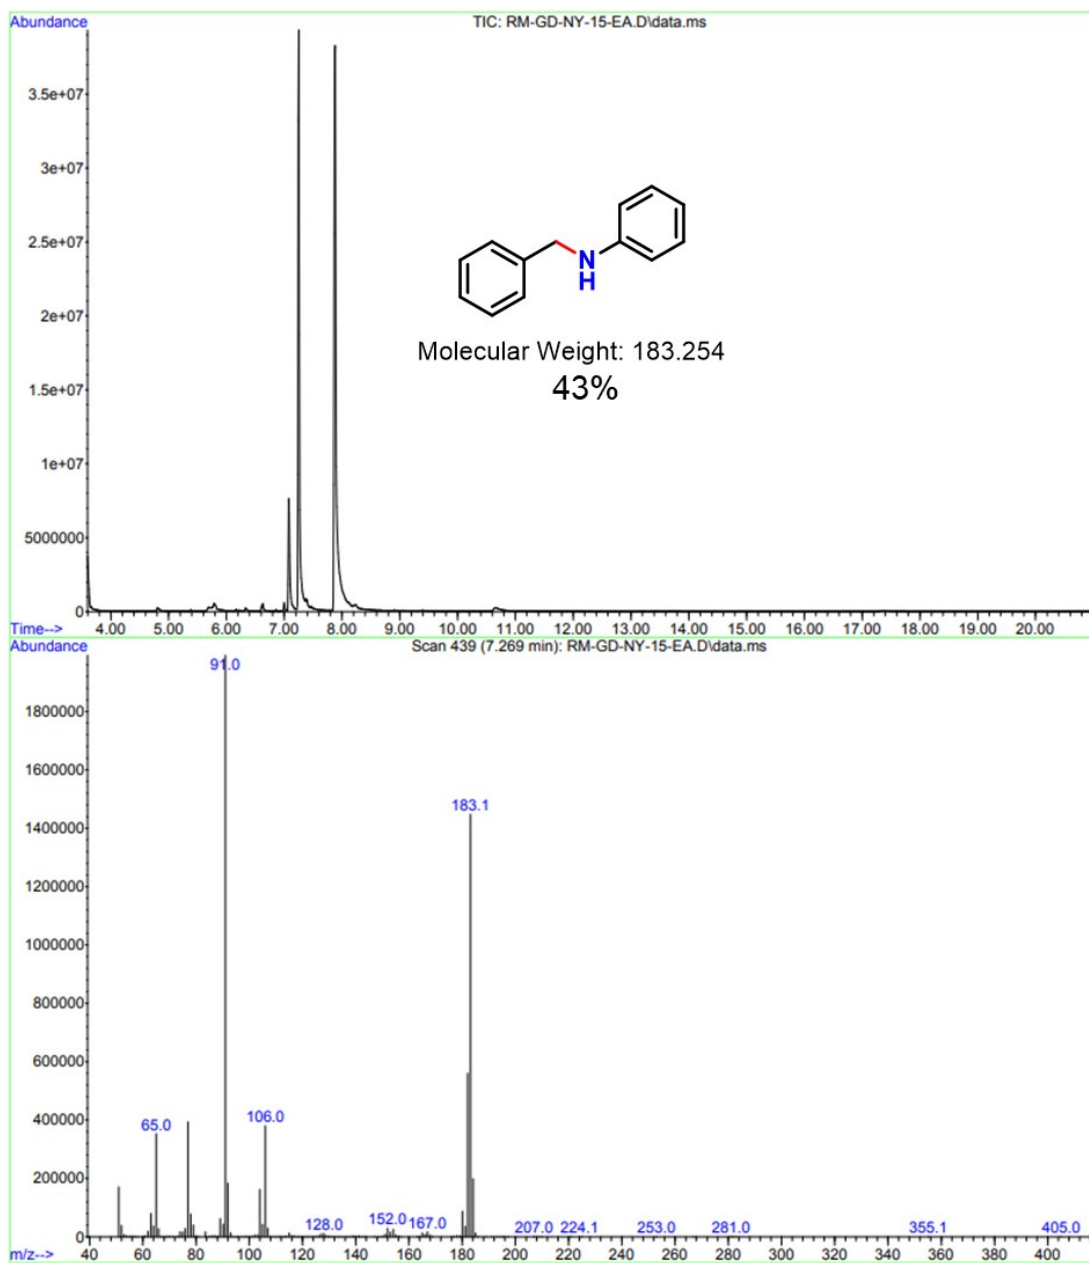

Figure S95. GC-MS plot for Table S1, entry 4.
